# Supplementary material for: NK Cell Terminal Differentiation: Correlated Stepwise Decrease of NKG2A and Acquisition of KIRs
Source: PLoS One. 2010 Aug 6;5(8):e11966. doi: 10.1371/journal.pone.0011966 (PMC2917352; doi:10.1371/journal.pone.0011966)
Supplement: Table S2 — Clusters extracted by complete hierarchical clustering and their associated ontogeny analysis using DAVID software. (0.36 MB XLS) [file pone.0011966.s003.xls]

## Sheet: Cluster1
Cluster 1
micro array SeqID	Micro array SeqName	Accesion #	DAVIDID	DAVID Gene Name	Bright #1	Bright #2	Bright #3	Bright #4	D2A+ #1	D2A+ #2	D2A+ #3	D2A+ #4	D2A- #1	D2A- #2	D2A- #3	D2A- #4
645389	AF130065	AF130065	2873416	HYPOTHETICAL PROTEIN FLB8034 PRO2158	0.196	0.557	0.993	2.014	-4.623	-5.017	-3.515	-4.622	-5.08	0.904	-2.828	-2.754
645702	MEIS3P1	NR_002211	2946591	MEIS1 HOMOLOG 3 (MOUSE) PSEUDOGENE 1	1.583	0.496	1.049	0.381	0.051	-0.165	-1.308	0.591	-5.767	-0.175	-5.43	-5.56
647554	ENST00000315313	NM_001033659	2878245	HYPOTHETICAL PROTEIN FLJ35848	1.499	1.141	0.045	1.979	-2.294	0.735	-0.306	-1.706	-1.353	-1.236	-1.487	-1.623
649044	ZNF286A	NM_020652	2867878	ZINC FINGER PROTEIN 286	0.321	0.131	-1.013	1.037	1.066	-1.17	0.045	2.213	-4.154	-5.144	-1.955	-4.518
650226	UTP11L				1.054	0.534	-0.079	2.535	-4.649	-5.086	-3.649	-4.488	-3.007	1.534	1.063	0.109
650592	GAB1	NM_207123	2865204	GRB2-ASSOCIATED BINDING PROTEIN 1	0.117	0.935	-0.02	0.861	-5.378	-1.291	-5.211	-5.04	-4.314	-5.464	-4.043	-5.148
651442	GOLIM4	NM_014498	2931593	GOLGI PHOSPHOPROTEIN 4	0.634	-0.289	-0.232	0.57	-2.876	-0.073	-5.747	-1.221	-5.609	-3.794	-5.68	-5.285
652065	PAWR	NM_002583	2858957	PRKC, APOPTOSIS, WT1, REGULATOR	0.263	0.788	0.572	1.283	-1.57	-4.964	-3.16	-4.816	-1.436	-5.025	-2.48	-2.271
652956	A_24_P942870				0.69	-0.406	-0.401	0.338	0.377	-0.597	0.104	-5.816	-6.027	-6.171	-6.073	-5.622
656063	SELL	NM_000655	3025322	SELECTIN L (LYMPHOCYTE ADHESION MOLECULE 1)	1.136	0.479	1.555	1.249	-0.844	-4.656	-0.166	-4.004	-3.179	-4.611	-3.798	-1.315
657030	THC2768929	AW998865	3024131	PHOSPHOGLYCERATE DEHYDROGENASE LIKE 1	-0.493	0.312	-0.323	-1.413	1.008	0.568	-0.151	0.52	-3.805	-5.789	-1.047	-5.097
657841	SPAG1	NM_003114	2860594	SPERM ASSOCIATED ANTIGEN 1	0.481	0.912	0.857	1.005	-4.027	0.043	-1.94	0.025	-4.612	-1.261	-4.508	-4.045
657845	SCML1	NM_006746	2872174	SEX COMB ON MIDLEG-LIKE 1 (DROSOPHILA)	1.198	0.615	0.587	0.736	-0.76	-2.327	-0.818	-0.197	-5.115	-5.692	-5.192	-5.399
658612	SMARCA5	NM_003601	2859997	SWI/SNF RELATED, MATRIX ASSOCIATED, ACTIN DEPENDENT REGULATOR OF CHROMATIN, SUBFAMILY A, MEMBER 5	1.044	-1.103	1.293	1.256	-0.095	-0.508	0.301	-0.957	-4.674	-5.797	-0.082	-5.851
659064	PGGT1B	NM_005023	2926682	PROTEIN GERANYLGERANYLTRANSFERASE TYPE I, BETA SUBUNIT	0.669	-0.307	0.097	1.272	-0.124	1.225	0.58	2.678	-2.577	-4.293	-4.448	-3.904
660803	CCDC53	NM_016053	2864562	COILED-COIL DOMAIN CONTAINING 53	-0.344	-0.077	-2.143	0.55	0.875	-0.017	0.088	-0.198	-5.95	-5.948	-1.629	-5.561
661153	C2orf77	BC065905	2868931	HYPOTHETICAL LOC129881	0.61	0.531	-0.092	1.538	-2.181	0.997	0.136	-0.59	-3.398	-5.095	-0.78	-4.938
661885	AF289600	AF289600	2872590	HYPOTHETICAL PROTEIN	1.486	1.395	0.973	1.299	-2.647	0.225	0.296	-4.648	-3.512	-3.364	-3.933	-4.525
661963	AGPAT5	NM_018361	3027919	1-ACYLGLYCEROL-3-PHOSPHATE O-ACYLTRANSFERASE 5 (LYSOPHOSPHATIDIC ACID ACYLTRANSFERASE, EPSILON)	1.845	-0.206	1.564	0.859	-2.431	0.031	0.019	-0.752	-3.361	-3.342	-3.711	-2.126
663507	AF086196	AF086196			0.971	1.539	0.683	-0.324	-5.359	-5.68	-5.763	-5.361	-5.657	-5.7	0.76	-5.294
664880	RASSF2	NM_014737	2881727	RAS ASSOCIATION (RALGDS/AF-6) DOMAIN FAMILY 2	1.251	1.116	0.6	0.199	-1.097	-0.541	-0.533	-0.892	-2.791	-1.828	-0.393	-4.396
664918	GAB1	NM_207123			0.164	1.48	0.592	0.922	-2.424	-1.343	-1.972	-2.574	-2.298	-1.597	-1.992	-1.991
665044	THC2521898	T62549			0.589	0.084	0.387	1.633	-5.19	-4.798	-5.086	-4.072	-4.72	1.453	0.015	-4.211
666767	SFRS7	NM_001031684	2873329	SPLICING FACTOR, ARGININE/SERINE-RICH 7, 35KDA	0.02	0.258	0.853	1.558	1.817	0.421	-2.005	-4.391	-4.565	-4.946	-3.096	-4.354
672662	TTC7A	NM_020458	2860583	TETRATRICOPEPTIDE REPEAT DOMAIN 7A	0.695	-0.051	0.878	2.224	-0.221	0.501	-1.252	0.724	-6.112	-0.472	-3.082	-5.394
674276	HOXA9	NM_152739	2860077	HOMEOBOX A9	1.134	1.218	0.048	0.338	-4.84	-4.086	-3.279	-4.194	-5.392	-2.609	-4.772	-2.374
677085	CD2AP	NM_012120	3027392	CD2-ASSOCIATED PROTEIN	1.691	0.601	-1.783	-0.007	-0.147	-1.262	0.127	0.423	-5.495	-0.655	-5.256	-4.683
679515	HVCN1	NM_032369	2862618	HYPOTHETICAL PROTEIN MGC15619	0.68	0.659	0.318	0.521	-1.554	-0.461	-2.286	-2.493	-1.589	-2.663	-2.223	-2.154
680569	FKBP5	NM_004117	2870795	FK506 BINDING PROTEIN 5	0.96	-0.169	1.368	-0.136	-4.441	-5.136	0.587	-4.642	-2.99	-5.194	-4.232	-4.776
680889	TTC8	NM_144596	2869926	TETRATRICOPEPTIDE REPEAT DOMAIN 8	2.518	2.005	0.899	-2.351	0.603	-0.061	0.326	-0.655	-1.618	-4.528	-2.746	-4.132
NO ONTOGENY ASSOCIATED FOR CLUSTER 1
Cluster 2
micro array SeqID	Micro array SeqName	Accesion #	DAVIDID	DAVID Gene Name	Bright #1	Bright #2	Bright #3	Bright #4	D2A+ #1	D2A+ #2	D2A+ #3	D2A+ #4	D2A- #1	D2A- #2	D2A- #3	D2A- #4
641041	THC2407032				0.903	1.296	0.548	0.636	-0.396	0.304	0.26	-0.795	-1.129	-0.358	-0.175	-1.5
641336	MBNL1	NM_021038	3028607	MUSCLEBLIND-LIKE (DROSOPHILA)	0.23	0.521	0.226	0.322	-0.23	-0.229	-0.357	-0.168	-0.089	0.143	-0.156	-0.518
641373	AA765447	AA765447	3023704	CALCIUM BINDING PROTEIN P22	0.911	1.207	0.894	1.178	-0.167	0.576	0.799	-0.608	-1.129	-0.328	-0.449	-0.392
641427	THC2504848	XM_932610	3025916	HYPOTHETICAL PROTEIN LOC339047	0.339	0.184	0.204	0.215	-0.012	0.006	-0.128	-0.136	-0.24	-0.081	-0.036	-0.411
641643	GATA3	NM_001002295	2863933	GATA BINDING PROTEIN 3	0.656	0.747	0.547	0.768	-0.095	0.143	-0.862	0.155	-0.07	-0.612	-0.849	-0.646
641692	CD521938				0.56	1.014	0.969	1.137	0.043	-1.019	0.098	-1.059	-1.078	-0.991	-0.808	-0.499
641780	YWHAG	NM_012479	2872150	TYROSINE 3-MONOOXYGENASE/TRYPTOPHAN 5-MONOOXYGENASE ACTIVATION PROTEIN, GAMMA POLYPEPTIDE	0.45	0.499	0.883	1.823	-0.58	-0.904	0.109	-1.314	-0.911	-0.614	-0.886	0.219
641782	WHDC1	AK126887	3030018	WAS PROTEIN HOMOLOGY REGION 2 DOMAIN CONTAINING 1	0.61	0.541	0.366	0.049	-0.729	-0.274	-0.074	-0.435	-0.049	-0.37	-0.155	-0.062
642435	PEX16	NM_004813	2873010	PEROXISOMAL BIOGENESIS FACTOR 16	0.015	0.439	0.897	0.216	0.341	-0.184	0.38	-0.625	-1.424	-0.728	-0.657	-1.522
642538	COTL1	NM_021149	2865195	COACTOSIN-LIKE 1 (DICTYOSTELIUM)	1.055	1.187	0.283	0.844	-0.193	-1.338	-1.99	-0.72	-1.32	-0.143	-1.545	-0.739
642607	AVPR2	NM_000054	2860072	ARGININE VASOPRESSIN RECEPTOR 2 (NEPHROGENIC DIABETES INSIPIDUS)	0.692	0.694	1.073	0.493	-0.156	0.089	-0.717	-0.248	-0.234	-0.766	-0.219	-0.043
642755	FXYD5	NM_144779	2877030	FXYD DOMAIN CONTAINING ION TRANSPORT REGULATOR 5	0.84	-0.133	0.489	0.23	-0.239	-0.727	-0.339	-0.399	-0.479	-0.521	-0.415	-0.223
642853	MAP3K8	NM_005204	2860888	MITOGEN-ACTIVATED PROTEIN KINASE KINASE KINASE 8	1.262	0.937	0.122	1.413	-0.39	-0.353	0.341	0.663	-2.094	-0.664	-1.284	-0.307
643119	SOX4	NM_003107	3024488	SRY (SEX DETERMINING REGION Y)-BOX 4	0.777	0.82	0.502	1.935	-1.148	-0.079	-1.471	-0.402	-0.113	-1.468	-0.525	-1.453
643184	TMEM123	NM_052932	2868231	TRANSMEMBRANE PROTEIN 123	0.74	0.639	0.43	0.743	0.187	-0.208	-0.112	0.583	-0.32	-1.194	-0.853	-2.387
643324	ARTN	NM_057091	2860088	ARTEMIN	0.286	0.703	0.1	0.336	-0.108	-0.159	-0.184	-0.253	-0.276	0.11	-0.154	-0.318
643468	Z25424	Z25424	2870091	PROTEIN-SERINE/THREONINE KINASE	0.846	0.247	0.697	1.055	-0.182	-0.927	-0.539	0.14	-1.037	-1.051	-1.262	-1.074
643641	DHRS1	NM_138452	3023893	DEHYDROGENASE/REDUCTASE (SDR FAMILY) MEMBER 1	1.359	0.924	1.177	0.639	0.399	0.346	-0.469	-0.88	-0.034	-0.123	-0.712	-0.461
643648	DUSP2	NM_004418	3028348	DUAL SPECIFICITY PHOSPHATASE 2	0.514	0.359	0.694	1.172	-0.462	-0.692	-0.207	0.834	-1.101	-0.579	-1.378	-0.304
643673	SPTLC2	NM_004863	3025318	SERINE PALMITOYLTRANSFERASE, LONG CHAIN BASE SUBUNIT 2	0.526	0.342	0.495	0.501	-0.683	-0.008	0.053	-0.468	-0.84	-1.148	-0.432	-1.808
643852	THC2587036	BF689038	2875314	ACTIVATING TRANSCRIPTION FACTOR 4 (TAX-RESPONSIVE ENHANCER ELEMENT B67)	0.565	0.47	0.273	0.533	-0.274	-0.314	-0.164	-0.696	-0.447	-0.581	-0.099	-1.35
643955	FLNB	AK022486	2870489	FILAMIN B, BETA (ACTIN BINDING PROTEIN 278)	1.104	1.498	0.626	1.693	-0.88	-0.042	-1.19	-1.092	-0.543	-1.475	-1.045	-0.757
643975	C1orf84	NM_182518	2871333	CHROMOSOME 1 OPEN READING FRAME 84	-0.192	0.412	0.452	0.16	-0.012	-0.161	0.003	-0.249	-0.443	-0.276	-0.733	-0.382
644140	PML	NM_002675	2874717	PROMYELOCYTIC LEUKEMIA	0.115	0.192	0.167	0.026	-0.057	0.018	0.011	0.094	-0.141	-0.039	-0.166	-0.231
644156	OBFC2B	NM_024068	2858440	OLIGONUCLEOTIDE/OLIGOSACCHARIDE-BINDING FOLD CONTAINING 2B	1.483	0.562	0.304	0.685	-0.631	-0.077	-0.662	-2.52	-2.047	-0.574	-1.257	-1.515
644180	OCM2	NM_006188	2874157	ONCOMODULIN	0.753	0.467	0.795	0.558	-0.42	-0.773	-0.377	-0.811	-0.36	-0.503	-1.544	-0.734
644234	MFGE8	NM_005928	3028443	MILK FAT GLOBULE-EGF FACTOR 8 PROTEIN	1.283	0.627	0.522	1.304	-0.85	-1.449	-0.859	-0.761	-1.227	-0.557	0.397	-0.803
644417	NOTCH2NL	NM_203458	2865104	NOTCH HOMOLOG 2 (DROSOPHILA) N-TERMINAL LIKE	0.599	0.675	0.24	1.092	-0.772	-0.498	0.033	0.095	-1.388	-0.091	-0.909	-1.789
644445	TP53INP1	NM_033285	2871029	TUMOR PROTEIN P53 INDUCIBLE NUCLEAR PROTEIN 1	1.162	0.958	0.918	0.326	-0.81	-0.582	-1.419	-1.486	-1.371	-0.645	-0.12	-0.432
644460	AGAP3	NM_031946	2861033	CENTAURIN, GAMMA 3	0.728	-0.14	0.773	1.045	-0.463	-1.115	-0.044	-1.093	-0.759	-0.523	-0.887	-0.725
644722	ZFYVE26	NM_015346	2872949	ZINC FINGER, FYVE DOMAIN CONTAINING 26	0.59	0.821	-0.356	0.125	0.447	1.831	0.155	1.342	-3.443	-1.8	-0.014	-1.76
645033	A_24_P255763				0.247	0.232	0.345	0.411	-0.14	-0.335	0.044	-0.276	-0.052	-0.495	-0.143	-0.398
645155	ENST00000242475				0.684	0.553	1.144	0.759	-1.024	-1.236	-0.226	-0.73	-2.525	-0.416	-0.933	-3.027
645202	ANKRD13D	NM_207354	3028487	ANKYRIN REPEAT DOMAIN 13 FAMILY, MEMBER D	0.425	0.24	-0.123	0.051	-0.294	-0.032	-0.341	-0.084	-0.452	-0.546	-0.692	-0.446
645227	UBN2	AK098644	3026634	HYPOTHETICAL PROTEIN FLJ25778	-0.528	1.148	0.689	0.117	-1.282	0.677	0.492	2.406	-2.293	-3.042	-2.264	-2.258
645233	COTL1	L08436	2865195	COACTOSIN-LIKE 1 (DICTYOSTELIUM)	1.313	1.318	0.644	1.056	-0.999	-0.298	-1.497	0.276	-1.227	-1.386	-1.283	-0.801
645521	OR10R2	NM_001004472	2859389	OLFACTORY RECEPTOR, FAMILY 10, SUBFAMILY R, MEMBER 2	0.258	0.598	0.539	0.723	-0.367	-0.395	-0.2	-0.684	-0.913	-0.841	-0.588	-1.07
645811	CBWD5	NM_172003	2862486	HYPOTHETICAL PROTEIN FROM CLONE 1659351	0.389	0.069	0.272	0.527	-0.638	-0.198	-0.209	-0.648	-3.515	-1.32	-1.262	-1.251
645864	RPS3	NM_001005	2878381	RIBOSOMAL PROTEIN S3	0.156	0.271	0.292	0.354	-0.136	-0.502	-0.015	-0.312	-0.279	-0.181	-0.443	0.015
645896	X62691	X62691	3027583	RIBOSOMAL PROTEIN S15A	0.103	0.144	0.075	-0.052	NaN	-0.072	-0.235	-0.098	-0.247	-0.353	-0.167	-0.127
646004	A_24_P144275				0.346	-0.061	-0.134	0.548	-0.283	-0.303	0.064	0.133	-0.508	-0.373	-0.65	-0.97
646141	COTL1	NM_021149			1.248	1.3	0.617	1.021	-1.21	-0.331	-1.878	0.252	-1.239	-2.275	-1.456	-1.092
646570	ESD	NM_001984	3029472	ESTERASE D/FORMYLGLUTATHIONE HYDROLASE	-0.051	0.892	0.509	1.048	0.355	0.318	-0.968	-0.234	-2.73	-0.37	-3.192	-2.887
646776	A_24_P264143				0.117	0.536	0.297	0.406	-0.489	-0.227	-0.483	-0.044	-0.241	-0.185	0.025	-0.256
646786	BC002534	BC002534	2875509	ZINC FINGER PROTEIN 568	1.227	1.208	1.389	1.532	0.12	-1.04	-0.401	-0.262	-0.181	-0.882	-0.297	0.151
646906	CR597822	CR597822			1.871	1.248	1.577	0.733	-0.267	0.025	0.381	-1.362	0.478	-1.106	-0.298	-1.177
647066	IRAK3	NM_007199	2869292	INTERLEUKIN-1 RECEPTOR-ASSOCIATED KINASE 3	1.517	0.276	0.825	0.526	-0.868	-0.428	-0.339	-0.9	-1.217	-1.482	-1.941	-1.176
647109	NMD3	NM_015938	2860668	NMD3 HOMOLOG (S. CEREVISIAE)	1.482	0.792	0.056	1.128	0.574	-0.084	1.255	-1.381	-1.51	-1.897	-0.918	-1.262
647263	PHF20	NM_016436	2867885	PHD FINGER PROTEIN 20	0.737	0.549	-0.158	0.414	-0.513	0.133	-0.111	-0.209	-1.118	-0.627	-0.4	-0.653
647350	RPL7A	NM_000972	2867551	RIBOSOMAL PROTEIN L7A	0.355	0.173	0.105	0.113	-0.243	-0.084	-0.274	0.022	-0.243	-0.286	-0.009	-0.387
647627	GBL	NM_022372	3025477	G PROTEIN BETA SUBUNIT-LIKE	0.447	0.428	0.511	0.367	-0.676	-0.07	-0.395	-0.288	-0.025	-0.541	-0.467	-0.373
647729	CRYZL1	NM_145858	3026815	CRYSTALLIN, ZETA (QUINONE REDUCTASE)-LIKE 1	1.834	0.708	2.547	0.388	0.077	0.529	-0.23	0.141	-0.661	-0.527	-1.404	-0.674
648297	GPNMB	NM_001005340	2864954	GLYCOPROTEIN (TRANSMEMBRANE) NMB	0.519	0.613	0.568	0.789	0.016	-0.47	-0.293	0.248	-1.028	-0.905	-1.029	-0.768
648339	SLC12A7	NM_006598	2866306	SOLUTE CARRIER FAMILY 12 (POTASSIUM/CHLORIDE TRANSPORTERS), MEMBER 7	0.25	0.191	0.564	0.196	-0.105	0.113	-0.306	-0.473	-0.771	-0.532	-0.271	-0.364
648744	DUSP4	NM_001394	2874504	DUAL SPECIFICITY PHOSPHATASE 4	0.582	0.593	0.842	1.269	-0.471	-0.694	-0.968	-0.413	-1.3	-1.333	-1.07	-0.818
648934	AHNAK	NM_001620	2865234	AHNAK NUCLEOPROTEIN (DESMOYOKIN)	0.349	0.653	0.982	0.922	-0.941	-0.626	-0.527	-0.294	-0.696	-1.41	-0.474	-1.771
649008	AK000832	AK000832	2877573	HYPOTHETICAL PROTEIN FLJ20825	0.095	1.09	1.293	2.347	-0.624	-1.102	-0.823	-1.633	-1.149	-0.756	-0.812	-0.574
649118	ENST00000339991				0.435	-0.044	0.03	0.443	-0.336	-0.226	0.11	-0.05	-0.45	-0.272	-0.62	-0.799
649267	DYRK1A	NM_130436	2875344	DUAL-SPECIFICITY TYROSINE-(Y)-PHOSPHORYLATION REGULATED KINASE 1A	0.493	-0.026	0.629	0.247	0.2	0.153	0.096	0.187	-0.666	0.091	-1.38	-0.902
649420	ABHD2	NM_007011	2876898	ABHYDROLASE DOMAIN CONTAINING 2	0.717	0.337	0.382	1.331	-0.61	-0.322	-0.223	0.562	-0.895	-0.328	-0.788	-1.808
649575	BG190831	BG190831			0.146	0.603	0.251	1.186	0.135	-0.211	-0.414	-0.115	-0.421	-0.78	-0.446	-1.584
649648	NARF	NM_012336	3025865	NUCLEAR PRELAMIN A RECOGNITION FACTOR	0.561	0.108	0.404	0.698	-0.758	0.023	-0.347	0.133	-0.909	-0.492	-0.987	-1.21
649915	AL698801				0.591	0.143	0.055	-1.142	0.27	1.345	0.628	-0.417	-2.228	-3.314	-0.66	-2.807
650270	LOC100128252	BC008651	2943935	HYPOTHETICAL PROTEIN MGC9913	1.702	0.871	1.541	1.695	-1.578	-0.976	-0.9	-0.142	0.807	-0.543	-1.615	-0.01
650455	GMPPA	NM_013335	2874554	GDP-MANNOSE PYROPHOSPHORYLASE A	-0.015	0.21	0.612	0.916	-0.095	-0.956	-0.065	0.272	-1.777	-1.552	-0.199	-1.29
650533	TAPBP	NM_003190	3027776	TAP BINDING PROTEIN (TAPASIN)	0.422	0.171	0.362	0.397	-0.446	0.056	0.01	-0.049	-0.495	-0.556	-0.124	-0.106
650662	WDR70	NM_018034	2876981	WD REPEAT DOMAIN 70	0.743	0.679	1.596	0.671	-0.603	-0.812	0.058	-0.015	-0.773	-1.008	-0.599	-0.636
650664	BC007809	BC007809			0.625	0.347	0.456	0.455	-0.249	-0.593	-0.223	-0.066	-0.684	-0.363	-0.721	-0.457
650947	XCL2	NM_003175	3029637	CHEMOKINE (C MOTIF) LIGAND 2	0.729	0.866	0.594	0.255	-0.339	-0.429	-0.426	-0.126	-1.269	-0.55	-1.486	-0.708
650989	A_24_P625683				0.351	0.838	0.077	0.356	-0.29	-0.079	-0.453	-0.029	-0.422	0.022	-1.015	-0.727
651108	LMBRD2	NM_001007527	2870334	LMBR1 DOMAIN CONTAINING 2	1.881	1.863	1.661	0.686	0.608	-0.67	1.193	0.188	-0.991	-0.279	-1.503	-1.694
651318	IGFBP4	NM_001552	2860207	INSULIN-LIKE GROWTH FACTOR BINDING PROTEIN 4	1.176	1.141	0.827	0.882	-0.817	-1.176	-1.335	0.569	-1.24	-1.29	-0.914	-0.633
651417	ENST00000272885				0.144	0.118	-0.031	0.152	-0.144	-0.318	-0.153	0.057	-0.261	-0.236	-0.391	-0.098
651990	GCDH	NM_013976	2858414	GLUTARYL-COENZYME A DEHYDROGENASE	0.868	1.34	0.71	0.973	0.087	0.729	-1.135	0.153	-0.712	-0.745	-0.726	-0.237
651994	A_32_P102627				1.43	0.495	0.523	0.174	-0.967	-0.466	-1.3	-0.096	-0.863	-1.183	-0.843	-2.248
652156	TPT1	NM_003295	2860544	TUMOR PROTEIN, TRANSLATIONALLY-CONTROLLED 1	0.196	0.174	0.195	0.077	-0.137	-0.265	-0.244	-0.089	-0.374	-0.032	-0.165	-0.379
652629	NAGK	NM_017567	3026600	N-ACETYLGLUCOSAMINE KINASE	0.061	1.447	0.57	1.04	-0.954	-0.334	-0.764	-0.272	0.058	-0.023	0.427	-0.711
652737	CD83	NM_004233	2869848	CD83 ANTIGEN (ACTIVATED B LYMPHOCYTES, IMMUNOGLOBULIN SUPERFAMILY)	0.971	0.638	0.314	0.674	-0.017	-1.312	-0.09	-0.398	-1.231	-0.554	-0.083	-1.142
652794	NARG1L	NM_024561	2864949	NMDA RECEPTOR REGULATED 1-LIKE	0.767	0.411	1.14	0.695	0.037	-0.468	-0.19	-0.433	-0.311	-0.936	-0.007	-0.791
653010	C20orf11	NM_017896	2894189	CHROMOSOME 20 OPEN READING FRAME 11	1.531	1.53	1.029	0.502	-0.649	-0.577	-0.288	-0.417	1.105	-0.43	-0.164	-0.422
653258	SPAST	NM_014946	2870909	SPASTIN	0.357	1.146	0.887	0.429	-0.022	0.613	1.753	1.403	-2.392	-0.69	-2.422	-4.477
653288	PCDH21	NM_033100	2875455	PROTOCADHERIN 21	1.238	0.854	0.564	1.579	-0.752	-1.133	-1.205	0.181	-0.423	-1.224	-1.08	-0.698
653349	CHKA	NM_001277	2864825	CHOLINE KINASE ALPHA	1.561	1.107	0.809	0.866	-1.361	-0.697	0.196	-0.438	0.257	-1.176	-0.835	-2.132
653540	A_24_P918561				-0.048	0.483	-0.317	1.142	-1.457	-0.768	-1.46	0.244	-1.822	-2.118	-1.693	-2.877
653674	HIST1H3E	NM_003532	2865679	HISTONE 1, H3A	0.193	0.223	0.289	0.249	0.397	0.092	0.182	-0.323	-0.342	-0.134	-0.4	-0.472
653689	MKNK2	NM_199054	2873178	MAP KINASE INTERACTING SERINE/THREONINE KINASE 2	0.575	0.981	0.655	1.041	-0.963	0.186	0.13	-0.631	-2.152	-1.09	-1.292	-0.293
653808	HDAC10	NM_032019	2872213	HISTONE DEACETYLASE 10	0.588	0.552	0.449	0.052	-0.376	-0.301	-0.427	-0.431	0.146	-0.663	-0.491	-0.549
653926	ATF4	NM_001675	2875314	ACTIVATING TRANSCRIPTION FACTOR 4 (TAX-RESPONSIVE ENHANCER ELEMENT B67)	0.357	0.145	0.282	0.562	0.208	-0.334	-0.381	0.191	-0.597	-0.658	-0.495	-0.485
654399	TNFRSF11A	NM_003839	2868212	TUMOR NECROSIS FACTOR RECEPTOR SUPERFAMILY, MEMBER 11A, NFKB ACTIVATOR	1.141	0.299	1.354	0.919	-0.733	0.065	-1.466	-0.223	-0.951	-2.603	-0.153	-1.483
654425	SNHG8	BM926530			0.83	1.738	-1.883	0.496	0.216	-0.951	0.799	1.147	-2.812	-2.27	-2.415	-2.736
654591	FLNB	NM_001457	2870489	FILAMIN B, BETA (ACTIN BINDING PROTEIN 278)	1.059	1.187	0.046	0.748	-0.897	-0.085	-1.525	-0.84	-1.696	-0.58	-1.052	-0.184
654595	LOC642006				0.612	0.323	0.486	0.393	0.743	0.048	0.368	-0.579	-0.628	-1.18	-0.176	-1.504
655047	NR1I3	NM_005122	2865125	NUCLEAR RECEPTOR SUBFAMILY 1, GROUP I, MEMBER 3	0.835	0.995	-0.199	0.887	0.203	0.365	0.196	0.302	-0.766	-1.017	-0.171	-0.851
655061	THC2598362	XM_934182	2978128	HYPOTHETICAL PROTEIN LOC647022	0.327	0.393	0.034	0.469	-0.334	0.142	-0.067	-0.377	-0.476	-0.111	-0.994	-0.408
655602	HELLS	NM_018063	3028837	HELICASE, LYMPHOID-SPECIFIC	1.122	0.667	0.958	0.97	0.598	-0.404	-0.782	-1.066	-1.329	-1.392	-1.132	-1.314
656039	BQ354462	BQ354462			0.99	1.892	0.77	1.062	-0.689	-1.364	-0.942	-0.497	-0.905	-1.192	-1.094	-0.591
656269	CYTSB	NM_001033553	2859083	SPECTRIN DOMAIN WITH COILED-COILS 1	0.726	1.683	1.11	2.075	0.115	-0.117	-1.358	-1.066	-2.405	-1.788	-1.944	-1.087
656395	AK097051	AK097051	3024210	CDNA FLJ39732 FIS, CLONE SMINT2015810	0.751	0.46	1.165	0.85	-0.432	-0.396	-0.334	0.165	0.175	-0.659	-0.258	-0.284
656843	MKNK2	NM_017572	2873178	MAP KINASE INTERACTING SERINE/THREONINE KINASE 2	0.764	0.903	0.681	0.771	-0.685	-0.691	-0.891	0.299	-1.723	-1.24	-0.965	-0.34
656941	A_24_P93397				0.162	0.079	0.122	0.214	-0.387	-0.157	0.034	-0.12	-0.154	-0.035	-0.17	-0.219
656958	KDSR	NM_002035	2863272	FOLLICULAR LYMPHOMA VARIANT TRANSLOCATION 1	0.652	1.459	0.746	2.281	-0.336	-0.324	-0.897	-0.723	-0.672	0.494	-0.319	-0.857
657289	WDR40A	NM_015397	3016349	WD REPEAT DOMAIN 40A	0.702	0.525	0.304	1.062	-0.395	-0.968	-0.547	-0.031	-0.763	-0.226	-0.772	-0.187
657634	CSNK1D	AB209463	2864056	CASEIN KINASE 1, DELTA	0.218	0.148	0.191	0.898	0.058	-0.051	-0.332	0.674	-1.2	-1.138	-1.169	-0.986
657856	AB073896	AL832747	2867093	GUANINE NUCLEOTIDE BINDING PROTEIN (G PROTEIN), Q POLYPEPTIDE	1.907	0.866	-0.065	0.792	-1.791	-0.678	-0.773	-0.91	-0.624	-0.12	-0.601	-0.519
658045	AA576497	AA576497	2860200	ACTIVATING TRANSCRIPTION FACTOR 6	0.546	1.329	0.578	0.259	0.234	1.017	0.449	1.786	-2.066	-0.67	-2.503	-2.402
658076	HLA-DPA1	NM_033554	3025978	MAJOR HISTOCOMPATIBILITY COMPLEX, CLASS II, DP ALPHA 1	0.897	1.05	0.734	1.503	-0.674	-1.161	-0.797	-0.333	-1.018	-0.605	0.763	0.272
658173	A_32_P113404				0.12	0.407	0.47	0.69	0.362	0.674	0.635	0.588	-0.618	-0.326	-2.993	-1.202
658347	SFRS17A	BC028151	3025069	DNA SEGMENT ON CHROMOSOME X AND Y (UNIQUE) 155 EXPRESSED SEQUENCE, ISOFORM 1	0.442	0.842	1.221	1.404	0.031	-0.218	-0.609	0.176	-0.703	-1.16	-1.058	-0.604
658540	A_32_P36225				0.577	0.462	0.642	0.105	-0.647	-0.215	0.508	-0.355	-0.825	-1.164	-0.868	-0.187
658632	RAB43	NM_198490	2870828	RAB43, MEMBER RAS ONCOGENE FAMILY	0.543	0.856	0.942	0.736	-0.084	-0.309	-0.003	-0.774	-0.882	0.363	-0.765	-1.055
659364	RPS15A	NM_001019	3027583	RIBOSOMAL PROTEIN S15A	0.185	0.121	0.05	0.001	-0.203	-0.186	-0.106	-0.14	-0.213	0.046	-0.19	-0.207
659937	CLSTN3	NM_014718	2877838	CALSYNTENIN 3	1.329	0.726	0.882	0.169	-0.03	-0.165	0.666	0.493	-1.044	-0.823	-0.756	-0.511
660383	GZMK	NM_002104	2868861	GRANZYME K (GRANZYME 3; TRYPTASE II)	1.111	0.101	0.822	1.048	-0.911	-0.791	-0.877	-0.837	-1.059	-0.002	-1.138	-0.632
660589	DCP1A	AK025344	2876205	DCP1 DECAPPING ENZYME HOMOLOG A (S. CEREVISIAE)	0.211	0.487	0.341	1.158	-0.405	-0.409	-0.33	-1.974	-1.023	-0.527	-0.685	-1.13
660728	PUM2	NM_015317	2874805	PUMILIO HOMOLOG 2 (DROSOPHILA)	0.12	0.443	-0.021	0.595	-0.028	-0.071	0.141	-0.018	-0.325	-0.79	-0.863	-0.779
660759	ENTPD6	NM_001247	2878294	ECTONUCLEOSIDE TRIPHOSPHATE DIPHOSPHOHYDROLASE 6 (PUTATIVE FUNCTION)	0.67	0.565	1.146	0.678	-0.454	-0.307	-0.456	-0.809	0.114	-0.729	-0.36	-0.584
660942	GNL1	AK095071	3021374	HYPOTHETICAL PROTEIN LOC285831	-0.575	-0.249	1.025	0.349	0.183	-0.116	1.089	0.74	-2.204	-3.736	-0.1	-3.107
661083	FHOD1	NM_013241	2865749	FORMIN HOMOLOGY 2 DOMAIN CONTAINING 1	1.096	-0.114	0.298	0.555	0.119	-0.338	0.617	-0.204	-1.234	-0.639	-1.212	-0.733
661200	XCL1	NM_002995	2863067	CHEMOKINE (C MOTIF) LIGAND 1	1.018	1.049	0.679	0.633	-0.226	-0.843	-0.228	-0.601	-0.713	-1.721	-1.15	-0.152
662229	BC024649	BC024649			0.153	0.248	0.262	0.054	-0.103	-0.024	-0.146	-0.259	-0.246	-0.14	-0.132	-0.137
662290	THC2537829				1.299	0.638	0.137	0.418	-0.254	-1.01	0.409	0.314	-1.794	-0.681	-1.694	-0.84
662492	BG950086	BG950086	2873533	DUAL SPECIFICITY PHOSPHATASE 1	0.771	0.379	0.439	1.39	0.32	-0.598	-0.823	-0.124	-0.357	-0.592	-1.027	-0.091
662507	THC2407002				1.115	0.886	1.051	0.694	0.21	-1.193	-1.003	-0.131	-0.602	-0.728	-0.867	-0.824
662826	TCF7	NM_003202	2872735	TRANSCRIPTION FACTOR 7 (T-CELL SPECIFIC, HMG-BOX)	0.57	0.741	0.602	0.859	-0.101	-0.149	-0.417	-0.553	-1.353	-0.239	-0.776	-0.086
663224	KIT	NM_000222	2860015	V-KIT HARDY-ZUCKERMAN 4 FELINE SARCOMA VIRAL ONCOGENE HOMOLOG	2.416	0.329	1.048	1.447	-0.387	-1.504	-0.6	-0.974	-0.445	-1.459	-0.679	-0.339
663386	COTL1	NM_021149			1.24	1.47	0.904	0.853	-0.841	-0.349	-1.293	0.139	-0.85	-1.485	-0.909	-0.807
663541	RBMS3	NM_014483	2859366	RNA BINDING MOTIF, SINGLE STRANDED INTERACTING PROTEIN	0.615	0.354	0.739	0.979	-0.381	0.013	0.535	-0.289	-1.628	-1.102	0.022	-1.281
663593	EEF2K	NM_013302	2878572	EUKARYOTIC ELONGATION FACTOR-2 KINASE	1.282	1.223	1.699	1.274	-0.789	-1.114	-1.043	-0.161	-1.052	0.977	-1.201	-2.445
663869	TNFAIP3	NM_006290	2862702	TUMOR NECROSIS FACTOR, ALPHA-INDUCED PROTEIN 3	0.979	0.413	0.566	0.696	0.149	-0.625	-0.341	0.093	-1.009	-0.804	-0.398	0.113
663937	THC2553216				0.005	0.066	0.106	0.347	-0.28	-0.062	-0.322	-0.241	-0.094	-0.356	-0.424	-0.352
664287	AK097877	AK097877	3024413	CDNA FLJ40558 FIS, CLONE THYMU2002756	0.189	0.361	0.342	0.381	-0.188	0.141	-0.161	-0.335	0.01	0.025	-0.055	-0.124
664812	POU2F1	NM_002697	2885393	POU DOMAIN, CLASS 2, TRANSCRIPTION FACTOR 1	1.261	-0.642	1.869	1.429	-0.449	-1.508	-1.063	-1.107	-0.45	-0.927	-0.706	-0.716
664965	RUNX2	NM_004348	2865938	RUNT-RELATED TRANSCRIPTION FACTOR 2	1.418	0.609	1.226	0.937	-1.146	0.289	-1.423	-0.687	-1.418	-0.116	-0.815	-1.305
665029	PPIL4	NM_139126	3029168	PEPTIDYLPROLYL ISOMERASE (CYCLOPHILIN)-LIKE 4	0.242	0.01	-0.048	0.425	0.089	-0.53	-0.238	-0.162	-0.228	-0.483	-0.571	-0.507
665039	PTCRA	NM_138296	2875906	PRE T-CELL ANTIGEN RECEPTOR ALPHA	0.335	0.781	0.58	0.255	-0.634	-0.277	-0.335	0.204	-0.972	-0.484	-0.168	-0.519
665248	HDGF2	NM_032631	2865788	HEPATOMA-DERIVED GROWTH FACTOR-RELATED PROTEIN 2	1.499	1.178	0.88	0.622	-0.292	-0.396	0.107	-0.609	0.526	-0.84	-0.259	-0.586
665433	A_23_P215382				1.68	0.949	-0.281	0.979	-0.724	-1.009	-1.425	-1.981	-0.867	-1.652	-1.31	-0.888
665549	RRAGA	NM_006570	2870449	RAS-RELATED GTP BINDING A	0.927	1.008	1.085	1.015	-0.003	-1.38	-0.462	0.022	-0.144	-1.991	-1.978	-1.84
665809	ICOSLG				0.108	0.994	0.525	0.443	-0.122	-0.661	-0.368	-0.109	-0.091	-0.708	-0.195	-0.222
665899	A_24_P856176				0.412	0.144	0.176	0.256	-0.028	-0.394	0.016	-0.136	-0.74	-0.24	-0.317	-0.357
666014	TSPYL4	NM_021648	2869964	TSPY-LIKE 4	0.012	0.716	0.532	-0.155	1.009	-0.616	-0.774	0.548	-1.314	-3.019	-1.909	-2.012
666071	ZADH2	NM_175907	2873881	HYPOTHETICAL PROTEIN BC010734	1.455	0.426	0.619	2.368	-1.091	-1.222	-0.771	-0.646	-1.05	-0.586	-1.291	0.615
666308	GNA15	NM_002068	2862484	GUANINE NUCLEOTIDE BINDING PROTEIN (G PROTEIN), ALPHA 15 (GQ CLASS)	1.39	0.74	1.564	1.004	-0.739	-0.198	-0.4	-1.219	-0.652	-0.714	-0.882	-0.133
666476	MYADM	NM_138373	2870123	MYELOID-ASSOCIATED DIFFERENTIATION MARKER	0.61	0.53	0.832	0.809	-0.442	-1.337	0.03	-0.31	0.142	-0.417	0.029	-0.494
666986	LOC388122	XM_497133	2892658	SIMILAR TO LAMININ RECEPTOR 1 (RIBOSOMAL PROTEIN SA)	0.473	-0.193	0.2	0.696	-0.561	-0.563	-0.119	-0.311	-0.3	-0.594	-0.554	-0.37
667368	ATF4C	XM_933001	2988927	SIMILAR TO ACTIVATING TRANSCRIPTION FACTOR 4	0.389	0.406	0.571	0.601	-0.133	-0.267	-0.29	0.269	-0.736	-0.996	-0.965	-0.544
667587	NKX2-1	NM_003317	2866687	THYROID TRANSCRIPTION FACTOR 1	1.001	0.117	1.173	1.038	-0.851	-0.662	-0.873	-0.931	0.375	-1.334	-0.034	-0.676
667687	ANO9	NM_001012302	2878278	TRANSMEMBRANE PROTEIN 16J	1.326	0.127	1.575	1.407	-1.056	-0.03	-0.782	-1.229	-1.258	-1.051	0.149	-0.479
667755	MTMR1	NM_003828	2862873	MYOTUBULARIN RELATED PROTEIN 1	0.477	0.343	0.674	-0.219	0.009	0.48	0.248	-0.418	-0.891	-1.011	-0.366	-1.744
668047	GNAQ	NM_002072	2867093	GUANINE NUCLEOTIDE BINDING PROTEIN (G PROTEIN), Q POLYPEPTIDE	1.491	0.925	0.22	1.196	-0.811	0.492	0.201	-1.275	-1.135	-1.563	-0.217	-0.778
668053	THC2406749				0.486	0.398	-0.012	0.743	0.216	-0.13	-0.463	0.073	-0.831	-0.79	-0.197	-0.618
668166	AA903523	AA903523	2870489	FILAMIN B, BETA (ACTIN BINDING PROTEIN 278)	0.82	1.259	0.307	0.565	-0.315	-0.899	-1.532	-1.666	-1.266	-1.669	-1.096	-1.384
668211	AHR	NM_001621	2881065	ARYL HYDROCARBON RECEPTOR	-0.068	0.394	0.981	1.372	-0.326	-1.616	0.957	-0.237	-2.164	-1.433	-1.921	-2.37
668976	PIK3C2B	NM_002646	3028798	PHOSPHOINOSITIDE-3-KINASE, CLASS 2, BETA POLYPEPTIDE	0.983	1.042	1.228	0.724	0.262	-0.903	-0.464	-1.231	-1.212	-1.29	-0.225	-0.946
669027	GNA11	NM_002067	2866489	GUANINE NUCLEOTIDE BINDING PROTEIN (G PROTEIN), ALPHA 11 (GQ CLASS)	0.279	1.216	0.805	0.42	0.171	-0.238	-0.015	-0.314	-0.356	-0.646	-0.271	0.173
669174	BX115897	BX115897	2872865	TRANSCRIPTION FACTOR 4	2.476	1.216	1.639	-0.093	-1.446	-1.116	-0.762	-0.374	-0.188	-1.902	-0.805	-0.233
669520	HABP4	NM_014282	2858175	HYALURONAN BINDING PROTEIN 4	0.887	-0.045	1.363	1.392	-1.336	0.087	-0.349	-0.983	-0.293	-0.106	-0.684	-0.916
669898	ICAM1	NM_000201	3024095	INTERCELLULAR ADHESION MOLECULE 1 (CD54), HUMAN RHINOVIRUS RECEPTOR	0.561	0.316	0.369	0.849	0.043	-1.171	0.038	0.465	-1.393	-1.386	-1.341	-0.905
669999	KIAA0922	NM_015196	2873173	KIAA0922	0.853	0.664	-0.382	0.761	0.518	-0.429	-0.207	0.628	-1.525	-0.803	-2.307	-0.787
670271	ENST00000273340				0.78	1.138	0.567	0.743	-0.905	-0.754	0.359	0.297	-0.429	-0.237	-0.217	-1.105
670665	ITPR3	NM_002224	2875713	INOSITOL 1,4,5-TRIPHOSPHATE RECEPTOR, TYPE 3	0.356	0.28	0.828	1.185	-0.014	-0.845	0.032	0.539	-0.787	-0.362	-2.691	-1.624
670759	C9orf100	NM_032818	2861114	CHROMOSOME 9 OPEN READING FRAME 100	-0.049	0.568	1.256	1.348	-0.816	-1.044	-0.36	-1.202	-1.6	-0.794	-0.147	-0.591
671054	BE008305	BE008305			0.286	0.624	0.35	1.041	0.238	-0.556	-0.416	0.236	-0.51	-0.478	-0.389	-1.403
671116	VAV1	NM_005428	2872381	VAV 1 ONCOGENE	0.324	0.692	0.164	0.877	-0.213	-0.013	-0.191	0.621	-0.289	-0.781	-1.068	-1.197
671183	DCUN1D1	NM_020640	2873223	DCN1, DEFECTIVE IN CULLIN NEDDYLATION 1, DOMAIN CONTAINING 1 (S. CEREVISIAE)	0.554	0.805	0.54	0.463	-0.401	-0.683	0.034	0.027	-1.191	-1.763	-0.733	-1.062
671445	LOC653284	AL832834	3002462	HYPOTHETICAL PROTEIN LOC126167	0.974	1.004	0.644	1.177	-0.677	-0.617	-0.825	-0.908	-1.53	-0.806	-0.484	-0.238
671545	SOX4	NM_003107			0.954	0.306	0.916	1.333	0.15	-0.262	-0.444	-0.864	-0.19	-0.243	-0.221	-0.402
671678	LMNA	NM_005572	2865035	LAMIN A/C	0.177	0.401	0.202	0.361	-0.152	-0.137	-0.144	0.253	-0.146	0.015	-0.15	-0.402
672397	BID	NM_197966	2873087	BH3 INTERACTING DOMAIN DEATH AGONIST	1.044	0.669	1.085	0.831	-0.71	-0.495	-0.601	-1.058	-0.05	0.179	0.219	-1.508
672575	VDAC1	NM_003374	3027531	VOLTAGE-DEPENDENT ANION CHANNEL 1	0.354	0.811	-0.234	0.845	1.183	0.118	-0.223	1.013	-1.457	-0.604	-1.771	-0.932
672966	BC007809	BC007809			0.55	0.207	0.376	0.535	0.149	-0.537	-0.141	-0.13	-0.789	-0.45	-0.658	-0.596
673186	CYTSB	NM_152904	2859083	SPECTRIN DOMAIN WITH COILED-COILS 1	1.225	1.535	1.336	1.321	-0.701	-0.407	-0.969	-0.974	-0.463	0.016	-0.854	-0.43
673187	ACP2	NM_001610	2859394	ACID PHOSPHATASE 2, LYSOSOMAL	1.358	0.609	2.012	1.792	-0.916	0.831	-0.302	-0.865	-0.62	-0.305	-0.144	0.171
673308	AHNAK	NM_001620			0.853	0.393	1.017	0.95	-0.755	-0.986	-0.688	0.012	-1.51	-0.264	-1.407	-0.901
673501	ZDHHC23	NM_173570	2887225	ZINC FINGER, DHHC-TYPE CONTAINING 23	0.279	-0.032	0.837	0.724	0.416	-0.052	-0.362	-0.127	-0.818	-0.514	-0.746	-0.171
673710	ZSCAN18	NM_023926	2871027	ZINC FINGER PROTEIN 447	1.752	1.231	1.437	0.983	-0.102	0.752	-0.711	-0.267	-0.665	-0.909	0.283	-0.366
673948	A_24_P392790				0.298	-0.145	0.155	0.585	-0.273	-0.215	0.091	-0.248	-0.426	-0.492	-0.477	-0.394
674084	A_23_P21804				1.037	0.912	0.291	0.306	0.742	-0.189	-0.364	0.669	-0.164	-1.004	-0.787	-1.088
674122	THC2528572				1.074	0.693	0.794	1.358	-0.642	0.12	-1.431	0.09	-1.473	-0.611	-0.82	-1.017
674873	MFGE8	NM_005928			0.791	0.763	0.379	1.875	-1.626	-0.783	-0.716	-0.699	-1.52	-0.949	-0.519	0.155
675418	POP1	NM_015029	2865004	PROCESSING OF PRECURSOR 1, RIBONUCLEASE P/MRP SUBUNIT (S. CEREVISIAE)	0.583	0.659	0.626	0.919	-1.196	-0.434	-1.206	-0.44	-0.939	-0.037	0.025	-1.129
675470	NSMCE4A	NM_017615	2869600	CHROMOSOME 10 OPEN READING FRAME 86	1.278	0.196	0.126	0.437	-0.493	0.725	0.298	-1.507	-2.886	-2.942	-0.388	-2.829
675585	TXK	NM_003328	2863784	TXK TYROSINE KINASE	0.953	0.655	0.812	0.322	-0.424	-0.529	0.008	-0.616	-0.148	-0.518	0.601	-0.153
675678	CD44	NM_000610	2858985	CD44 ANTIGEN (INDIAN BLOOD GROUP)	0.847	0.663	0.834	0.535	0.043	-0.309	-0.664	-0.816	-0.075	-0.363	-0.074	-0.569
675688	BHLHE40	NM_003670	2864904	BASIC HELIX-LOOP-HELIX DOMAIN CONTAINING, CLASS B, 2	0.943	0.719	0.084	0.804	0.075	-0.726	-0.978	0.209	-1.149	-0.441	-0.887	-1.496
676035	A_24_P50509				0.699	0.489	0.347	0.426	-0.108	-0.628	0.024	0.277	-0.257	-0.852	-0.053	-0.356
676082	FNBP1	NM_015033	2862982	FORMIN BINDING PROTEIN 1	-0.087	0.288	-0.015	0.775	0.296	-0.632	0.556	0.596	-4.187	-0.312	-3.258	-2.604
676120	ORAI2	NM_032831	2871586	CHROMOSOME 7 OPEN READING FRAME 19	0.415	-0.052	0.363	0.463	-0.268	-0.435	0.144	-0.09	-0.478	-0.239	-0.284	-0.34
676205	A_24_P685729				0.256	-0.054	0.387	0.164	-0.143	-0.503	-0.19	-0.142	-0.207	-0.453	-0.084	-0.219
676284	A_24_P477475				0.426	0.041	0.407	0.601	-0.753	-0.984	-0.096	-0.322	-0.278	-1.363	-0.368	-1.212
676816	THC2655298				0.372	0.817	0.799	0.012	-0.418	-0.45	0.029	-0.291	-0.317	-0.137	-0.024	-0.301
677439	TPT1	NM_003295			0.089	0.12	0.275	0.097	-0.208	-0.243	-0.139	-0.255	-0.526	-0.033	-0.111	-0.518
677544	SIK1	NM_173354	3027237	SNF1-LIKE KINASE	0.817	0.842	0.565	1.013	0.321	-0.722	-0.412	-0.194	-1.45	-0.128	-1.351	-2.926
677954	CYTSB	BC033618	2859083	SPECTRIN DOMAIN WITH COILED-COILS 1	0.93	1.504	1.08	0.832	-0.268	-0.012	-0.45	-0.484	-1.674	-1.17	-0.875	-0.56
678406	TXN	NM_003329	3011795	THIOREDOXIN	1.225	0.345	0.635	1.285	0.133	-1.287	-0.231	-1.17	-1.026	0.3	-1.016	-1.058
678420	CELSR1	NM_014246	2871346	CADHERIN, EGF LAG SEVEN-PASS G-TYPE RECEPTOR 1 (FLAMINGO HOMOLOG, DROSOPHILA)	1.8	1.166	1.19	0.369	-1.853	-0.925	-0.899	-1.062	-0.25	-1.191	-0.793	0.06
678675	TBC1D24	BX648283	2874860	KIAA1171 PROTEIN	-0.693	0.765	1.018	1.334	1.163	-0.127	0.058	-0.788	-1.605	-1.982	-1.759	-2.203
679032	BC044628	BC044628			1.078	0.79	0.802	0.857	-0.393	-0.914	-1.172	-0.417	-0.4	-1.133	-0.253	-0.706
679246	POU2F2	NM_002698	3029455	POU DOMAIN, CLASS 2, TRANSCRIPTION FACTOR 2	0.866	0.824	-0.074	1.419	-0.307	-0.701	-0.814	-0.659	-0.792	-0.97	-0.281	-0.046
679391	RRAD	NM_004165	2864063	RAS-RELATED ASSOCIATED WITH DIABETES	1.326	-0.139	0.944	0.981	-0.231	-0.212	-0.024	-0.168	-0.159	-0.461	-0.002	-0.22
679460	RPS13	NM_001017	3025209	RIBOSOMAL PROTEIN S13	0.057	0.216	0.152	-0.015	-0.156	-0.164	-0.271	-0.133	NaN	-0.193	-0.183	0.01
679507	NTN3	NM_006181	2873924	NETRIN 2-LIKE (CHICKEN)	0.437	0.711	0.289	0.121	-0.637	-0.006	-0.16	-0.318	-0.148	-0.184	0.066	0.068
679514	HAPLN3	NM_178232	2869324	HYALURONAN AND PROTEOGLYCAN LINK PROTEIN 3	0.804	1.229	0.521	1.167	-0.909	-1.454	-0.954	0.34	-0.983	-0.981	-0.843	-0.827
679519	NUTF2	NM_005796	2862678	NUCLEAR TRANSPORT FACTOR 2	0.532	1.201	0.256	0.309	0.023	-0.264	-0.309	-0.063	-1.791	-1.414	-0.12	-1.156
679986	HYOU1	NM_006389	2871249	HYPOXIA UP-REGULATED 1	0.553	1.145	2.349	0.681	-0.632	-0.48	-0.75	-0.421	-0.611	-0.882	-0.575	-0.391
680257	CR619482	CR619482	3006685	SIMILAR TO RIBOSOMAL PROTEIN S8	0.217	0.054	-0.039	0.142	-0.376	-0.068	-0.488	-0.416	-0.347	-0.196	-0.096	-0.287
680547	HLA-DMB	BC035650	2866692	MAJOR HISTOCOMPATIBILITY COMPLEX, CLASS II, DM BETA	1.794	2.229	0.559	0.528	-0.792	0.635	0.373	0.393	-0.933	-0.1	-1.805	-1.851
680761	M14755	M14755	2870975	ABL1 PROTEIN	0.171	0.009	0.094	0.394	-0.259	-0.436	-0.165	-0.211	-0.691	-0.322	-0.745	-0.86
680826	EEF1G	NM_001404	2865499	EUKARYOTIC TRANSLATION ELONGATION FACTOR 1 GAMMA	0.605	0.113	0.238	0.576	-0.055	-0.472	-0.284	-0.202	-0.5	-0.671	-0.627	-0.321
681009	CERK	NM_022766	3026946	CERAMIDE KINASE	0.387	0.265	1.517	1.37	1.964	-0.898	-0.287	0.59	-1.252	-0.963	-3.278	-3.098
681144	NFIX	NM_002501	2873704	NUCLEAR FACTOR I/X (CCAAT-BINDING TRANSCRIPTION FACTOR)	2.15	0.781	1.09	2.001	0.734	1.038	-0.783	-0.164	-0.851	-0.662	-0.92	-0.917
681286	DNAJA1	NM_001539	3029268	DNAJ (HSP40) HOMOLOG, SUBFAMILY A, MEMBER 1	0.552	0.912	0.81	0.509	-0.184	-0.428	-1	-0.526	-0.33	-0.593	-0.801	-0.084
ONTOGENY cluster 2
Category	Term	Count	%	PValue	Genes	List Total	Pop Hits	Pop Total	Fold Enrichment	Bonferroni	Benjamini	FDR
PANTHER_BP_ALL	BP00061:Protein biosynthesis	23	14.65%	0.004201469595979201	3029168, 3028487, 2873223, 2865125, 2874805, 2876981, 3025978, 2865499, 3026634, 2878381, 2865749, 3025209, 2870449, 2864063, 3027583, 2874157, 2867551, 2859083, 2860544, 3025069, 2858985, 2877030, 2864949,	153	2325	29414	1.9018117928174851	0.6039720642058011	0.14305232724732675	5.218394491886658
PANTHER_BP_ALL	BP00060:Protein metabolism and modification	29	18.47%	0.004759032184207804	2860015, 3029168, 2862702, 2871586, 2875344, 2874805, 2868861, 3028348, 2873178, 2878381, 2873533, 2870909, 2867551, 2870489, 2873704, 3027237, 2878572, 3023704, 2874717, 2874504, 2865499, 2869292, 2863784, 3025209, 2860888, 3027583, 2870091, 3024413, 3029268,	153	3257	29414	1.7117600903835077	0.649882454165891	0.12294519047516439	5.8917250882884575
PANTHER_BP_ALL	BP00104:G-protein mediated signaling	37	23.57%	6.926541297115955E-4	2860015, 2871346, 2862484, 2864904, 2862486, 2867093, 2875713, 2868861, 2866489, 2865035, 2866687, 2861033, 2873178, 3023893, 2867551, 2874554, 2872213, 2868212, 2873881, 3026815, 3025916, 2862873, 2874717, 2873010, 2869964, 3028443, 2864825, 3028798, 3029455, 3025978, 3030018, 3025209, 2870449, 2860072, 2870334, 2863933, 2861114,	153	4056	29414	1.753744956233644	0.14138676406300998	0.07338614518398767	0.8781339295814039
PANTHER_BP_ALL	BP00102:Signal transduction	36	22.93%	0.004580201459252193	2871346, 2862484, 2873223, 2870828, 2862486, 2867093, 2873924, 2875713, 2872381, 2866489, 2861033, 3024095, 3029637, 2872150, 2877838, 2874860, 2868212, 3025916, 2860088, 3028443, 3026946, 3029455, 2865499, 2875455, 2863067, 2865234, 2881065, 2864063, 2860072, 2860888, 2860207, 2860544, 3025069, 2858985, 2859389, 2864949,	153	4356	29414	1.5888294711824125	0.6357660866078048	0.1343545427248818	5.676244995101321
PANTHER_BP_ALL	BP00248:Mesoderm development	10	6.37%	0.0458442071103607	3016349, 2865938, 2870449, 2865749, 3028443, 2869324, 2874504, 2874554, 2866687, 3028607,	153	905	29414	2.1242913371610155	0.999967172024982	0.41921840236363184	44.97425576926717
PANTHER_BP_ALL	BP00044:mRNA transcription regulation	73	46.50%	0.0015537388669798235	2860015, 3029168, 2862486, 3011795, 2875713, 2885393, 3024210, 3024488, 3028348, 2988927, 2873178, 2871027, 2867885, 2871333, 2873533, 2859083, 2872213, 2870489, 2873173, 3027237, 2862873, 2875509, 2874717, 2859366, 2860088, 2878294, 3028443, 3026946, 2887225, 3026634, 2865234, 2943935, 2862982, 3028837, 2874157, 2865788, 2858985, 3029268, 2860200, 2859389, 2872381, 2869324, 2866687, 2865679, 286…	153	10414	29414	1.3476215401338822	0.28971457139548307	0.08196714055810139	1.9598929585647573
PANTHER_BP_ALL	BP00150:MHCI-mediated immunity	42	26.75%	0.006447737456449563	2860015, 2862702, 2865938, 2862486, 2875344, 2873924, 2876205, 2865035, 2866687, 2865679, 2867885, 2865104, 2858175, 3027776, 2867551, 2874554, 2859083, 2858414, 2873881, 3025916, 3027237, 2873173, 3023704, 2878572, 2865004, 2874717, 2871249, 2865125, 2873010, 2876898, 2878294, 3025978, 2865499, 2872949, 3026634, 2865234, 3016349, 2864063, 2875906, 2862982, 2858985, 2861114,	153	5445	29414	1.4829075064369184	0.7590329455266063	0.13264723579615711	7.904263543116752
PANTHER_BP_ALL	BP00224:Cell proliferation and differentiation	12	7.64%	0.04375529754031261	2860015, 2862486, 2874717, 3027583, 3028443, 3026946, 2859083, 2874554, 2870975, 2865679, 2873704, 2861033,	153	1184	29414	1.9484631690514045	0.9999468884122777	0.4212239976100913	43.420946453158194
PANTHER_BP_ALL	BP00149:T-cell mediated immunity	32	20.38%	0.020126978265302364	2865938, 2862486, 2875344, 2866687, 2866692, 3024095, 2865104, 3027776, 2859083, 2858414, 2870489, 2873881, 3025916, 2873173, 3027237, 3023704, 2875509, 2865004, 2865125, 2874504, 3025978, 2865499, 2873087, 2865234, 3016349, 3026634, 2864954, 2875906, 2869848, 2858985, 3025069, 2861114,	153	4138	29414	1.4866959189024411	0.9885881476242131	0.29113120738218434	22.80362420149614
PANTHER_BP_ALL	BP00040:mRNA transcription	49	31.21%	0.006239437984295134	3029168, 2860015, 3011795, 2862486, 2885393, 2875713, 3024210, 3024488, 3028348, 2988927, 2873178, 2871027, 2867885, 2871333, 2873533, 2870909, 2871029, 2859083, 2872213, 2870489, 3027237, 2875509, 2860088, 3026946, 2872949, 3028837, 2865788, 2860200, 2858985, 2864949, 2872381, 2866687, 2865104, 3023893, 2873704, 3025916, 3023704, 2865125, 2865004, 2875314, 3028798, 3025978, 3029455, 2860888, 287…	153	6626	29414	1.4216978470631636	0.7476596778548619	0.14186804875058834	7.6581821543961315
PANTHER_BP_ALL	BP00036:DNA repair	17	10.83%	0.003858873272706131	2871249, 2865125, 2873924, 3029472, 2875314, 3025978, 2876205, 2865679, 2869292, 3016349, 3025209, 3026600, 3027583, 2874860, 2874157, 3026815, 3025477,	153	1465	29414	2.2308684110731893	0.5728390246903793	0.15643546311065737	4.802465221354824
PANTHER_BP_ALL	BP00033:Pyrimidine metabolism	7	4.46%	0.006618533528284567	3029168, 2860015, 2865125, 2875713, 2872213, 2866687, 3026815,	153	321	29414	4.192331969132409	0.7679766560583582	0.12436913417962903	8.105588043271927
PANTHER_BP_ALL	BP00143:Cation transport	34	21.66%	0.019551744040219157	3028487, 2862702, 2865938, 2862486, 2872381, 2866687, 2865195, 2873178, 2878381, 3026600, 2865104, 2859083, 2870489, 3025916, 3027237, 2871249, 2865125, 2874717, 2866306, 3026946, 3025978, 2887225, 2864954, 3026634, 2865234, 2863784, 2864056, 2881065, 2864063, 2860888, 2862982, 3029268, 3028607, 3025477,	153	4462	29414	1.4649135913143085	0.987015380377944	0.30371703613670986	22.22476179102356
PANTHER_BP_ALL	BP00031:Nucleoside, nucleotide and nucleic acid metabolism	30	19.11%	0.022456462185102593	2864904, 2860668, 2874805, 2885393, 3024488, 2876205, 2866687, 2865679, 2988927, 2871027, 2867885, 2865104, 2872213, 2873704, 2859366, 2869964, 2875314, 2878294, 3029455, 2887225, 2872949, 2864056, 3028837, 2865788, 2872735, 2860200, 3025069, 2872865, 2863933, 2864949,	153	3842	29414	1.5011585060885364	0.9932400419399987	0.3001644495773754	25.107445477427405
PANTHER_BP_ALL	BP00204:Cytokinesis	9	5.73%	0.035583793901815826	3016349, 3024095, 2867885, 2885393, 2878278, 3029455, 2860544, 2865679, 3025916,	153	727	29414	2.379966016668015	0.9996547052874999	0.3743029413290565	36.94832718805044
PANTHER_BP_ALL	BP00289:Other metabolism	25	15.92%	0.034401212306001024	2862486, 2870828, 2876981, 2859394, 3024095, 2878381, 2865749, 2863272, 3026600, 2871333, 3023893, 2874554, 2859083, 3025916, 2865125, 2859366, 2876898, 2873010, 3025978, 2872949, 2860888, 2862982, 2858440, 3029268, 2859389,	153	3155	29414	1.5233626466962908	0.9995478561754413	0.38204793518139757	35.95704659231402
PANTHER_BP_ALL	BP00286:Cell structure	33	21.02%	0.0013396334463930408	3029168, 2875344, 2873924, 2885393, 2869324, 2865035, 2861033, 3029637, 2867885, 2865104, 2877838, 2874860, 2874554, 2859083, 2868212, 2873704, 2873881, 2874717, 2876898, 3028798, 3025978, 2863784, 2865234, 2864954, 2864063, 2860072, 2860888, 2862982, 2874157, 2858985, 3025069, 2863933, 2861114,	153	3585	29414	1.7696502310826703	0.2554065711389223	0.09362816891418979	1.6919386576749074
PANTHER_BP_ALL	BP00026:Cholesterol metabolism	11	7.01%	0.027420660223703725	2862486, 2874717, 2865125, 3025318, 2878278, 3028798, 2859083, 2860544, 2865035, 3029268, 2868231,	153	958	29414	2.207444703699155	0.9977944914680612	0.3348791183951296	29.807118553411183
PANTHER_BP_ALL	BP00071:Proteolysis	46	29.30%	4.1135395229365793E-4	2871346, 3028487, 2870828, 2862702, 2865938, 2862486, 2873924, 2885393, 2875713, 3029472, 2876981, 2876205, 3024095, 2873178, 3026600, 2865104, 2871333, 2877838, 2859083, 2874554, 2872213, 2874717, 2876898, 2869964, 2878294, 3028443, 2875314, 3028798, 3029455, 3025978, 2875455, 2863067, 2863784, 2881065, 2870334, 2860888, 2943935, 2874157, 2858440, 2860207, 2858985, 3029268, 2859389, 3025477, 286…	153	5357	29414	1.6508166579431223	0.08654072728376516	0.08654072728376516	0.5223672819445802
PANTHER_BP_ALL:BP00104:G-protein mediated signaling	37 Gene(s)
DAVIDID	DAVID Gene Name	Micro array SeqName	Bright mean	D2A+ mean	D2A- mean
2860015	V-KIT HARDY-ZUCKERMAN 4 FELINE SARCOMA VIRAL ONCOGENE HOMOLOG	KIT	1.31	-0.86625	-0.7305
2860072	ARGININE VASOPRESSIN RECEPTOR 2 (NEPHROGENIC DIABETES INSIPIDUS)	AVPR2	0.738	-0.258	-0.3155
2861033	CENTAURIN, GAMMA 3	AGAP3	0.6015	-0.67875	-0.7235
2861114	CHROMOSOME 9 OPEN READING FRAME 100	C9orf100	0.78075	-0.8555	-0.783
2862484	GUANINE NUCLEOTIDE BINDING PROTEIN (G PROTEIN), ALPHA 15 (GQ CLASS)	GNA15	1.1745	-0.639	-0.59525
2862486	HYPOTHETICAL PROTEIN FROM CLONE 1659351	CBWD5	0.31425	-0.42325	-1.837
2862873	MYOTUBULARIN RELATED PROTEIN 1	MTMR1	0.31875	0.07975	-1.003
2863933	GATA BINDING PROTEIN 3	GATA3	0.6795	-0.16475	-0.54425
2864825	CHOLINE KINASE ALPHA	CHKA	1.08575	-0.575	-0.9715
2864904	BASIC HELIX-LOOP-HELIX DOMAIN CONTAINING, CLASS B, 2	BHLHE40	0.6375	-0.355	-0.99325
2865035	LAMIN A/C	LMNA	0.28525	-0.045	-0.17075
2866489	GUANINE NUCLEOTIDE BINDING PROTEIN (G PROTEIN), ALPHA 11 (GQ CLASS)	GNA11	0.68	-0.099	-0.275
2866687	THYROID TRANSCRIPTION FACTOR 1	NKX2-1	0.83225	-0.82925	-0.41725
2867093	GUANINE NUCLEOTIDE BINDING PROTEIN (G PROTEIN), Q POLYPEPTIDE	GNAQ	0.958	-0.34825	-0.92325
2867551	RIBOSOMAL PROTEIN L7A	RPL7A	0.1865	-0.14475	-0.23125
2868212	TUMOR NECROSIS FACTOR RECEPTOR SUPERFAMILY, MEMBER 11A, NFKB ACTIVATOR	TNFRSF11A	0.92825	-0.58925	-1.2975
2868861	GRANZYME K (GRANZYME 3; TRYPTASE II)	GZMK	0.7705	-0.854	-0.70775
2869964	TSPY-LIKE 4	TSPYL4	0.27625	0.04175	-2.0635
2870334	LMBR1 DOMAIN CONTAINING 2	LMBRD2	1.52275	0.32975	-1.11675
2870449	RAS-RELATED GTP BINDING A	RRAGA	1.00875	-0.45575	-1.48825
2871346	CADHERIN, EGF LAG SEVEN-PASS G-TYPE RECEPTOR 1 (FLAMINGO HOMOLOG, DROSOPHILA)	CELSR1	1.13125	-1.18475	-0.5435
2872213	HISTONE DEACETYLASE 10	HDAC10	0.41025	-0.38375	-0.38925
2873010	PEROXISOMAL BIOGENESIS FACTOR 16	PEX16	0.39175	-0.022	-1.08275
2873178	MAP KINASE INTERACTING SERINE/THREONINE KINASE 2	MKNK2	0.813	-0.3195	-1.20675
2873881	HYPOTHETICAL PROTEIN BC010734	ZADH2	1.217	-0.9325	-0.578
2874554	GDP-MANNOSE PYROPHOSPHORYLASE A	GMPPA	0.43075	-0.211	-1.2045
2874717	PROMYELOCYTIC LEUKEMIA	PML	0.125	0.0165	-0.14425
2875713	INOSITOL 1,4,5-TRIPHOSPHATE RECEPTOR, TYPE 3	ITPR3	0.66225	-0.072	-1.366
3023893	DEHYDROGENASE/REDUCTASE (SDR FAMILY) MEMBER 1	DHRS1	1.02475	-0.151	-0.3325
3025209	RIBOSOMAL PROTEIN S13	RPS13	0.1025	-0.181	-0.122
3025916	HYPOTHETICAL PROTEIN LOC339047	THC2504848	0.2355	-0.0675	-0.192
3025978	MAJOR HISTOCOMPATIBILITY COMPLEX, CLASS II, DP ALPHA 1	HLA-DPA1	1.046	-0.74125	-0.147
3026815	CRYSTALLIN, ZETA (QUINONE REDUCTASE)-LIKE 1	CRYZL1	1.36925	0.12925	-0.8165
3028443	MILK FAT GLOBULE-EGF FACTOR 8 PROTEIN	MFGE8	0.934	-0.97975	-0.5475
3028798	PHOSPHOINOSITIDE-3-KINASE, CLASS 2, BETA POLYPEPTIDE	PIK3C2B	0.99425	-0.584	-0.91825
3029455	POU DOMAIN, CLASS 2, TRANSCRIPTION FACTOR 2	POU2F2	0.75875	-0.62025	-0.52225
3030018	WAS PROTEIN HOMOLOGY REGION 2 DOMAIN CONTAINING 1	WHDC1	0.3915	-0.378	-0.159
PANTHER_BP_ALL:BP00286:Cell structure	33 Gene(s)
DAVIDID	DAVID Gene Name	Micro array SeqName	Bright mean	D2A+ mean	D2A- mean
2858985	CD44 ANTIGEN (INDIAN BLOOD GROUP)	CD44	0.71975	-0.4365	-0.27025
2859083	SPECTRIN DOMAIN WITH COILED-COILS 1	CYTSB	1.35425	-0.76275	-0.43275
2860072	ARGININE VASOPRESSIN RECEPTOR 2 (NEPHROGENIC DIABETES INSIPIDUS)	AVPR2	0.738	-0.258	-0.3155
2860888	MITOGEN-ACTIVATED PROTEIN KINASE KINASE KINASE 8	MAP3K8	0.9335	0.06525	-1.08725
2861033	CENTAURIN, GAMMA 3	AGAP3	0.6015	-0.67875	-0.7235
2861114	CHROMOSOME 9 OPEN READING FRAME 100	C9orf100	0.78075	-0.8555	-0.783
2862982	FORMIN BINDING PROTEIN 1	FNBP1	0.24025	0.204	-2.59025
2863784	TXK TYROSINE KINASE	TXK	0.6855	-0.39025	-0.0545
2863933	GATA BINDING PROTEIN 3	GATA3	0.6795	-0.16475	-0.54425
2864063	RAS-RELATED ASSOCIATED WITH DIABETES	RRAD	0.778	-0.15875	-0.2105
2864954	GLYCOPROTEIN (TRANSMEMBRANE) NMB	GPNMB	0.62225	-0.12475	-0.9325
2865035	LAMIN A/C	LMNA	0.28525	-0.045	-0.17075
2865104	NOTCH HOMOLOG 2 (DROSOPHILA) N-TERMINAL LIKE	NOTCH2NL	0.6515	-0.2855	-1.04425
2865234	AHNAK NUCLEOPROTEIN (DESMOYOKIN)	AHNAK	0.7265	-0.597	-1.08775
2867885	PHD FINGER PROTEIN 20	PHF20	0.3855	-0.175	-0.6995
2868212	TUMOR NECROSIS FACTOR RECEPTOR SUPERFAMILY, MEMBER 11A, NFKB ACTIVATOR	TNFRSF11A	0.92825	-0.58925	-1.2975
2869324	HYALURONAN AND PROTEOGLYCAN LINK PROTEIN 3	HAPLN3	0.93025	-0.74425	-0.9085
2873704	NUCLEAR FACTOR I/X (CCAAT-BINDING TRANSCRIPTION FACTOR)	NFIX	1.5055	0.20625	-0.8375
2873881	HYPOTHETICAL PROTEIN BC010734	ZADH2	1.217	-0.9325	-0.578
2873924	NETRIN 2-LIKE (CHICKEN)	NTN3	0.3895	-0.28025	-0.0495
2874157	ONCOMODULIN	OCM2	0.64325	-0.59525	-0.78525
2874554	GDP-MANNOSE PYROPHOSPHORYLASE A	GMPPA	0.43075	-0.211	-1.2045
2874717	PROMYELOCYTIC LEUKEMIA	PML	0.125	0.0165	-0.14425
2874860	KIAA1171 PROTEIN	TBC1D24	0.606	0.0765	-1.88725
2875344	DUAL-SPECIFICITY TYROSINE-(Y)-PHOSPHORYLATION REGULATED KINASE 1A	DYRK1A	0.33575	0.159	-0.71425
2876898	ABHYDROLASE DOMAIN CONTAINING 2	ABHD2	0.69175	-0.14825	-0.95475
2877838	CALSYNTENIN 3	CLSTN3	0.7765	0.241	-0.7835
2885393	POU DOMAIN, CLASS 2, TRANSCRIPTION FACTOR 1	POU2F1	0.97925	-1.03175	-0.69975
3025069	DNA SEGMENT ON CHROMOSOME X AND Y (UNIQUE) 155 EXPRESSED SEQUENCE, ISOFORM 1	SFRS17A	0.97725	-0.155	-0.88125
3025978	MAJOR HISTOCOMPATIBILITY COMPLEX, CLASS II, DP ALPHA 1	HLA-DPA1	1.046	-0.74125	-0.147
3028798	PHOSPHOINOSITIDE-3-KINASE, CLASS 2, BETA POLYPEPTIDE	PIK3C2B	0.99425	-0.584	-0.91825
3029168	PEPTIDYLPROLYL ISOMERASE (CYCLOPHILIN)-LIKE 4	PPIL4	0.15725	-0.21025	-0.44725
3029637	CHEMOKINE (C MOTIF) LIGAND 2	XCL2	0.611	-0.33	-1.00325
PANTHER_BP_ALL:BP00044:mRNA transcription regulation	73 Gene(s)
DAVIDID	DAVID Gene Name	Micro array SeqName	Bright mean	D2A+ mean	D2A- mean
2858175	HYALURONAN BINDING PROTEIN 4	HABP4	0.89925	-0.64525	-0.49975
2858414	GLUTARYL-COENZYME A DEHYDROGENASE	GCDH	0.97275	-0.0415	-0.605
2858985	CD44 ANTIGEN (INDIAN BLOOD GROUP)	CD44	0.71975	-0.4365	-0.27025
2859083	SPECTRIN DOMAIN WITH COILED-COILS 1	CYTSB	1.35425	-0.76275	-0.43275
2859366	RNA BINDING MOTIF, SINGLE STRANDED INTERACTING PROTEIN	RBMS3	0.67175	-0.0305	-0.99725
2859389	OLFACTORY RECEPTOR, FAMILY 10, SUBFAMILY R, MEMBER 2	OR10R2	0.5295	-0.4115	-0.853
2859394	ACID PHOSPHATASE 2, LYSOSOMAL	ACP2	1.44275	-0.313	-0.2245
2860015	V-KIT HARDY-ZUCKERMAN 4 FELINE SARCOMA VIRAL ONCOGENE HOMOLOG	KIT	1.31	-0.86625	-0.7305
2860088	ARTEMIN	ARTN	0.35625	-0.176	-0.1595
2860200	ACTIVATING TRANSCRIPTION FACTOR 6	AA576497	0.678	0.8715	-1.91025
2860888	MITOGEN-ACTIVATED PROTEIN KINASE KINASE KINASE 8	MAP3K8	0.9335	0.06525	-1.08725
2861033	CENTAURIN, GAMMA 3	AGAP3	0.6015	-0.67875	-0.7235
2861114	CHROMOSOME 9 OPEN READING FRAME 100	C9orf100	0.78075	-0.8555	-0.783
2862486	HYPOTHETICAL PROTEIN FROM CLONE 1659351	CBWD5	0.31425	-0.42325	-1.837
2862873	MYOTUBULARIN RELATED PROTEIN 1	MTMR1	0.31875	0.07975	-1.003
2862982	FORMIN BINDING PROTEIN 1	FNBP1	0.24025	0.204	-2.59025
2863784	TXK TYROSINE KINASE	TXK	0.6855	-0.39025	-0.0545
2863933	GATA BINDING PROTEIN 3	GATA3	0.6795	-0.16475	-0.54425
2865004	PROCESSING OF PRECURSOR 1, RIBONUCLEASE P/MRP SUBUNIT (S. CEREVISIAE)	POP1	0.69675	-0.819	-0.52
2865104	NOTCH HOMOLOG 2 (DROSOPHILA) N-TERMINAL LIKE	NOTCH2NL	0.6515	-0.2855	-1.04425
2865125	NUCLEAR RECEPTOR SUBFAMILY 1, GROUP I, MEMBER 3	NR1I3	0.6295	0.2665	-0.70125
2865234	AHNAK NUCLEOPROTEIN (DESMOYOKIN)	AHNAK	0.7265	-0.597	-1.08775
2865679	HISTONE 1, H3A	HIST1H3E	0.2385	0.087	-0.337
2865788	HEPATOMA-DERIVED GROWTH FACTOR-RELATED PROTEIN 2	HDGF2	1.04475	-0.2975	-0.28975
2866687	THYROID TRANSCRIPTION FACTOR 1	NKX2-1	0.83225	-0.82925	-0.41725
2867885	PHD FINGER PROTEIN 20	PHF20	0.3855	-0.175	-0.6995
2869324	HYALURONAN AND PROTEOGLYCAN LINK PROTEIN 3	HAPLN3	0.93025	-0.74425	-0.9085
2869600	CHROMOSOME 10 OPEN READING FRAME 86	NSMCE4A	0.50925	-0.24425	-2.26125
2870091	PROTEIN-SERINE/THREONINE KINASE	Z25424	0.71125	-0.377	-1.106
2870123	MYELOID-ASSOCIATED DIFFERENTIATION MARKER	MYADM	0.69525	-0.51475	-0.185
2870489	FILAMIN B, BETA (ACTIN BINDING PROTEIN 278)	FLNB	0.76	-0.83675	-0.878
2870975	ABL1 PROTEIN	M14755	0.167	-0.26775	-0.6545
2871027	ZINC FINGER PROTEIN 447	ZSCAN18	1.35075	-0.082	-0.41425
2871333	CHROMOSOME 1 OPEN READING FRAME 84	C1orf84	0.208	-0.10475	-0.4585
2872213	HISTONE DEACETYLASE 10	HDAC10	0.41025	-0.38375	-0.38925
2872381	VAV 1 ONCOGENE	VAV1	0.51425	0.051	-0.83375
2872735	TRANSCRIPTION FACTOR 7 (T-CELL SPECIFIC, HMG-BOX)	TCF7	0.693	-0.305	-0.6135
2872865	TRANSCRIPTION FACTOR 4	BX115897	1.3095	-0.9245	-0.782
2873173	KIAA0922	KIAA0922	0.474	0.1275	-1.3555
2873178	MAP KINASE INTERACTING SERINE/THREONINE KINASE 2	MKNK2	0.813	-0.3195	-1.20675
2873533	DUAL SPECIFICITY PHOSPHATASE 1	BG950086	0.74475	-0.30625	-0.51675
2873704	NUCLEAR FACTOR I/X (CCAAT-BINDING TRANSCRIPTION FACTOR)	NFIX	1.5055	0.20625	-0.8375
2874157	ONCOMODULIN	OCM2	0.64325	-0.59525	-0.78525
2874554	GDP-MANNOSE PYROPHOSPHORYLASE A	GMPPA	0.43075	-0.211	-1.2045
2874717	PROMYELOCYTIC LEUKEMIA	PML	0.125	0.0165	-0.14425
2875314	ACTIVATING TRANSCRIPTION FACTOR 4 (TAX-RESPONSIVE ENHANCER ELEMENT B67)	ATF4	0.3365	-0.079	-0.55875
2875455	PROTOCADHERIN 21	PCDH21	1.05875	-0.72725	-0.85625
2875509	ZINC FINGER PROTEIN 568	BC002534	1.339	-0.39575	-0.30225
2875713	INOSITOL 1,4,5-TRIPHOSPHATE RECEPTOR, TYPE 3	ITPR3	0.66225	-0.072	-1.366
2877573	HYPOTHETICAL PROTEIN FLJ20825	AK000832	1.20625	-1.0455	-0.82275
2878294	ECTONUCLEOSIDE TRIPHOSPHATE DIPHOSPHOHYDROLASE 6 (PUTATIVE FUNCTION)	ENTPD6	0.76475	-0.5065	-0.38975
2878381	RIBOSOMAL PROTEIN S3	RPS3	0.26825	-0.24125	-0.222
2885393	POU DOMAIN, CLASS 2, TRANSCRIPTION FACTOR 1	POU2F1	0.97925	-1.03175	-0.69975
2887225	ZINC FINGER, DHHC-TYPE CONTAINING 23	ZDHHC23	0.452	-0.03125	-0.56225
2943935	HYPOTHETICAL PROTEIN MGC9913	LOC100128252	1.45225	-0.899	-0.34025
2988927	SIMILAR TO ACTIVATING TRANSCRIPTION FACTOR 4	ATF4C	0.49175	-0.10525	-0.81025
3011795	THIOREDOXIN	TXN	0.8725	-0.63875	-0.7
3023704	CALCIUM BINDING PROTEIN P22	AA765447	1.0475	0.15	-0.5745
3023893	DEHYDROGENASE/REDUCTASE (SDR FAMILY) MEMBER 1	DHRS1	1.02475	-0.151	-0.3325
3024210	CDNA FLJ39732 FIS, CLONE SMINT2015810	AK097051	0.8065	-0.24925	-0.2565
3024488	SRY (SEX DETERMINING REGION Y)-BOX 4	SOX4	1.0085	-0.775	-0.88975
3025477	G PROTEIN BETA SUBUNIT-LIKE	GBL	0.43825	-0.35725	-0.3515
3025865	NUCLEAR PRELAMIN A RECOGNITION FACTOR	NARF	0.44275	-0.23725	-0.8995
3025978	MAJOR HISTOCOMPATIBILITY COMPLEX, CLASS II, DP ALPHA 1	HLA-DPA1	1.046	-0.74125	-0.147
3026634	HYPOTHETICAL PROTEIN FLJ25778	UBN2	0.3565	0.57325	-2.46425
3026946	CERAMIDE KINASE	CERK	0.88475	0.34225	-2.14775
3027237	SNF1-LIKE KINASE	SIK1	0.80925	-0.25175	-1.46375
3028348	DUAL SPECIFICITY PHOSPHATASE 2	DUSP2	0.68475	-0.13175	-0.8405
3028443	MILK FAT GLOBULE-EGF FACTOR 8 PROTEIN	MFGE8	0.934	-0.97975	-0.5475
3028798	PHOSPHOINOSITIDE-3-KINASE, CLASS 2, BETA POLYPEPTIDE	PIK3C2B	0.99425	-0.584	-0.91825
3028837	HELICASE, LYMPHOID-SPECIFIC	HELLS	0.92925	-0.4135	-1.29175
3029168	PEPTIDYLPROLYL ISOMERASE (CYCLOPHILIN)-LIKE 4	PPIL4	0.15725	-0.21025	-0.44725
3029268	DNAJ (HSP40) HOMOLOG, SUBFAMILY A, MEMBER 1	DNAJA1	0.69575	-0.5345	-0.452
PANTHER_BP_ALL:BP00036:DNA repair	17 Gene(s)
DAVIDID	DAVID Gene Name	Micro array SeqName	Bright mean	D2A+ mean	D2A- mean
2865125	NUCLEAR RECEPTOR SUBFAMILY 1, GROUP I, MEMBER 3	NR1I3	0.6295	0.2665	-0.70125
2865679	HISTONE 1, H3A	HIST1H3E	0.2385	0.087	-0.337
2869292	INTERLEUKIN-1 RECEPTOR-ASSOCIATED KINASE 3	IRAK3	0.786	-0.63375	-1.454
2871249	HYPOXIA UP-REGULATED 1	HYOU1	1.182	-0.57075	-0.61475
2873924	NETRIN 2-LIKE (CHICKEN)	NTN3	0.3895	-0.28025	-0.0495
2874157	ONCOMODULIN	OCM2	0.64325	-0.59525	-0.78525
2874860	KIAA1171 PROTEIN	TBC1D24	0.606	0.0765	-1.88725
2875314	ACTIVATING TRANSCRIPTION FACTOR 4 (TAX-RESPONSIVE ENHANCER ELEMENT B67)	ATF4	0.3365	-0.079	-0.55875
2876205	DCP1 DECAPPING ENZYME HOMOLOG A (S. CEREVISIAE)	DCP1A	0.54925	-0.7795	-0.84125
3016349	WD REPEAT DOMAIN 40A	WDR40A	0.64825	-0.48525	-0.487
3025209	RIBOSOMAL PROTEIN S13	RPS13	0.1025	-0.181	-0.122
3025477	G PROTEIN BETA SUBUNIT-LIKE	GBL	0.43825	-0.35725	-0.3515
3025978	MAJOR HISTOCOMPATIBILITY COMPLEX, CLASS II, DP ALPHA 1	HLA-DPA1	1.046	-0.74125	-0.147
3026600	N-ACETYLGLUCOSAMINE KINASE	NAGK	0.7795	-0.581	-0.06225
3026815	CRYSTALLIN, ZETA (QUINONE REDUCTASE)-LIKE 1	CRYZL1	1.36925	0.12925	-0.8165
3027583	RIBOSOMAL PROTEIN S15A	X62691	0.0675	-0.135	-0.2235
3029472	ESTERASE D/FORMYLGLUTATHIONE HYDROLASE	ESD	0.5995	-0.13225	-2.29475
PANTHER_BP_ALL:BP00102:Signal transduction	36 Gene(s)
DAVIDID	DAVID Gene Name	Micro array SeqName	Bright mean	D2A+ mean	D2A- mean
2861033	CENTAURIN, GAMMA 3	AGAP3	0.6015	-0.67875	-0.7235
2862484	GUANINE NUCLEOTIDE BINDING PROTEIN (G PROTEIN), ALPHA 15 (GQ CLASS)	GNA15	1.1745	-0.639	-0.59525
2862486	HYPOTHETICAL PROTEIN FROM CLONE 1659351	CBWD5	0.31425	-0.42325	-1.837
2866489	GUANINE NUCLEOTIDE BINDING PROTEIN (G PROTEIN), ALPHA 11 (GQ CLASS)	GNA11	0.68	-0.099	-0.275
2867093	GUANINE NUCLEOTIDE BINDING PROTEIN (G PROTEIN), Q POLYPEPTIDE	GNAQ	0.958	-0.34825	-0.92325
2868212	TUMOR NECROSIS FACTOR RECEPTOR SUPERFAMILY, MEMBER 11A, NFKB ACTIVATOR	TNFRSF11A	0.92825	-0.58925	-1.2975
2870828	RAB43, MEMBER RAS ONCOGENE FAMILY	RAB43	0.76925	-0.2925	-0.58475
2871346	CADHERIN, EGF LAG SEVEN-PASS G-TYPE RECEPTOR 1 (FLAMINGO HOMOLOG, DROSOPHILA)	CELSR1	1.13125	-1.18475	-0.5435
2872150	TYROSINE 3-MONOOXYGENASE/TRYPTOPHAN 5-MONOOXYGENASE ACTIVATION PROTEIN, GAMMA POLYPEPTIDE	YWHAG	0.91375	-0.67225	-0.548
2872381	VAV 1 ONCOGENE	VAV1	0.51425	0.051	-0.83375
2873223	DCN1, DEFECTIVE IN CULLIN NEDDYLATION 1, DOMAIN CONTAINING 1 (S. CEREVISIAE)	DCUN1D1	0.5905	-0.25575	-1.18725
2873924	NETRIN 2-LIKE (CHICKEN)	NTN3	0.3895	-0.28025	-0.0495
2874860	KIAA1171 PROTEIN	TBC1D24	0.606	0.0765	-1.88725
2875713	INOSITOL 1,4,5-TRIPHOSPHATE RECEPTOR, TYPE 3	ITPR3	0.66225	-0.072	-1.366
2877838	CALSYNTENIN 3	CLSTN3	0.7765	0.241	-0.7835
3024095	INTERCELLULAR ADHESION MOLECULE 1 (CD54), HUMAN RHINOVIRUS RECEPTOR	ICAM1	0.52375	-0.15625	-1.25625
3029637	CHEMOKINE (C MOTIF) LIGAND 2	XCL2	0.611	-0.33	-1.00325
PANTHER_BP_ALL:BP00040:mRNA transcription	49 Gene(s)
DAVIDID	DAVID Gene Name	Micro array SeqName	Bright mean	D2A+ mean	D2A- mean
2858985	CD44 ANTIGEN (INDIAN BLOOD GROUP)	CD44	0.71975	-0.4365	-0.27025
2859083	SPECTRIN DOMAIN WITH COILED-COILS 1	CYTSB	1.35425	-0.76275	-0.43275
2860015	V-KIT HARDY-ZUCKERMAN 4 FELINE SARCOMA VIRAL ONCOGENE HOMOLOG	KIT	1.31	-0.86625	-0.7305
2860088	ARTEMIN	ARTN	0.35625	-0.176	-0.1595
2860200	ACTIVATING TRANSCRIPTION FACTOR 6	AA576497	0.678	0.8715	-1.91025
2860888	MITOGEN-ACTIVATED PROTEIN KINASE KINASE KINASE 8	MAP3K8	0.9335	0.06525	-1.08725
2862486	HYPOTHETICAL PROTEIN FROM CLONE 1659351	CBWD5	0.31425	-0.42325	-1.837
2863933	GATA BINDING PROTEIN 3	GATA3	0.6795	-0.16475	-0.54425
2864949	NMDA RECEPTOR REGULATED 1-LIKE	NARG1L	0.75325	-0.2635	-0.51125
2865004	PROCESSING OF PRECURSOR 1, RIBONUCLEASE P/MRP SUBUNIT (S. CEREVISIAE)	POP1	0.69675	-0.819	-0.52
2865104	NOTCH HOMOLOG 2 (DROSOPHILA) N-TERMINAL LIKE	NOTCH2NL	0.6515	-0.2855	-1.04425
2865125	NUCLEAR RECEPTOR SUBFAMILY 1, GROUP I, MEMBER 3	NR1I3	0.6295	0.2665	-0.70125
2865788	HEPATOMA-DERIVED GROWTH FACTOR-RELATED PROTEIN 2	HDGF2	1.04475	-0.2975	-0.28975
2866687	THYROID TRANSCRIPTION FACTOR 1	NKX2-1	0.83225	-0.82925	-0.41725
2867885	PHD FINGER PROTEIN 20	PHF20	0.3855	-0.175	-0.6995
2870091	PROTEIN-SERINE/THREONINE KINASE	Z25424	0.71125	-0.377	-1.106
2870334	LMBR1 DOMAIN CONTAINING 2	LMBRD2	1.52275	0.32975	-1.11675
2870489	FILAMIN B, BETA (ACTIN BINDING PROTEIN 278)	FLNB	0.76	-0.83675	-0.878
2870909	SPASTIN	SPAST	0.70475	0.93675	-2.49525
2871027	ZINC FINGER PROTEIN 447	ZSCAN18	1.35075	-0.082	-0.41425
2871029	TUMOR PROTEIN P53 INDUCIBLE NUCLEAR PROTEIN 1	TP53INP1	0.841	-1.07425	-0.642
2871333	CHROMOSOME 1 OPEN READING FRAME 84	C1orf84	0.208	-0.10475	-0.4585
2872213	HISTONE DEACETYLASE 10	HDAC10	0.41025	-0.38375	-0.38925
2872381	VAV 1 ONCOGENE	VAV1	0.51425	0.051	-0.83375
2872735	TRANSCRIPTION FACTOR 7 (T-CELL SPECIFIC, HMG-BOX)	TCF7	0.693	-0.305	-0.6135
2872865	TRANSCRIPTION FACTOR 4	BX115897	1.3095	-0.9245	-0.782
2872949	ZINC FINGER, FYVE DOMAIN CONTAINING 26	ZFYVE26	0.295	0.94375	-1.75425
2873178	MAP KINASE INTERACTING SERINE/THREONINE KINASE 2	MKNK2	0.813	-0.3195	-1.20675
2873533	DUAL SPECIFICITY PHOSPHATASE 1	BG950086	0.74475	-0.30625	-0.51675
2873704	NUCLEAR FACTOR I/X (CCAAT-BINDING TRANSCRIPTION FACTOR)	NFIX	1.5055	0.20625	-0.8375
2875314	ACTIVATING TRANSCRIPTION FACTOR 4 (TAX-RESPONSIVE ENHANCER ELEMENT B67)	ATF4	0.3365	-0.079	-0.55875
2875509	ZINC FINGER PROTEIN 568	BC002534	1.339	-0.39575	-0.30225
2875713	INOSITOL 1,4,5-TRIPHOSPHATE RECEPTOR, TYPE 3	ITPR3	0.66225	-0.072	-1.366
2885393	POU DOMAIN, CLASS 2, TRANSCRIPTION FACTOR 1	POU2F1	0.97925	-1.03175	-0.69975
2988927	SIMILAR TO ACTIVATING TRANSCRIPTION FACTOR 4	ATF4C	0.49175	-0.10525	-0.81025
3011795	THIOREDOXIN	TXN	0.8725	-0.63875	-0.7
3023704	CALCIUM BINDING PROTEIN P22	AA765447	1.0475	0.15	-0.5745
3023893	DEHYDROGENASE/REDUCTASE (SDR FAMILY) MEMBER 1	DHRS1	1.02475	-0.151	-0.3325
3024210	CDNA FLJ39732 FIS, CLONE SMINT2015810	AK097051	0.8065	-0.24925	-0.2565
3024488	SRY (SEX DETERMINING REGION Y)-BOX 4	SOX4	1.0085	-0.775	-0.88975
3025916	HYPOTHETICAL PROTEIN LOC339047	THC2504848	0.2355	-0.0675	-0.192
3025978	MAJOR HISTOCOMPATIBILITY COMPLEX, CLASS II, DP ALPHA 1	HLA-DPA1	1.046	-0.74125	-0.147
3026946	CERAMIDE KINASE	CERK	0.88475	0.34225	-2.14775
3027237	SNF1-LIKE KINASE	SIK1	0.80925	-0.25175	-1.46375
3028348	DUAL SPECIFICITY PHOSPHATASE 2	DUSP2	0.68475	-0.13175	-0.8405
3028798	PHOSPHOINOSITIDE-3-KINASE, CLASS 2, BETA POLYPEPTIDE	PIK3C2B	0.99425	-0.584	-0.91825
3028837	HELICASE, LYMPHOID-SPECIFIC	HELLS	0.92925	-0.4135	-1.29175
3029168	PEPTIDYLPROLYL ISOMERASE (CYCLOPHILIN)-LIKE 4	PPIL4	0.15725	-0.21025	-0.44725
3029455	POU DOMAIN, CLASS 2, TRANSCRIPTION FACTOR 2	POU2F2	0.75875	-0.62025	-0.52225
PANTHER_BP_ALL:BP00150:MHCI-mediated immunity	42 Gene(s)
DAVIDID	DAVID Gene Name	Micro array SeqName	Bright mean	D2A+ mean	D2A- mean
2858175	HYALURONAN BINDING PROTEIN 4	HABP4	0.89925	-0.64525	-0.49975
2858414	GLUTARYL-COENZYME A DEHYDROGENASE	GCDH	0.97275	-0.0415	-0.605
2858985	CD44 ANTIGEN (INDIAN BLOOD GROUP)	CD44	0.71975	-0.4365	-0.27025
2859083	SPECTRIN DOMAIN WITH COILED-COILS 1	CYTSB	1.35425	-0.76275	-0.43275
2860015	V-KIT HARDY-ZUCKERMAN 4 FELINE SARCOMA VIRAL ONCOGENE HOMOLOG	KIT	1.31	-0.86625	-0.7305
2861114	CHROMOSOME 9 OPEN READING FRAME 100	C9orf100	0.78075	-0.8555	-0.783
2862486	HYPOTHETICAL PROTEIN FROM CLONE 1659351	CBWD5	0.31425	-0.42325	-1.837
2862702	TUMOR NECROSIS FACTOR, ALPHA-INDUCED PROTEIN 3	TNFAIP3	0.6635	-0.181	-0.5245
2862982	FORMIN BINDING PROTEIN 1	FNBP1	0.24025	0.204	-2.59025
2864063	RAS-RELATED ASSOCIATED WITH DIABETES	RRAD	0.778	-0.15875	-0.2105
2865004	PROCESSING OF PRECURSOR 1, RIBONUCLEASE P/MRP SUBUNIT (S. CEREVISIAE)	POP1	0.69675	-0.819	-0.52
2865035	LAMIN A/C	LMNA	0.28525	-0.045	-0.17075
2865104	NOTCH HOMOLOG 2 (DROSOPHILA) N-TERMINAL LIKE	NOTCH2NL	0.6515	-0.2855	-1.04425
2865125	NUCLEAR RECEPTOR SUBFAMILY 1, GROUP I, MEMBER 3	NR1I3	0.6295	0.2665	-0.70125
2865234	AHNAK NUCLEOPROTEIN (DESMOYOKIN)	AHNAK	0.7265	-0.597	-1.08775
2865499	EUKARYOTIC TRANSLATION ELONGATION FACTOR 1 GAMMA	EEF1G	0.383	-0.25325	-0.52975
2865679	HISTONE 1, H3A	HIST1H3E	0.2385	0.087	-0.337
2865938	RUNT-RELATED TRANSCRIPTION FACTOR 2	RUNX2	1.0475	-0.74175	-0.9135
2866687	THYROID TRANSCRIPTION FACTOR 1	NKX2-1	0.83225	-0.82925	-0.41725
2867551	RIBOSOMAL PROTEIN L7A	RPL7A	0.1865	-0.14475	-0.23125
2867885	PHD FINGER PROTEIN 20	PHF20	0.3855	-0.175	-0.6995
2871249	HYPOXIA UP-REGULATED 1	HYOU1	1.182	-0.57075	-0.61475
2872949	ZINC FINGER, FYVE DOMAIN CONTAINING 26	ZFYVE26	0.295	0.94375	-1.75425
2873010	PEROXISOMAL BIOGENESIS FACTOR 16	PEX16	0.39175	-0.022	-1.08275
2873173	KIAA0922	KIAA0922	0.474	0.1275	-1.3555
2873881	HYPOTHETICAL PROTEIN BC010734	ZADH2	1.217	-0.9325	-0.578
2873924	NETRIN 2-LIKE (CHICKEN)	NTN3	0.3895	-0.28025	-0.0495
2874554	GDP-MANNOSE PYROPHOSPHORYLASE A	GMPPA	0.43075	-0.211	-1.2045
2874717	PROMYELOCYTIC LEUKEMIA	PML	0.125	0.0165	-0.14425
2875344	DUAL-SPECIFICITY TYROSINE-(Y)-PHOSPHORYLATION REGULATED KINASE 1A	DYRK1A	0.33575	0.159	-0.71425
2875906	PRE T-CELL ANTIGEN RECEPTOR ALPHA	PTCRA	0.48775	-0.2605	-0.53575
2876205	DCP1 DECAPPING ENZYME HOMOLOG A (S. CEREVISIAE)	DCP1A	0.54925	-0.7795	-0.84125
2876898	ABHYDROLASE DOMAIN CONTAINING 2	ABHD2	0.69175	-0.14825	-0.95475
2878294	ECTONUCLEOSIDE TRIPHOSPHATE DIPHOSPHOHYDROLASE 6 (PUTATIVE FUNCTION)	ENTPD6	0.76475	-0.5065	-0.38975
2878572	EUKARYOTIC ELONGATION FACTOR-2 KINASE	EEF2K	1.3695	-0.77675	-0.93025
3016349	WD REPEAT DOMAIN 40A	WDR40A	0.64825	-0.48525	-0.487
3023704	CALCIUM BINDING PROTEIN P22	AA765447	1.0475	0.15	-0.5745
3025916	HYPOTHETICAL PROTEIN LOC339047	THC2504848	0.2355	-0.0675	-0.192
3025978	MAJOR HISTOCOMPATIBILITY COMPLEX, CLASS II, DP ALPHA 1	HLA-DPA1	1.046	-0.74125	-0.147
3026634	HYPOTHETICAL PROTEIN FLJ25778	UBN2	0.3565	0.57325	-2.46425
3027237	SNF1-LIKE KINASE	SIK1	0.80925	-0.25175	-1.46375
3027776	TAP BINDING PROTEIN (TAPASIN)	TAPBP	0.338	-0.10725	-0.32025
PANTHER_BP_ALL:BP00224:Cell proliferation and differentiation	12 Gene(s)
DAVIDID	DAVID Gene Name	Micro array SeqName	Bright mean	D2A+ mean	D2A- mean
2859083	SPECTRIN DOMAIN WITH COILED-COILS 1	CYTSB	1.35425	-0.76275	-0.43275
2860015	V-KIT HARDY-ZUCKERMAN 4 FELINE SARCOMA VIRAL ONCOGENE HOMOLOG	KIT	1.31	-0.86625	-0.7305
2861033	CENTAURIN, GAMMA 3	AGAP3	0.6015	-0.67875	-0.7235
2862486	HYPOTHETICAL PROTEIN FROM CLONE 1659351	CBWD5	0.31425	-0.42325	-1.837
2865679	HISTONE 1, H3A	HIST1H3E	0.2385	0.087	-0.337
2870975	ABL1 PROTEIN	M14755	0.167	-0.26775	-0.6545
2873704	NUCLEAR FACTOR I/X (CCAAT-BINDING TRANSCRIPTION FACTOR)	NFIX	1.5055	0.20625	-0.8375
2874554	GDP-MANNOSE PYROPHOSPHORYLASE A	GMPPA	0.43075	-0.211	-1.2045
2874717	PROMYELOCYTIC LEUKEMIA	PML	0.125	0.0165	-0.14425
3026946	CERAMIDE KINASE	CERK	0.88475	0.34225	-2.14775
3027583	RIBOSOMAL PROTEIN S15A	X62691	0.0675	-0.135	-0.2235
3028443	MILK FAT GLOBULE-EGF FACTOR 8 PROTEIN	MFGE8	0.934	-0.97975	-0.5475
CLUSTER 3
micro array SeqID	Micro array SeqName	Accesion #	DAVIDID	DAVID Gene Name	Bright #1	Bright #2	Bright #3	Bright #4	D2A+ #1	D2A+ #2	D2A+ #3	D2A+ #4	D2A- #1	D2A- #2	D2A- #3	D2A- #4
640560	ENST00000399966	BC032901			0.428	0.207	0.149	0.859	-0.512	0.396	0.628	0.772	-1.37	-0.81	-0.413	-1.432
640991	FAM27A	BC073976	3001199	FAMILY WITH SEQUENCE SIMILARITY 27, MEMBER C	-0.709	-0.61	-0.787	-0.327	0.476	0.708	0.688	-0.23	-0.071	-0.123	0.236	0.351
641101	GPRC5C	AK000249	2863690	G PROTEIN-COUPLED RECEPTOR, FAMILY C, GROUP 5, MEMBER C	-0.475	-0.516	-0.526	-0.078	0.204	0.658	0.399	0.599	-0.212	-0.221	0.325	0.172
641496	THEM5	NM_182578	2869420	THIOESTERASE SUPERFAMILY MEMBER 5	-0.407	-0.124	-0.11	-0.024	0.491	0.305	0.112	0.191	0.061	0.266	0.13	-0.013
641831	A_24_P230195				-0.465	-0.367	-0.217	-0.038	0.428	0.762	0.521	0.165	0.134	0.525	0.332	0.17
641882	HSPA4	NM_002154	2873073	HEAT SHOCK 70KDA PROTEIN 4	0.309	0.038	0.906	0.103	-0.759	-0.028	0.682	0.477	-1.095	-0.747	-1.794	-2.036
642081	AY172962	AY172962	2865236	IMMUNOGLOBULIN LAMBDA CONSTANT 1 (MCG MARKER)	-0.647	-0.121	-0.169	-0.235	0.393	0.213	0.309	0.421	0.077	0.068	0.105	0.159
642375	PHRF1	NM_020901	3026156	CTD-BINDING SR-LIKE PROTEIN RA9	-0.027	-0.127	-0.034	-0.015	0.613	0.424	0.39	0.447	0.019	0.431	0.33	-0.025
642782	LAMC1	NM_002293	3027042	LAMININ, GAMMA 1 (FORMERLY LAMB2)	-0.459	-0.077	-0.361	-0.21	0.149	0.015	0.276	0.261	-0.033	0.028	0.067	0.166
643077	CHD7	NM_017780	2860509	CHROMODOMAIN HELICASE DNA BINDING PROTEIN 7	-0.511	-0.604	-1.046	-0.108	0.764	2.242	1.666	1.3	-0.126	-0.179	1.314	-0.532
643190	TNNI3	NM_000363	3026897	TROPONIN I TYPE 3 (CARDIAC)	0.053	-0.517	-0.691	0.025	0.787	0.536	0.733	1.312	0.046	-0.408	-0.373	-0.301
643287	UPP1	BC047030	2943426	URIDINE PHOSPHORYLASE 1	-0.683	-0.397	-0.734	-0.128	1.287	0.963	0.548	0.246	0.115	0.095	-0.183	0.71
643524	BC031954	BC031954	3025988	ZINC FINGER PROTEIN 628	-0.187	-0.05	-0.085	-0.109	0.084	0.335	0.104	0.219	-0.004	-0.121	0.008	-0.048
643763	KLHL21	NM_014851	2865343	KELCH-LIKE 21 (DROSOPHILA)	-0.1	-0.297	-0.485	0.108	0.489	0.145	0.45	0.417	0.142	0.097	0.081	-0.087
644748	A_24_P493100				0.735	0.937	-0.208	-0.515	0.423	0.346	0.26	1.25	-1.354	-0.918	-0.562	-1.004
644761	AW361634				-1.116	-1.045	-1.02	-1.447	1.253	0.514	0.3	1.453	1.523	-0.122	-0.315	-0.626
644845	A_24_P925559				-0.562	-0.437	-0.05	-0.095	0.684	0.496	0.247	0.253	0.138	-0.096	0.033	0.051
645098	RTCD1	BU537444			-0.662	-0.283	-0.728	-0.287	0.69	0.662	0.592	0.676	-2.272	-1.05	-0.668	-0.63
645158	A_32_P30014				-0.043	-0.398	-0.441	-0.447	0.533	0.325	0.425	0.473	0.524	0.057	0.139	-0.238
645326	TEX264	NM_015926	2861025	TESTIS EXPRESSED SEQUENCE 264	-0.485	-0.592	-0.816	0.089	0.201	1.05	0.215	1.105	-0.378	-0.792	-0.21	-0.188
645419	LCORL	NM_153686	2875473	TRANSCRIPTION FACTOR MLR1	0.301	-0.11	0.617	0.211	0.106	2.173	0.163	-0.612	-0.949	-1.831	-1.967	-1.95
645808	RFPL3	NM_006604	2874029	RET FINGER PROTEIN-LIKE 3	-1.041	-0.319	-0.145	-0.202	1.152	0.233	0.795	0.466	-0.347	-0.42	-0.211	0.336
646176	A_23_P89506				-0.715	-1.092	-0.879	-1.132	0.063	0.774	1.352	1.307	-0.511	-0.383	-1.282	-0.583
646501	NPNT	NM_001033047	3025914	NEPHRONECTIN	-0.548	0.039	-0.282	-0.208	0.362	0.491	0.319	0.22	-0.089	0.437	0.135	0.427
646645	PSMC4	NM_006503	2860895	PROTEASOME (PROSOME, MACROPAIN) 26S SUBUNIT, ATPASE, 4	-0.11	0.347	0.86	0.935	0.195	-0.57	0.695	-0.022	-0.585	-0.704	-0.644	-0.942
647144	A_24_P264004				0.472	0.065	0.496	0.181	0.854	0.092	0.971	0.324	-0.298	-0.521	-0.8	-0.775
647232	PQBP1	NM_005710	3017219	POLYGLUTAMINE BINDING PROTEIN 1	0.589	-0.033	-0.288	0.136	0.137	0.773	0.482	0.472	-0.848	-0.76	-1.274	-2.945
648298	ENST00000303697	AB040926	3029601	KIAA1493 PROTEIN	0.041	-0.193	-0.113	-0.878	0.483	0.41	0.586	0.352	0.122	-0.076	0.135	-0.048
648393	GPR135	NM_022571	3026453	G PROTEIN-COUPLED RECEPTOR 135	-0.392	-0.252	-0.075	-0.139	0.29	0.093	0.288	0.169	-0.051	0.034	0.025	0.293
650635	AA779434	AA779434	3026138	EUKARYOTIC TRANSLATION INITIATION FACTOR 2, SUBUNIT 3 GAMMA, 52KDA	0.65	-0.094	0.627	0.153	0.245	0.486	0.683	1.025	-0.209	-0.14	-0.79	-0.365
650825	ALDH7A1	NM_001182	2870739	ALDEHYDE DEHYDROGENASE 7 FAMILY, MEMBER A1	-0.259	-0.73	-0.321	-0.438	0.542	-0.238	0.593	0.336	0.174	0.404	0.08	0.3
651285	AK123655	AK123655	2859164	UBIQUITIN CARBOXYL-TERMINAL HYDROLASE L5	-0.805	0.044	-0.802	-0.854	0.623	1.405	0.536	0.301	-0.951	-0.055	-0.394	-0.934
651473	HDAC4	NM_006037	2866395	HISTONE DEACETYLASE 4	-0.813	-0.357	-1.503	-0.388	0.909	1.237	0.011	1.154	0.579	-0.264	-0.026	0.06
651808	CPZ	NM_001014448	3028786	CARBOXYPEPTIDASE Z	-0.455	-0.215	-0.009	-0.367	0.079	0.174	0.299	0.261	-0.169	0.25	0.158	0.107
651873	MPL	NM_005373	2875421	MYELOPROLIFERATIVE LEUKEMIA VIRUS ONCOGENE	-0.763	-0.011	-0.096	-0.408	1.453	0.722	2.68	0.474	-0.718	-0.138	-0.513	0.273
652695	JMJD2C	NM_015061	2862705	JUMONJI DOMAIN CONTAINING 2C	0.581	-0.632	-0.948	-0.784	0.996	1.157	0.621	0.982	0.142	-0.555	-0.297	0.491
653086	A_24_P298886				0.02	0.25	-0.181	-0.298	1.09	0.485	0.549	0.648	-0.236	-0.197	0.231	-0.132
653304	SCARA5	NM_173833	3027753	SCAVENGER RECEPTOR CLASS A, MEMBER 5 (PUTATIVE)	-0.318	-0.238	-0.108	-0.158	0.322	0.172	0.231	-0.044	-0.063	0.227	0.205	0.214
653559	THC2748857				-0.236	-0.006	-0.216	-0.212	0.389	0.145	0.077	0.497	-0.227	-0.084	-0.293	-0.154
653735	ENST00000388762	NM_001034840	2863759	SIMILAR TO RIKEN CDNA 4933434I20	-0.823	-0.274	-0.347	-0.124	0.022	0.607	0.279	0.434	-0.001	0.311	0.525	0.336
653835	COL11A2	NM_080680	2862016	COLLAGEN, TYPE XI, ALPHA 2	-0.096	-0.004	0.031	-0.415	0.482	0.349	0.318	0.342	-0.205	-0.102	-0.068	-0.373
654181	A_32_P13081				-0.108	0.135	-0.342	0.272	0.214	0.534	0.525	0.174	-1.114	-0.428	-0.592	-0.662
654291	ZNF845	BC007307	2873152	HYPOTHETICAL PROTEIN BC007307	-0.055	-0.1	-0.269	-0.476	0.247	0.213	0.34	0.344	-0.109	0.41	0.182	0.215
654872	C17orf91	NM_032895	2871404	HYPOTHETICAL PROTEIN MGC14376	-0.083	0.129	0.164	0.084	0.264	0.13	0.169	0.016	-0.225	-0.175	-0.089	-0.139
655805	CHD2	NM_001271	3023830	CHROMODOMAIN HELICASE DNA BINDING PROTEIN 2	-2	-0.505	-0.187	-2.023	1.25	1.126	0.885	0.377	-0.216	-0.799	-0.941	-2.032
655961	LOC390760	XM_372654	2964418	SIMILAR TO PROTEIN PHOSPHATASE 1, REGULATORY (INHIBITOR) SUBUNIT 2	-0.213	-0.339	-0.247	-0.359	0.698	0.59	0.218	0.002	0.389	0.374	0.477	0.015
656238	LOC100131419	AK128263	2868939	CDNA FLJ46399 FIS, CLONE THYMU3004632	-0.481	0.413	-0.126	-0.187	0.356	0.495	0.327	0.485	-0.413	-1.122	-1.133	-0.81
656911	THC2574403				-0.435	-0.218	-0.373	-0.224	0.275	0.414	-0.012	0.41	0.19	0.436	0.412	-0.035
657267	SEMA5A	NM_003966	2877810	SEMA DOMAIN, SEVEN THROMBOSPONDIN REPEATS (TYPE 1 AND TYPE 1-LIKE), TRANSMEMBRANE DOMAIN (TM) AND SHORT CYTOPLASMIC DOMAIN, (SEMAPHORIN) 5A	-0.32	-0.685	-0.597	-0.675	0.305	0.865	0.651	0.51	-0.586	0.62	0.464	-0.355
657276	CR591764	CR591764			0.725	-0.39	0.441	0.882	0.814	0.397	0.067	0.523	-0.549	-0.741	-0.435	-1.124
657456	FAM179A	XM_373979	3005007	HYPOTHETICAL LOC388938	-0.442	-0.158	0.164	-0.168	0.234	0.476	0.29	0.371	-0.115	0.007	-0.204	0.062
658230	PSMD5	NM_005047	2889334	PROTEASOME (PROSOME, MACROPAIN) 26S SUBUNIT, NON-ATPASE, 5	-0.132	-0.186	-0.182	0.45	0.502	0.189	0.301	0.755	-0.221	-0.099	-0.601	-0.351
658435	GRIN1	NM_021569	2876760	GLUTAMATE RECEPTOR, IONOTROPIC, N-METHYL D-ASPARTATE 1	-0.042	0.102	0.122	0.089	0.143	0.157	0.178	0.196	-0.072	-0.018	-0.087	-0.086
659685	LOC646548				-0.391	-0.094	-0.256	-0.588	0.811	0.666	0.444	0.049	0.046	0.286	0.568	-0.176
660369	ALPK3	NM_020778	2877036	ALPHA-KINASE 3	-0.495	-0.407	-0.455	-0.349	-0.203	0.737	0.322	1.059	-0.019	-0.254	-0.27	-0.483
660473	RBAK	NM_021163	2878206	RB-ASSOCIATED KRAB REPRESSOR	-0.843	-0.254	0.539	-1.424	0.779	1.288	1.585	1.051	-0.734	0.29	-1.04	-0.778
660855	CXCR7	NM_020311	2865781	CHEMOKINE ORPHAN RECEPTOR 1	0.147	0.697	0.68	0.465	0.308	0.105	0.276	0.675	-0.445	-0.289	-0.43	-0.294
660909	BC022826	BC022826	2872525	HYPOTHETICAL PROTEIN	-0.451	0.039	0.207	0.214	0.571	0.197	0.265	0.461	-0.316	-0.452	-0.502	-0.351
661088	CD200R1	NM_138939	2859170	CD200 RECEPTOR 1	-0.424	-0.424	-0.699	-0.412	0.612	0.957	-0.078	0.22	0.05	-0.346	0.036	0.315
661868	THC2757602				-0.104	-0.563	-0.475	-0.606	0.684	0.87	1.082	0.152	0.053	0.651	0.767	0.174
662075	AKR7A3	NM_012067	2888546	ALDO-KETO REDUCTASE FAMILY 7, MEMBER A3 (AFLATOXIN ALDEHYDE REDUCTASE)	-0.544	-0.604	0.008	-0.321	0.755	0.295	0.538	0.642	0.118	0.12	0.125	0.513
662441	BE932552	BE932552	3026867	15 KDA SELENOPROTEIN	-0.261	-0.294	-0.269	-0.3	0.07	0.291	0.046	0.311	0.379	0.433	0.223	-0.175
663104	HLA-E	NM_005516	2890084	MAJOR HISTOCOMPATIBILITY COMPLEX, CLASS I, E	-0.044	-0.313	-0.346	-0.447	0.349	0.28	-0.059	0.312	0.7	0.126	0.134	0.151
663408	PEA15	NM_003768	2865074	PHOSPHOPROTEIN ENRICHED IN ASTROCYTES 15	0.974	-0.024	-0.736	-0.365	0.54	0.776	0.034	1.385	-0.898	-1.284	-1.525	-0.578
663469	A_24_P915634				-0.617	0.026	-0.564	0.026	1.146	1.737	1.052	1.889	-0.664	0.043	-1.287	-0.994
663632	BC013077	BC013077	3024451	MEMBRANE PROTEIN, PALMITOYLATED 6 (MAGUK P55 SUBFAMILY MEMBER 6)	0.11	0.009	0.236	-0.114	0.089	0.421	0.505	0.253	-0.105	-0.475	-0.405	-0.135
663730	BC007817	BC007817	2871201	UROPLAKIN 1A	-0.494	-0.063	-0.199	-0.657	1.04	0.577	0.121	1.07	-0.277	0.17	-0.057	0.132
665370	FAM119A	NM_001018022	2878639	SIMILAR TO FKSG62	-0.204	-0.214	-0.027	-0.223	NaN	0.253	0.064	0.062	-0.004	0.197	0.085	0.285
665427	ENTPD5	NM_001249	3026958	ECTONUCLEOSIDE TRIPHOSPHATE DIPHOSPHOHYDROLASE 5	0.069	-0.674	-0.032	-0.225	0.367	0.813	0.487	1.328	-0.534	-0.364	-0.705	0.105
665456	CNTN2	NM_005076	2859681	CONTACTIN 2 (AXONAL)	-0.487	-0.504	-0.266	-0.122	0.036	0.428	0.568	0.514	0.045	-0.139	-0.125	0.243
665877	ISM2	NM_199265	2864976	THROMBOSPONDIN, TYPE I, DOMAIN CONTAINING 3	-0.306	-0.116	-0.604	-0.322	0.99	0.82	0.152	0.659	-0.477	-0.184	-0.649	0.271
666272	GLS2	NM_013267	2871881	GLUTAMINASE 2 (LIVER, MITOCHONDRIAL)	-0.692	-0.357	-0.052	0.888	1.04	-0.096	0.263	-0.01	-0.927	-1.148	-1.092	-1.143
666727	SFTPA1B	NM_005411	3026436	SURFACTANT, PULMONARY-ASSOCIATED PROTEIN A1	-0.182	-0.03	-0.099	-0.14	0.286	0.102	0.248	0.294	-0.356	0.03	-0.002	0.015
666919	PORCN	NM_203473	2865738	PORCUPINE HOMOLOG (DROSOPHILA)	-0.077	-0.472	-0.307	-0.116	0.287	0.767	0.506	0.177	0.076	-0.144	0.31	0.229
667215	A_24_P332532				-0.055	0.103	0.194	0.045	0.212	0.325	0.259	-0.004	-0.045	-0.137	-0.267	-0.36
667294	C10orf126	BC033839	3025174	CHROMOSOME 10 OPEN READING FRAME 126	-0.268	-0.261	-0.469	-0.498	0.149	0.596	0.275	0.138	0.047	0.059	0.388	0.359
667438	XRCC5	NM_021141	2859035	X-RAY REPAIR COMPLEMENTING DEFECTIVE REPAIR IN CHINESE HAMSTER CELLS 5 (DOUBLE-STRAND-BREAK REJOINING; KU AUTOANTIGEN, 80KDA)	0.444	0.157	0.418	0.179	0.479	0.402	0.175	1	-0.192	-0.136	-0.068	-0.314
667636	TMCO5A	NM_152453	2869446	TRANSMEMBRANE AND COILED-COIL DOMAINS 5	-0.467	-0.126	-0.153	-0.408	0.242	0.148	0.63	0.574	-0.234	0.422	-0.09	-0.028
668236	KLHL7	BC009555	2874265	KELCH-LIKE 7 (DROSOPHILA)	-0.573	-0.527	-0.688	-0.302	1.136	0.471	1.084	0.367	0.593	0.285	-0.512	0.398
668374	HSPB6	NM_144617	2874019	HEAT SHOCK PROTEIN, ALPHA-CRYSTALLIN-RELATED, B6	-0.314	-0.515	-0.47	-0.17	0.043	1.504	1.114	0.554	0.234	-0.596	-0.516	-0.098
668842	ANKS6	BC012981	2966512	ANKYRIN REPEAT AND STERILE ALPHA MOTIF DOMAIN CONTAINING 6	0.179	-0.01	-0.475	0.113	0.493	0.563	0.829	0.28	-0.393	-0.214	-0.654	-0.473
669290	THC2588392				-0.37	-0.268	-0.188	-0.361	0.27	0.019	0.37	-0.107	0.178	0.255	0.215	-0.094
669856	LOC100133781				-0.347	-0.903	-0.254	-1.006	1.184	0.329	1.207	1.034	-0.369	-0.634	-0.836	-0.559
669965	LOC100132815	AK023040			-0.016	-0.392	0.102	0.136	0.372	-0.09	1.276	1.236	-0.667	-0.399	-1.663	-0.655
670046	MASTL	NM_032844	2864372	MICROTUBULE ASSOCIATED SERINE/THREONINE KINASE-LIKE	-1.316	-1.084	0.358	0.304	1.853	0.779	2.114	0.984	-0.816	-0.533	-0.353	-1.221
670320	SH2D1A	NM_002351	3026122	SH2 DOMAIN PROTEIN 1A, DUNCAN'S DISEASE (LYMPHOPROLIFERATIVE SYNDROME)	-0.567	-0.594	-1.131	-0.338	0.859	0.679	0.439	0.462	0.564	-0.12	-0.341	-1.019
670464	AF086427	AF086427	2860732	YTH DOMAIN FAMILY, MEMBER 2	-0.414	-0.42	-0.303	-0.279	0.009	0.142	0.207	0.338	-0.179	0.079	-0.159	0.059
670496	LOC152667	NR_002228	3029482	NIP30-LIKE	0.071	0.334	-0.409	-0.441	0.158	0.496	0.151	0.575	-1.043	-0.271	-1.181	-0.959
670646	ELMOD3	NM_032213	2874016	RNA BINDING MOTIF AND ELMO/CED-12 DOMAIN 1	0.686	0.168	0.123	0.479	0.146	0.328	0.583	0.427	-0.982	-0.698	-0.457	-0.827
670877	A_24_P50294				-0.96	-0.414	-0.214	0.414	1.427	1.29	1.445	0.945	0.037	0.16	-1.73	-0.718
670926	LOC90246	AK023635	2993976	HYPOTHETICAL PROTEIN LOC90246	-0.379	-0.027	-0.006	-0.124	0.024	0.179	0.27	0.267	-0.375	-0.222	-0.037	-0.255
671230	A_24_P917971				-0.435	-0.207	-0.197	-0.352	0.57	-0.013	0.508	0.489	0.108	-0.037	0.242	0.604
671290	THC2550474				-0.238	-0.272	-0.175	0.004	0.599	0.861	0.733	0.262	0.497	0.405	-0.059	0.117
671393	DPYSL3	NM_001387	2863604	DIHYDROPYRIMIDINASE-LIKE 3	-0.361	-0.187	-0.176	-0.131	0.448	-0.013	0.174	0.173	-0.009	-0.028	0.215	0.205
671460	DCX	NM_000555	2866165	DOUBLECORTEX; LISSENCEPHALY, X-LINKED (DOUBLECORTIN)	-0.656	0.212	-0.247	-0.539	0.198	0.431	0.262	0.771	-0.466	-0.134	-0.864	-0.428
672021	NFE2L2	NM_006164	3028245	NUCLEAR FACTOR (ERYTHROID-DERIVED 2)-LIKE 2	0.132	0.336	0.335	0.27	0.792	0.282	0.923	0.425	0.209	-0.929	-0.557	-0.31
672071	AF116702	AF116702	2876571	ACTIN RELATED PROTEIN 2/3 COMPLEX, SUBUNIT 2, 34KDA	-0.301	-0.328	-0.337	-0.01	0.345	0.184	0.476	0.158	0.371	0.295	0.343	-0.064
673056	TULP3	AF045583	2876783	TUBBY LIKE PROTEIN 3	0.531	0.239	0.468	-1.513	0.93	0.767	0.622	0.796	-1.212	-0.394	-1.035	-1.104
673734	AL526449	AL526449	2877238	LEUCINE RICH REPEAT CONTAINING 61	0.011	-0.127	-0.089	-0.551	0.469	0.404	0.366	0.277	0.07	0.238	0.249	-0.078
674444	NOL11	NM_015462	3027333	NUCLEOLAR PROTEIN 11	0.659	0.364	0.225	-0.05	0.765	0.123	0.511	0.104	-0.113	-0.497	-0.411	-1.088
674515	A_24_P466439				0.492	-0.614	0.575	0.912	0.65	0.507	0.659	0.438	-1.03	-0.716	-0.936	-0.658
674806	GTF2A1	NM_015859	2868247	GENERAL TRANSCRIPTION FACTOR IIA, 1, 19/37KDA	0.068	0.512	-0.158	0.23	0.727	1.089	0.679	1.503	0.047	-0.104	-0.48	-0.097
675855	KIRREL3	NM_032531	2859147	KIN OF IRRE LIKE 3 (DROSOPHILA)	-1.642	-0.528	-1.363	-0.014	1.46	0.558	1.26	1.576	-0.411	0.949	-0.163	-0.943
676080	CD79A	NM_001783	3024843	CD79A ANTIGEN (IMMUNOGLOBULIN-ASSOCIATED ALPHA)	-0.428	-0.076	-0.172	0.112	0.428	0.101	0.253	0.372	-0.445	-0.573	-0.356	-0.09
676798	THC2571677				0.071	0.13	0.103	0.764	0.033	0.518	0.277	0.195	-1.509	-0.949	-0.475	-0.582
676893	SFTPC	BC005913	2916729	SURFACTANT, PULMONARY-ASSOCIATED PROTEIN C	-0.134	0.008	-0.194	-0.116	0.28	0.446	0.089	0.113	-0.006	-0.131	-0.069	0.075
677364	A_32_P192354				-0.046	0.522	-0.887	-0.162	0.514	1.396	1.134	0.713	-0.728	-1.105	0.258	-1.206
677914	C16orf74	BC009078	2858921	MGC17624 PROTEIN	-0.261	-0.188	-0.139	-0.1	-0.089	0.3	0.144	0.354	0.204	0.166	0.078	0.105
678643	LOC100128760				1.077	-0.018	0.445	0.662	0.066	1.075	0.946	-0.122	-0.643	-0.88	-0.948	-0.754
679730	THC2726959				-0.288	-0.136	-0.133	-0.156	NaN	0.408	0.154	0.118	-0.035	0.274	0.087	0.201
679805	A_24_P289565				-0.322	-0.527	-0.327	-0.111	0.689	0.828	0.287	1.264	0.36	-0.853	0.198	-0.466
679895	ITIH2	NM_002216	2859894	INTER-ALPHA (GLOBULIN) INHIBITOR H2	-0.26	0.036	-0.663	-0.165	0.675	0.614	0.914	0.326	-0.197	-0.13	0.664	-0.032
679922	CLTB	NM_007097	2915137	CLATHRIN, LIGHT POLYPEPTIDE (LCB)	-1.06	-0.632	-0.758	-0.008	0.287	0.261	1.354	1.893	-0.277	-0.53	-0.154	0.1
680123	SLC43A3	NM_199329	2872345	SOLUTE CARRIER FAMILY 43, MEMBER 3	-0.409	-0.191	-0.597	-0.566	1.03	0.39	0.983	1.93	-0.113	0.872	-0.086	0.135
680225	MEIS3P1	NR_002211	2946591	MEIS1 HOMOLOG 3 (MOUSE) PSEUDOGENE 1	-0.227	0.224	-0.668	-0.335	0.446	1.125	0.977	0.462	-0.503	-0.949	0.007	-0.734
681497	LMNB1	NM_005573	2865609	LAMIN B1	-1.403	-1.784	-0.996	-0.851	1.39	1.223	0.913	1.368	1.501	-1.188	-1.255	-0.789
NO ONTOGENY ASSOCIATED FOR CLUSTER 3
CLUSTER 4
micro array SeqID	Micro array SeqName	Accesion #	DAVIDID	DAVID Gene Name	Bright #1	Bright #2	Bright #3	Bright #4	D2A+ #1	D2A+ #2	D2A+ #3	D2A+ #4	D2A- #1	D2A- #2	D2A- #3	D2A- #4
640782	RASSF4	NM_032023	3029029	RAS ASSOCIATION (RALGDS/AF-6) DOMAIN FAMILY 4	-0.414	-0.932	-0.683	0.045	0.369	0.694	0.123	-0.815	1.561	0.614	1.479	1.429
640827	A_24_P41530				0.092	-0.108	-0.15	0.121	0.032	0.148	-0.092	-0.134	0.384	0.205	0.263	0.299
641439	SGK196	NM_032237	3030017	HYPOTHETICAL PROTEIN FLJ23356	-0.369	-0.355	-0.345	0.021	-1.22	-0.648	-0.508	-0.157	1.518	1.027	0.791	0.012
641541	LGR6	NM_001017403	2874482	LEUCINE-RICH REPEAT-CONTAINING G PROTEIN-COUPLED RECEPTOR 6	-0.447	-0.224	-0.241	-0.129	-0.116	-0.667	0.015	-0.335	0.372	0.442	1.229	0.213
641553	HNRNPA1L2	NM_001011724	2859798	HETEROGENEOUS NUCLEAR RIBONUCLEOPROTEIN A1-LIKE	0.232	0.04	-0.089	0.134	-0.24	-0.128	-0.101	-0.308	0.06	0.32	0.264	0.202
641927	NEK3	NM_002498	2865765	NIMA (NEVER IN MITOSIS GENE A)-RELATED KINASE 3	-0.782	-0.744	-0.396	-0.01	0.366	0.398	-0.107	0.082	0.511	0.271	0.106	0.195
642116	NCOR1	AB028450	2861758	NUCLEAR RECEPTOR CO-REPRESSOR 1	-1.081	-0.961	-0.524	-0.114	0.019	-0.113	0.306	0.084	0.366	0.319	-0.196	0.073
642456	HSPC159	CR593568	3001682	HSPC159 PROTEIN	-0.482	-0.283	-0.264	-0.554	0.31	-0.085	0.132	0.155	0.576	0.298	-0.007	0.133
642837	A_24_P925901				-0.464	-1.414	-0.511	-0.499	-0.079	-0.288	-0.108	-0.703	0.762	0.379	0.284	0.652
642985	GNPTAB	NM_024312	2875527	HYPOTHETICAL PROTEIN DKFZP762B226	-0.718	-0.694	-0.122	-0.531	0.417	0.42	0.038	-0.324	0.075	0.536	0.733	0.801
643064	KRTAP15-1	NM_181623	2857949	KERATIN ASSOCIATED PROTEIN 15-1	-0.463	-0.266	-0.236	-0.509	-0.09	-0.066	-0.087	0.298	0.056	-0.077	0.074	0.352
644440	THC2537367	AL564305	2860107	CLUSTERIN	0.037	-0.129	-0.105	-0.431	0.389	0.04	0.158	-0.104	0.684	0.344	0.247	1
644590	PTGES3	NM_006601	2860947	PROSTAGLANDIN E SYNTHASE 3 (CYTOSOLIC)	-0.745	-0.718	-1.282	-0.473	-0.3	-0.162	-0.175	-0.585	0.664	0.74	1.104	0.178
644684	BX114143	BX114143			-0.729	-0.414	-0.04	-0.435	-0.041	0.272	0.35	0.366	0.66	0.152	0.532	0.154
644798	A_24_P878472				-0.467	-0.381	-0.6	-0.275	0.003	0.164	0.017	0.256	-0.114	0.007	0.524	0.405
644944	THC2641587				-1.11	-0.408	-1.072	-0.837	-0.256	-0.208	-0.439	-0.696	0.307	0.138	0.341	-0.323
645010	KIR2DL2	NM_014219	2878761	KILLER CELL IMMUNOGLOBULIN-LIKE RECEPTOR, TWO DOMAINS, LONG CYTOPLASMIC TAIL, 2	-1.925	-0.394	-0.644	-0.145	0.016	0.71	0.718	0.539	1.734	1.67	1.298	0.375
645215	SLC24A4	NM_153646	2859877	SOLUTE CARRIER FAMILY 24 (SODIUM/POTASSIUM/CALCIUM EXCHANGER), MEMBER 4	-0.54	-0.697	-0.617	-0.624	-0.054	-0.356	-0.369	0.489	0.573	0.136	0.419	0.545
645278	AK023862	AK023862			-0.309	-0.371	-0.474	-0.303	-0.361	0.051	0.003	-0.134	0.61	0.636	0.979	0.442
645374	DRD5	NM_000798	2862023	DOPAMINE RECEPTOR D5	-0.736	-0.811	-0.965	-0.534	0.231	-0.64	-0.077	0.027	0.711	-0.224	1.31	0.504
645510	E2F6	NM_198256	2876227	E2F TRANSCRIPTION FACTOR 6	-0.769	-1.27	0.768	-1.104	-0.262	-1.104	-1.001	-1.019	1.544	0.699	1.57	1.382
646526	OLFM2	NM_058164	2876012	OLFACTOMEDIN 2	-0.573	-0.276	-0.447	0.062	0.056	0.148	-0.281	-0.552	1.538	0.556	0.248	0.758
646764	BDKRB2	NM_000623	3025969	BRADYKININ RECEPTOR B2	-0.121	-0.743	-0.59	-0.308	-0.246	-0.585	-0.326	-0.469	0.599	0.127	0.394	0.089
646965	HCN1	NM_021072	3026818	HYPERPOLARIZATION ACTIVATED CYCLIC NUCLEOTIDE-GATED POTASSIUM CHANNEL 1	-0.831	-0.61	-0.234	-0.311	0.057	-0.021	0.426	0.39	0.411	-0.057	0.268	0.922
647329	DRP2	NM_001939	2859476	DYSTROPHIN RELATED PROTEIN 2	-0.477	-0.476	-0.404	-0.415	0.076	-0.317	0.053	0.261	-0.025	-0.004	0.107	0.38
647494	A_24_P557890				-0.462	-0.355	-0.141	-0.251	0.16	0.042	-0.026	0.311	0.027	0.062	0.02	0.22
647642	ABRA	NM_139166	2870613	ACTIN-BINDING RHO ACTIVATING PROTEIN	-0.47	-0.668	-0.513	-0.025	0.114	0.035	0.483	0.13	0.525	0.277	0.438	0.688
647895	TSSK3	NM_052841	2872318	TESTIS-SPECIFIC SERINE KINASE 3	0.066	-0.04	-0.137	-0.128	-0.068	0.055	-0.169	-0.088	0.346	0.278	0.055	0.392
648437	XPR1	NM_004736	2870427	XENOTROPIC AND POLYTROPIC RETROVIRUS RECEPTOR	-0.385	0.19	0.252	0.64	-0.377	-0.933	0.311	-1.325	1.336	1.059	1.134	0.596
648479	AK056855	AK056855	2874665	HYPOTHETICAL PROTEIN FLJ32293	-0.055	0.074	-0.217	-0.33	-0.208	0.173	-0.203	-0.35	0.529	0.368	0.155	0.29
648757	THC2720710				-0.094	-0.448	-0.239	-0.133	-0.18	-0.002	0.004	0.206	0.558	0.602	1.122	0.2
648762	FGFBP2	NM_031950	3028991	KSP37 PROTEIN	-0.9	-0.757	-0.838	-0.63	1.017	0.464	0.508	0.11	1.638	1.063	1.457	2.195
648868	GRIK2	NM_021956	2858445	GLUTAMATE RECEPTOR, IONOTROPIC, KAINATE 2	-0.761	-0.318	-0.416	-0.278	-0.075	-0.517	-0.178	0.31	0.238	0.163	0.389	0.824
648976	C1orf225	NM_001013642	2871948	HYPOTHETICAL LOC388610	-0.376	-0.331	-0.33	-0.548	-0.007	-0.726	-0.077	-0.233	0.542	0.591	0.065	0.038
648987	LOC643201	BC052945	2858189	SIMILAR TO HYPOTHETICAL PROTEIN	-0.247	-0.129	-0.012	-0.204	0.057	0.105	-0.243	-0.191	0.57	0.326	0.588	0.381
649048	EFNA1	NM_004428	2877234	EPHRIN-A1	-0.073	-0.152	-0.126	-0.322	0.057	0.031	0.051	-0.039	0.343	0.152	0.17	0.022
649114	PCDHGA2	NM_032009	2864840	PROTOCADHERIN GAMMA SUBFAMILY A, 2	-0.655	-0.43	-0.182	0.054	0.233	-0.163	0.208	0.259	0.206	0.477	0.261	0.399
649116	MFSD4	NM_181644	2863912	MAJOR FACILITATOR SUPERFAMILY DOMAIN CONTAINING 4	-0.82	-0.235	0.048	-0.256	-0.279	0.014	-0.767	-0.622	0.224	0.658	0.255	0.804
649417	X15667	X15667	3915	GLUTATHIONE PEROXIDASE 1	-0.557	-0.565	-0.392	-0.432	-0.126	0.269	0.172	0.186	0.436	-0.331	-0.017	0.473
649603	LOC646090				-0.107	-0.292	-0.376	-0.4	-0.016	-0.425	-0.192	0.091	-0.02	0.717	0.261	0.409
649910	TTC14	NM_133462	2859168	TETRATRICOPEPTIDE REPEAT DOMAIN 14	-0.838	-0.961	0.131	-0.98	0.442	0.564	0.107	-0.736	1.046	0.21	1.152	1.694
649925	TF	NM_001063	2874388	TRANSFERRIN	-0.035	-0.14	-0.145	-0.27	-0.381	-0.31	-0.06	-0.051	0.191	0.247	0.502	0.25
650207	SCARA3	NM_182826	3027831	SCAVENGER RECEPTOR CLASS A, MEMBER 3	-0.841	-1.157	-0.393	-0.427	0.195	-0.263	0.405	0.512	0.302	0.42	0.762	0.775
650283	PAFAH2	NM_000437	2872641	PLATELET-ACTIVATING FACTOR ACETYLHYDROLASE 2, 40KDA	-0.812	-0.297	-0.409	-0.819	1.417	0.316	-0.164	0.043	0.923	1.128	0.888	1.112
650308	CA5A	NM_001739	2861003	CARBONIC ANHYDRASE VA, MITOCHONDRIAL	-0.535	-0.064	-0.07	-0.321	-0.556	-0.151	-0.06	0.044	0.554	0.389	0.844	0.14
650789	A_24_P358215				0.057	0.069	-0.043	0.176	0.068	-0.199	-0.196	-0.183	0.316	0.22	0.115	0.396
651088	SSTR2	NM_001050	3029522	SOMATOSTATIN RECEPTOR 2	-0.201	-0.156	-0.075	-0.208	0.04	0.219	0.236	0.686	0.323	0.152	0.328	0.577
651146	A_24_P470809				-0.276	-1.065	-0.006	-0.05	-0.203	0.213	-0.334	-0.564	0.959	0.816	0.505	1.604
651571	AK098134	AK098134			-0.191	-0.118	-0.103	-0.297	-0.033	0.005	0.184	0.001	0.093	0.256	0.209	0.186
652131	THC2561267				-1.057	-0.519	-0.098	-0.975	-0.328	-0.377	-0.642	-0.815	1.091	-0.112	0.18	1.131
652896	THC2780599				-0.641	-0.136	-0.414	-0.402	-0.138	-0.096	0.137	-0.125	0.409	0.229	-0.008	0.696
653113	A3GALT2	XM_060537	2867247	ALPHA 1,3-GALACTOSYLTRANSFERASE 2 (ISOGLOBOTRIAOSYLCERAMIDE SYNTHASE)	-0.367	-0.625	-0.591	-0.664	-0.212	-0.325	-0.472	0.029	-0.063	-0.102	0.818	0.611
653157	ADAM32	NM_145004	2872764	ADAM METALLOPEPTIDASE DOMAIN 32	-0.659	-0.552	-0.51	-0.269	0.021	-0.247	-0.051	0.581	0.426	0.253	0.636	0.15
653327	FAT2	NM_001447	2878658	FAT TUMOR SUPPRESSOR HOMOLOG 2 (DROSOPHILA)	-0.436	-0.16	-0.409	-0.371	0.063	0.238	-0.061	-0.061	0.128	-0.142	0.227	0.472
653806	AB051445	AB051445	2858982	SEC14-LIKE 2 (S. CEREVISIAE)	-0.211	-0.405	-0.472	-0.345	0.122	-0.107	-0.577	0.453	0.143	1.558	0.998	1.427
654395	DCC	NM_005215	2860100	DELETED IN COLORECTAL CARCINOMA	-0.289	-0.125	-0.327	-0.416	-0.108	0.081	-0.146	0.178	-0.005	-0.035	-0.016	0.109
654434	THC2629736				-0.361	-0.275	-0.048	-0.525	-0.187	-0.141	-0.205	-0.101	0.249	0.865	0.085	0.915
654499	AB034694	AB034694	145609	ENDOMUCIN	-0.398	-0.432	-0.525	-0.602	-0.173	-0.691	-0.379	-0.039	0.007	0.243	0.528	0.378
655263	CORIN	NM_006587	2879277	CORIN, SERINE PEPTIDASE	-0.049	-0.058	-0.364	-0.159	-0.023	-0.282	-0.041	0.003	0.429	0.215	0.737	0.104
655350	TSGA10IP	NM_152762	3026471	TESTIS SPECIFIC, 10 INTERACTING PROTEIN	-0.297	-0.805	-0.467	-0.434	0.153	-0.333	-0.337	0.089	0.122	0.026	0.252	0.408
655428	MYH1	NM_005963	2870723	MYOSIN, HEAVY POLYPEPTIDE 1, SKELETAL MUSCLE, ADULT	-0.824	-0.359	-0.69	-0.465	-0.003	-0.173	-0.1	0.321	0.341	0.104	0.119	0.183
655482	MAPK15	NM_139021	2859998	MITOGEN-ACTIVATED PROTEIN KINASE 15	-0.609	-0.848	-0.453	-0.138	-0.094	0.212	0.211	0.152	0.058	0.251	0.309	-0.008
655560	AY295762	AY295762	2881538	SWI/SNF RELATED, MATRIX ASSOCIATED, ACTIN DEPENDENT REGULATOR OF CHROMATIN, SUBFAMILY A, MEMBER 2	0.182	-1.24	-0.191	-0.26	-0.611	0.597	-0.076	-0.487	1.532	0.97	1.062	2.324
655977	THC2681733				-0.575	-0.289	-0.582	-0.365	0.005	0.151	0.244	0.781	0.763	0.055	0.456	1.214
655994	ZP1	NM_207341	2863512	ZONA PELLUCIDA GLYCOPROTEIN 1 (SPERM RECEPTOR)	-0.215	-0.494	-0.336	-0.332	0.204	-0.102	0.03	0.015	0.002	0.392	-0.01	0.481
656172	LAX1	NM_017773	2877855	LYMPHOCYTE TRANSMEMBRANE ADAPTOR 1	-0.91	-0.834	-0.512	-0.21	0.28	0.701	-0.126	-0.27	0.143	1.169	0.783	1.237
656534	AF070620	AF070620			-0.79	-0.979	-0.528	-0.521	-0.288	-0.55	0.814	0.172	0.755	0.254	0.73	0.527
656897	C1orf61	AK095622	2869760	CHROMOSOME 1 OPEN READING FRAME 61	-0.412	-0.536	-0.176	-0.288	0.061	0.063	-0.116	0.162	0.655	-0.075	0.31	0.255
657155	KRT13	NM_002274	3024302	KERATIN 13	-0.552	-0.461	-0.296	-0.936	0.819	-0.168	0.57	0.308	0.098	0.576	0.536	0.69
657392	STOM	NM_198194	2863028	STOMATIN	-0.76	-0.515	-0.922	-0.297	0.511	-0.247	0.342	-1.061	0.462	1.283	0.858	1.031
657466	SLC29A3	NM_018344	2867037	SOLUTE CARRIER FAMILY 29 (NUCLEOSIDE TRANSPORTERS), MEMBER 3	0.195	-0.336	-0.268	-0.263	-0.359	-0.072	-0.408	-0.225	0.407	0.423	0.541	0.307
657481	FAM102B	NM_001010883	3025004	FAMILY WITH SEQUENCE SIMILARITY 102, MEMBER B	-2.046	-1.187	-1.129	-0.063	0.738	0.07	0.449	-1.458	1.047	1.01	1.557	1.554
658631	A_24_P935114				-0.281	-1.194	-0.248	-1.315	0.249	0.595	-0.002	-0.854	0.978	1.149	0.427	1.516
658687	BARX2	NM_003658	2875305	BARH-LIKE HOMEOBOX 2	-0.433	-0.552	-0.29	-0.524	0.394	0.251	-0.087	-0.123	-0.054	-0.309	-0.305	-0.497
659119	RFPL1S	NR_002727	2915601	RET FINGER PROTEIN-LIKE 1 ANTISENSE	-1.08	-0.393	-0.759	-0.576	-0.079	-0.11	-0.004	-0.903	0.687	0.536	0.125	1.208
659140	HFE	NM_139006	2863133	HEMOCHROMATOSIS	-0.221	-0.31	-0.443	-0.489	-0.014	-0.058	-0.199	0.431	0.322	0.038	0.094	0.547
659548	CLCA2	NM_006536	3029619	CHLORIDE CHANNEL, CALCIUM ACTIVATED, FAMILY MEMBER 2	-0.391	-0.213	-0.288	-0.207	-0.024	-0.213	-0.112	-0.016	0.145	-0.073	0.241	0.448
659760	PEF1	NM_012392	2866651	PEF PROTEIN WITH A LONG N-TERMINAL HYDROPHOBIC DOMAIN	-0.14	-1.18	-0.576	-0.787	0.351	-0.344	0.146	-0.578	0.041	0.947	0.353	0.976
660267	C5AR1	NM_001736	2857961	COMPLEMENT COMPONENT 5A RECEPTOR 1	-0.268	-0.14	-0.108	-0.243	0.087	-0.309	-0.284	-0.005	0.022	0.3	0.249	0.319
660308	FAM84A	NM_145175	2876070	FAMILY WITH SEQUENCE SIMILARITY 84, MEMBER A	-0.314	-0.758	-0.719	-0.28	0.246	0.409	0.14	0.226	0.098	0.305	0.444	0.524
660640	SFRS16	NM_007056	2878436	SPLICING FACTOR, ARGININE/SERINE-RICH 16 (SUPPRESSOR-OF-WHITE-APRICOT HOMOLOG, DROSOPHILA)	-0.097	-0.348	-1.014	0.17	-0.477	-0.672	0.079	-1.296	0.86	0.531	0.501	0.604
661230	A_32_P119295				-0.359	-0.18	-0.334	-0.563	-0.12	-0.167	-0.099	0.166	0.263	-0.109	0.329	0.572
661360	WWOX	NM_016373	2872227	PUTATIVE OXIDOREDUCTASE	-0.665	-0.591	-0.444	-0.457	-0.595	-0.641	-0.282	-0.15	1.541	1.296	0.614	0.016
661679	GPR77	NM_018485	2874914	G PROTEIN-COUPLED RECEPTOR 77	-0.371	-0.036	-0.079	-0.001	0.26	0.116	-0.083	-0.329	0.52	0.328	0.398	0.33
662320	AL565181	AL565181			-0.383	-0.2	-0.22	-0.33	-0.114	-0.134	-0.141	-0.349	0.585	0.081	0.247	1.18
662529	THC2655354				-0.068	-0.381	0.023	-0.238	-0.881	-0.852	-0.381	-0.236	0.543	0.239	0.42	1.07
663116	PAX3	NM_013942	3025006	PAIRED BOX GENE 3 (WAARDENBURG SYNDROME 1)	-0.559	-0.922	-0.436	0.046	0.337	0.999	0.127	-0.545	0.726	1.795	2.07	1
663268	CHRDL2	NM_015424	2859455	CHORDIN-LIKE 2	-0.184	-0.124	-0.205	-0.403	-0.013	-0.106	0.042	-0.179	0.389	0.219	0.087	0.365
663403	A_24_P298928				-0.094	-0.47	-0.126	-0.125	0.291	-0.101	-0.304	-0.166	0.348	0.222	0.449	0.264
663440	THC2640944				-0.521	-0.771	-0.521	-0.668	0.661	-0.192	0.167	-0.144	0.291	0.153	0.598	0.863
663810	KANK3	NM_198471	2863152	ANKYRIN REPEAT DOMAIN 47	-0.419	0.029	-0.383	-0.644	0.578	-0.45	0.08	0.267	1.173	0.769	0.77	1.159
663896	BNC1	NM_001717	2872018	BASONUCLIN 1	-0.424	-0.683	-0.432	-0.552	0.224	-0.197	-0.033	0.31	0.008	0.177	0.212	0.14
664117	KRT74	NM_175053	2875046	KERATIN 6 IRS4	-0.381	-0.416	-0.187	-0.58	0.209	-0.065	0.277	0.391	0.266	0.108	0.19	0.102
664169	THC2460394				-0.239	-0.137	-0.359	-0.419	0.178	-0.08	-0.243	0.258	0.452	0.547	0.299	0.204
664335	STC1	NM_003155	2878254	STANNIOCALCIN 1	-0.303	-0.366	-0.595	-0.333	0.306	0.022	0.101	0.053	-0.12	-0.125	0.014	0.314
664435	MFSD5	NM_032889	2864896	MAJOR FACILITATOR SUPERFAMILY DOMAIN CONTAINING 5	-0.309	-0.422	-0.147	-0.903	0.863	0.044	0.181	-0.747	0.976	1.883	1.106	2.22
664856	GZMB	NM_004131	2859457	GRANZYME B (GRANZYME 2, CYTOTOXIC T-LYMPHOCYTE-ASSOCIATED SERINE ESTERASE 1)	-1.576	-0.291	-0.498	-0.484	0.996	0.707	0.335	-0.647	1.56	1.14	1.379	1.097
665126	KIR3DL2	NM_006737	2860451	KILLER CELL IMMUNOGLOBULIN-LIKE RECEPTOR, THREE DOMAINS, LONG CYTOPLASMIC TAIL, 2	-1.252	-0.521	-0.552	-1.221	0.248	0.773	0.435	0.702	1.571	1.765	1.175	0.817
665138	KIAA1618	NM_020954	2858028	KIAA1618	-1.329	-0.349	-0.874	-0.033	0.178	-0.684	-0.489	-0.189	0.882	0.306	0.268	0.784
665329	FAM119A	NM_001018022	2878639	SIMILAR TO FKSG62	0.05	-0.087	-0.074	-0.217	0.101	0.042	-0.075	-0.017	0.095	0.178	0.15	0.167
665569	LOC440181				-0.985	-0.217	-0.224	-1.34	0.754	0.272	0.532	-0.064	0.701	1.039	0.942	0.881
665605	LOC129293	BC051789	2877541	HYPOTHETICAL PROTEIN LOC129293	-0.261	-0.731	-0.255	-0.497	-0.057	-0.67	-0.491	-0.409	-0.126	0.131	0.385	0.336
665938	WDR1	NM_017491	2863194	WD REPEAT DOMAIN 1	-0.704	-0.579	-0.011	-0.649	0.698	-0.257	-0.25	-0.081	0.271	0.524	0.841	0.933
666294	CPA5	NM_080385	2876856	CARBOXYPEPTIDASE A5	-0.138	-0.133	-0.076	-0.294	-0.018	0.107	-0.12	-0.072	0.278	0.095	0.095	0.276
666409	IFI27L2	NM_032036	3025799	FAMILY WITH SEQUENCE SIMILARITY 14, MEMBER A	-0.72	-0.44	-0.261	-0.283	-0.416	-0.514	-0.51	0.313	1.34	0.967	0.1	0.374
666419	GK5	NM_001039547	2876069	HYPOTHETICAL PROTEIN MGC40579	-1.883	-1.038	-0.736	-0.112	0.698	0.582	0.092	0.098	0.868	0.826	0.195	1.361
666538	SCAMP3	NM_052837	2865182	SECRETORY CARRIER MEMBRANE PROTEIN 3	0.265	-0.139	0.351	-0.365	-0.265	0.005	-0.421	-0.349	1.062	1.324	0.167	0.794
666810	COCH	NM_004086	2879275	COAGULATION FACTOR C HOMOLOG, COCHLIN (LIMULUS POLYPHEMUS)	-0.332	-0.355	-0.031	-0.515	0.116	-0.135	0.37	0.117	0.229	0.28	0.07	0.657
666927	TNXB	NM_019105	2876292	TENASCIN XB	-0.274	-0.182	-0.066	-0.437	0.029	-0.089	0.254	0.122	0.365	0.127	0.074	0.499
666972	A_32_P20040				-0.96	-0.406	-0.626	-0.895	1.072	-0.691	0.393	-0.597	1.771	0.398	1.13	1.145
667048	BRAF	NM_004333	2958589	V-RAF MURINE SARCOMA VIRAL ONCOGENE HOMOLOG B1	0.045	-0.423	-0.621	-0.339	-0.258	-0.325	-0.192	-0.108	0.472	0.092	0.598	0.514
667341	LOC728564	AL137495			-0.286	-0.254	-0.264	-0.341	0.041	-0.115	-0.118	-0.065	-0.039	0.274	0.168	0.212
667911	AMIGO1	NM_020703	2864817	ADHESION MOLECULE WITH IG-LIKE DOMAIN 1	-0.758	-0.239	-0.659	-0.42	0.126	0.75	-0.309	-0.147	1.993	1.01	0.807	0.537
668137	CTAGE1	NM_172241	3027971	CUTANEOUS T-CELL LYMPHOMA-ASSOCIATED ANTIGEN 1	-0.675	-0.923	-0.27	-0.705	0.382	-0.002	-0.04	0.672	0.09	-0.081	-0.448	0.14
668199	FAM135B	NM_015912	2871121	C8ORFK32 PROTEIN	-0.607	-0.395	-0.153	-0.544	-0.417	-0.121	-0.104	0.051	0.611	0.23	0.357	0.271
668890	VSTM2B	XM_292785	2910436	HYPOTHETICAL LOC342865	-0.284	-0.593	-0.474	0.188	-0.383	0.997	0.012	0.51	1.45	1.502	1.521	0.855
668906	ZNF501	NM_145044	2877632	ZINC FINGER PROTEIN 501	-0.462	-0.506	-0.254	-0.403	0.325	0.145	0.176	0.014	-0.011	-0.159	0.077	0.107
669137	TRIM37	NM_015294	2870785	TRIPARTITE MOTIF-CONTAINING 37	-0.167	0.217	0.485	-0.655	-0.494	0.008	0.138	-0.338	0.438	1.651	0.781	1.079
669755	THC2694860				-0.572	-0.289	-0.33	-0.36	0.364	0.149	0.248	0.268	0.096	-0.188	-0.094	0.298
670719	ENST00000360102	AY944711			-0.675	-0.737	-0.032	-0.866	0.757	-0.104	0.52	0.194	0.265	0.052	0.659	1.063
670988	TREM2	NM_018965	2862758	TRIGGERING RECEPTOR EXPRESSED ON MYELOID CELLS 2	-0.375	-0.183	-0.319	-0.486	-0.031	-0.169	-0.363	0.053	0.415	-0.037	0.323	0.648
671198	LOC439938	AK095259	3025195	HYPOTHETICAL PROTEIN FLJ37940	-0.271	-0.616	-0.254	-0.481	-0.028	-0.242	0.124	-0.026	0.163	0.409	0.464	-0.159
671321	CB959193	CB959193	3029136	SECRETOGLOBIN, FAMILY 2A, MEMBER 1	-1.254	-0.194	-0.539	-0.918	0.156	0.177	-0.518	-0.087	0.591	2.087	1.189	1.23
671631	THC2697041				-0.544	-0.163	-0.086	-0.771	-0.431	0.34	0.148	-0.134	0.52	0.222	0.36	0.726
672329	SUSD1	NM_022486	2860286	SUSHI DOMAIN CONTAINING 1	-0.739	0.105	0.136	-0.881	-0.808	-0.326	-0.354	-0.372	1.756	0.871	1.073	0.697
672896	KMO	NM_003679	3028872	KYNURENINE 3-MONOOXYGENASE (KYNURENINE 3-HYDROXYLASE)	-0.454	-0.913	-0.437	-0.821	0.066	-0.143	-0.173	0.232	-0.065	-0.124	-0.403	-0.014
672974	VTI1B	NM_006370	2889750	VESICLE TRANSPORT THROUGH INTERACTION WITH T-SNARES HOMOLOG 1B (YEAST)	-0.886	-0.474	-0.736	-0.731	-0.247	0.445	-0.044	0.067	0.69	0.783	-0.256	1.346
673131	DSP	NM_004415	2874098	DESMOPLAKIN	-1.123	-0.858	-0.814	-0.447	-0.375	-0.361	-0.364	-0.346	0.158	0.174	0.337	0.783
673147	KRT16	NM_005557	3027599	KERATIN 16 (FOCAL NON-EPIDERMOLYTIC PALMOPLANTAR KERATODERMA)	-0.255	-0.375	-0.16	-0.332	0.257	-0.04	-0.022	0.186	0.398	0.665	-0.037	0.326
673286	TBL1X	NM_005647	2873826	TRANSDUCIN (BETA)-LIKE 1X-LINKED	-0.465	-0.283	-0.226	-0.372	-0.434	0.038	0.572	-1.023	1.642	0.863	0.864	1.077
673537	SLC14A1	AK123681	2878839	SOLUTE CARRIER FAMILY 14 (UREA TRANSPORTER), MEMBER 1 (KIDD BLOOD GROUP)	-0.081	-0.611	-0.692	-0.288	0.109	-0.755	-0.356	-0.131	0.481	0.224	0.326	0.578
674021	BX393727	BX393727			-0.576	-1.172	-0.633	-0.321	0.343	0.276	0.07	-0.028	0.31	0.592	0.008	0.247
674363	KIR2DS2	NM_012312	2859539	KILLER CELL IMMUNOGLOBULIN-LIKE RECEPTOR, TWO DOMAINS, SHORT CYTOPLASMIC TAIL, 2	-1.525	-0.463	-0.788	-0.164	0.407	0.811	0.796	0.532	1.64	1.805	1.421	0.397
674508	DUSP14	NM_007026	2868796	DUAL SPECIFICITY PHOSPHATASE 14	-0.538	-0.461	-0.437	-0.792	-0.717	-0.428	-0.351	-0.013	0.962	1.04	-0.208	0.303
675349	ESPL1	NM_012291	2858060	EXTRA SPINDLE POLES LIKE 1 (S. CEREVISIAE)	-0.271	-0.72	-0.184	-0.854	0.391	-0.418	0.052	0.432	0.125	0.46	0.951	0.63
676090	AK027211	AK027211	2861988	HYPOTHETICAL PROTEIN FLJ23558	-0.315	-0.322	-0.127	-0.275	0.144	0.044	0.068	-0.2	0.342	-0.08	0.232	0.302
676523	CARD11	NM_032415	2860345	CASPASE RECRUITMENT DOMAIN FAMILY, MEMBER 11	-0.388	-0.347	-0.084	-0.227	0.385	0.197	0.209	0.437	0.572	0.089	0.801	0.358
676761	KCNH2	NM_172056	3027542	POTASSIUM VOLTAGE-GATED CHANNEL, SUBFAMILY H (EAG-RELATED), MEMBER 2	-0.353	-0.16	-0.578	-0.504	-0.091	-0.063	0.209	0.376	0.277	0.061	0.008	0.561
676907	AL561405	AL561405	3028565	URIDINE MONOPHOSPHATE SYNTHETASE (OROTATE PHOSPHORIBOSYL TRANSFERASE AND OROTIDINE-5'-DECARBOXYLASE)	-0.059	-0.221	-0.001	-0.082	-0.347	-0.119	0.11	-0.074	0.343	0.405	0.245	0.238
677169	S100A12	NM_005621	2879377	S100 CALCIUM BINDING PROTEIN A12 (CALGRANULIN C)	-0.677	-0.192	-0.404	-0.741	-0.156	-0.016	-0.25	0.396	0.912	0.291	0.128	1.109
677398	A_24_P877411				-0.54	-0.365	-0.514	-0.453	-0.308	-0.606	-0.266	-0.152	1.392	0.657	0.37	0.004
677468	DUSP8	NM_004420	2873640	DUAL SPECIFICITY PHOSPHATASE 8	-0.016	0.16	0.226	0.539	-0.786	-1.107	-0.049	0.05	0.669	0.555	0.965	0.969
677732	C10orf53	BC028127	2863392	CHROMOSOME 10 OPEN READING FRAME 53	-0.466	-0.386	-0.3	-0.05	0.151	0.001	-0.013	0.103	0.064	0.083	0.103	0.487
677887	PRR7	NM_030567	3028013	PROLINE RICH 7 (SYNAPTIC)	-0.714	-0.711	-0.073	0.468	-0.134	1.02	0.204	-0.47	1.472	1.487	1.532	1.014
677976	KLKB1	NM_000892	3024539	KALLIKREIN B, PLASMA (FLETCHER FACTOR) 1	-0.492	-0.387	-0.543	-0.448	0.165	-0.118	0.036	-0.088	0.468	0.361	0.467	0.656
678017	SLAMF7	NM_021181	3029383	SLAM FAMILY MEMBER 7	-1.533	-0.706	-0.805	0.1	0.534	0.391	0.255	0.669	0.348	1.016	1.407	1.649
678324	THC2618235				0.175	-0.233	-0.184	0.015	-0.83	-0.649	-0.301	-0.515	0.295	-0.229	0.33	0.454
679696	TLE1	NM_005077	2868641	TRANSDUCIN-LIKE ENHANCER OF SPLIT 1 (E(SP1) HOMOLOG, DROSOPHILA)	-0.301	-0.183	-0.164	-0.262	0.136	-0.14	0.555	0.249	0.892	0.339	0.42	0.331
679872	GBP1	NM_002053	2874346	GUANYLATE BINDING PROTEIN 1, INTERFERON-INDUCIBLE, 67KDA	-0.814	-0.611	-0.698	-0.526	-0.41	0.129	0.046	-0.159	-0.052	0.318	-0.254	0.704
680128	PTGDS	NM_000954	2860004	PROSTAGLANDIN D2 SYNTHASE 21KDA (BRAIN)	-0.589	-0.28	-0.183	-0.209	0.16	-0.126	0.528	-0.048	0.768	0.57	0.421	0.182
680300	DTX1	NM_004416	2858468	DELTEX HOMOLOG 1 (DROSOPHILA)	-0.29	-0.293	-0.544	0.031	-0.064	-0.253	-0.046	-0.069	0.393	0.028	0.309	0.169
680342	ACE2	NM_021804	2871329	DKFZP434A014 PROTEIN	-0.126	-0.388	-0.372	-0.741	-0.049	-0.221	-0.374	0.184	0.513	0.263	0.001	0.322
680783	BRUNOL5	NM_021938	2860387	BRUNO-LIKE 5, RNA BINDING PROTEIN (DROSOPHILA)	-0.317	-0.419	-0.183	-0.206	0.174	-0.011	0.113	0.143	0.29	0.172	0.455	0.162
681145	PAX8	NM_013992	2860369	PAIRED BOX GENE 8	-0.372	-0.697	-0.196	-0.543	0.294	0.119	0.29	-0.165	0.105	0.125	0.065	0.296
681542	KIR2DS1	NM_014512	2865554	KILLER CELL IMMUNOGLOBULIN-LIKE RECEPTOR, TWO DOMAINS, SHORT CYTOPLASMIC TAIL, 1	-1.402	-0.239	-0.165	-1.3	0.562	0.871	-0.084	0.441	1.538	1.7	1.233	0.073
ONTOGENY CLUSTER 4
Category	Term	Count	%	PValue	Genes	List Total	Pop Hits	Pop Total	Fold Enrichment	Bonferroni	Benjamini	FDR
PANTHER_BP_ALL	BP00110:Other receptor mediated signaling pathway	5	4.10%	0.006838918175525325	2859457, 2873640, 2859476, 2870785, 2872764,	118	188	29414	6.629552830869095	0.7790304487958783	0.31438058310784356	8.364765451601697
PANTHER_BP_ALL	BP00286:Cell structure	25	20.49%	0.007008282533646788	2857949, 2878658, 3027599, 2870613, 2889750, 3026471, 3028872, 2878254, 2873640, 3027542, 2873826, 2868641, 3025969, 2881538, 2876227, 2860451, 2876292, 3029619, 2863133, 2872641, 3024539, 3024302, 2857961, 2860345, 2865182,	118	3585	29414	1.738292792473347	0.7871676039882665	0.26614958046952064	8.563483935403394
PANTHER_BP_ALL	BP00285:Cell structure and motility	18	14.75%	2.1145201855563204E-4	2868641, 2865765, 2881538, 2857949, 2876227, 2868796, 2860451, 2863028, 3027599, 2876292, 3029619, 3028013, 3030017, 3024302, 3024539, 2865182, 2873640, 2860100,	118	1608	29414	2.790349101947888	0.04545869528985369	0.022993702829840368	0.2688320695469315
PANTHER_BP_ALL	BP00104:G-protein mediated signaling	27	22.13%	0.008615337007210545	2863028, 2859457, 2870613, 2889750, 3028013, 2860107, 2879277, 2876070, 2875527, 3029029, 2872764, 3027542, 2875046, 2868641, 2869760, 2858060, 2878839, 2866651, 2863912, 2874914, 2860286, 2872641, 2872227, 2858982, 2878761, 2857961, 2872318,	118	4056	29414	1.6593496138802528	0.8509667709723228	0.27186173962153515	10.429410805110761
PANTHER_BP_ALL	BP00103:Cell surface receptor mediated signal transduction	18	14.75%	0.04114446074298793	3028991, 2863028, 2859457, 2866651, 2870613, 2874914, 3028013, 2872641, 2860286, 2858982, 3025006, 2878761, 2857961, 2876070, 3027542, 2872764, 2875305, 2858445,	118	2721	29414	1.6489824902360177	0.9999032390937109	0.6419310534080167	41.42273989854518
PANTHER_BP_ALL	BP00248:Mesoderm development	10	8.20%	0.010237785950151488	2871948, 2879277, 2958589, 2879377, 2876292, 2873640, 2875527, 3027542, 3028013, 2877234,	118	905	29414	2.754377750725723	0.8960579302805776	0.27632824413581414	12.277564628731529
PANTHER_BP_ALL	BP00102:Signal transduction	34	27.87%	1.383904841463926E-4	2958589, 2863152, 2878658, 3029522, 2860107, 2879277, 2870723, 2876069, 2870427, 2875527, 2859476, 2876012, 3027542, 3029029, 2860100, 2864840, 2859539, 3025195, 2864817, 3025969, 3025799, 2860451, 2876292, 2874914, 2861003, 2865554, 2872227, 2874346, 2878761, 2857961, 2860345, 2876856, 2862023, 2858445,	118	4356	29414	1.945642869371683	0.029989141694977017	0.029989141694977017	0.17601979663437461
PANTHER_BP_ALL	BP00122:Ligand-mediated signaling	10	8.20%	0.011015918745345105	2859539, 2874346, 2878761, 3025006, 2860451, 2862758, 2874098, 2859168, 2865554, 2861988,	118	916	29414	2.721301162016135	0.9125728604523198	0.2625954998115151	13.151420628025978
PANTHER_BP_ALL	BP00211:Miscellaneous	12	9.84%	0.0030447876571289226	2864817, 2857949, 2859998, 2871329, 2862758, 2878839, 3029619, 2874388, 2875527, 2859476, 2867247, 2873826,	118	1045	29414	2.8624442462087427	0.48873904287400083	0.2003851035146922	3.807368590049398
PANTHER_BP_ALL:BP00102:Signal transduction	34 Gene(s)
DAVIDID	DAVID Gene Name	Micro array SeqName	Bright mean	D2A+ mean	D2A- mean
2857961	COMPLEMENT COMPONENT 5A RECEPTOR 1	C5AR1	-0.18975	-0.12775	0.2225
2858445	GLUTAMATE RECEPTOR, IONOTROPIC, KAINATE 2	GRIK2	-0.44325	-0.115	0.4035
2859476	DYSTROPHIN RELATED PROTEIN 2	DRP2	-0.443	0.01825	0.1145
2859539	KILLER CELL IMMUNOGLOBULIN-LIKE RECEPTOR, TWO DOMAINS, SHORT CYTOPLASMIC TAIL, 2	KIR2DS2	-0.735	0.6365	1.31575
2860100	DELETED IN COLORECTAL CARCINOMA	DCC	-0.28925	0.00125	0.01325
2860107	CLUSTERIN	THC2537367	-0.157	0.12075	0.56875
2860345	CASPASE RECRUITMENT DOMAIN FAMILY, MEMBER 11	CARD11	-0.2615	0.307	0.455
2860451	KILLER CELL IMMUNOGLOBULIN-LIKE RECEPTOR, THREE DOMAINS, LONG CYTOPLASMIC TAIL, 2	KIR3DL2	-0.8865	0.5395	1.332
2861003	CARBONIC ANHYDRASE VA, MITOCHONDRIAL	CA5A	-0.2475	-0.18075	0.48175
2862023	DOPAMINE RECEPTOR D5	DRD5	-0.7615	-0.11475	0.57525
2863152	ANKYRIN REPEAT DOMAIN 47	KANK3	-0.35425	0.11875	0.96775
2864817	ADHESION MOLECULE WITH IG-LIKE DOMAIN 1	AMIGO1	-0.519	0.105	1.08675
2864840	PROTOCADHERIN GAMMA SUBFAMILY A, 2	PCDHGA2	-0.30325	0.13425	0.33575
2865554	KILLER CELL IMMUNOGLOBULIN-LIKE RECEPTOR, TWO DOMAINS, SHORT CYTOPLASMIC TAIL, 1	KIR2DS1	-0.7765	0.4475	1.136
2870427	XENOTROPIC AND POLYTROPIC RETROVIRUS RECEPTOR	XPR1	0.17425	-0.581	1.03125
2870723	MYOSIN, HEAVY POLYPEPTIDE 1, SKELETAL MUSCLE, ADULT	MYH1	-0.5845	0.01125	0.18675
2872227	PUTATIVE OXIDOREDUCTASE	WWOX	-0.53925	-0.417	0.86675
2874346	GUANYLATE BINDING PROTEIN 1, INTERFERON-INDUCIBLE, 67KDA	GBP1	-0.66225	-0.0985	0.179
2874914	G PROTEIN-COUPLED RECEPTOR 77	GPR77	-0.12175	-0.009	0.394
2875527	HYPOTHETICAL PROTEIN DKFZP762B226	GNPTAB	-0.51625	0.13775	0.53625
2876012	OLFACTOMEDIN 2	OLFM2	-0.3085	-0.15725	0.775
2876069	HYPOTHETICAL PROTEIN MGC40579	GK5	-0.94225	0.3675	0.8125
2876292	TENASCIN XB	TNXB	-0.23975	0.079	0.26625
2876856	CARBOXYPEPTIDASE A5	CPA5	-0.16025	-0.02575	0.186
2878658	FAT TUMOR SUPPRESSOR HOMOLOG 2 (DROSOPHILA)	FAT2	-0.344	0.04475	0.17125
2878761	KILLER CELL IMMUNOGLOBULIN-LIKE RECEPTOR, TWO DOMAINS, LONG CYTOPLASMIC TAIL, 2	KIR2DL2	-0.777	0.49575	1.26925
2879277	CORIN, SERINE PEPTIDASE	CORIN	-0.1575	-0.08575	0.37125
2958589	V-RAF MURINE SARCOMA VIRAL ONCOGENE HOMOLOG B1	BRAF	-0.3345	-0.22075	0.419
3025195	HYPOTHETICAL PROTEIN FLJ37940	LOC439938	-0.4055	-0.043	0.21925
3025799	FAMILY WITH SEQUENCE SIMILARITY 14, MEMBER A	IFI27L2	-0.426	-0.28175	0.69525
3025969	BRADYKININ RECEPTOR B2	BDKRB2	-0.4405	-0.4065	0.30225
3027542	POTASSIUM VOLTAGE-GATED CHANNEL, SUBFAMILY H (EAG-RELATED), MEMBER 2	KCNH2	-0.39875	0.10775	0.22675
3029029	RAS ASSOCIATION (RALGDS/AF-6) DOMAIN FAMILY 4	RASSF4	-0.496	0.09275	1.27075
3029522	SOMATOSTATIN RECEPTOR 2	SSTR2	-0.16	0.29525	0.345
PANTHER_BP_ALL:BP00285:Cell structure and motility	18 Gene(s)
DAVIDID	DAVID Gene Name	Micro array SeqName	Bright mean	D2A+ mean	D2A- mean
2857949	KERATIN ASSOCIATED PROTEIN 15-1	KRTAP15-1	-0.3685	0.01375	0.10125
2860100	DELETED IN COLORECTAL CARCINOMA	DCC	-0.28925	0.00125	0.01325
2860451	KILLER CELL IMMUNOGLOBULIN-LIKE RECEPTOR, THREE DOMAINS, LONG CYTOPLASMIC TAIL, 2	KIR3DL2	-0.8865	0.5395	1.332
2863028	STOMATIN	STOM	-0.6235	-0.11375	0.9085
2865182	SECRETORY CARRIER MEMBRANE PROTEIN 3	SCAMP3	0.028	-0.2575	0.83675
2865765	NIMA (NEVER IN MITOSIS GENE A)-RELATED KINASE 3	NEK3	-0.483	0.18475	0.27075
2868641	TRANSDUCIN-LIKE ENHANCER OF SPLIT 1 (E(SP1) HOMOLOG, DROSOPHILA)	TLE1	-0.2275	0.2	0.4955
2868796	DUAL SPECIFICITY PHOSPHATASE 14	DUSP14	-0.557	-0.37725	0.52425
2873640	DUAL SPECIFICITY PHOSPHATASE 8	DUSP8	0.22725	-0.473	0.7895
2876227	E2F TRANSCRIPTION FACTOR 6	E2F6	-0.59375	-0.8465	1.29875
2876292	TENASCIN XB	TNXB	-0.23975	0.079	0.26625
2881538	SWI/SNF RELATED, MATRIX ASSOCIATED, ACTIN DEPENDENT REGULATOR OF CHROMATIN, SUBFAMILY A, MEMBER 2	AY295762	-0.37725	-0.14425	1.472
3024302	KERATIN 13	KRT13	-0.56125	0.38225	0.475
3024539	KALLIKREIN B, PLASMA (FLETCHER FACTOR) 1	KLKB1	-0.4675	-0.00125	0.488
3027599	KERATIN 16 (FOCAL NON-EPIDERMOLYTIC PALMOPLANTAR KERATODERMA)	KRT16	-0.2805	0.09525	0.338
3028013	PROLINE RICH 7 (SYNAPTIC)	PRR7	-0.2575	0.155	1.37625
3029619	CHLORIDE CHANNEL, CALCIUM ACTIVATED, FAMILY MEMBER 2	CLCA2	-0.27475	-0.09125	0.19025
3030017	HYPOTHETICAL PROTEIN FLJ23356	SGK196	-0.262	-0.63325	0.837
PANTHER_BP_ALL:BP00286:Cell structure	25 Gene(s)
DAVIDID	DAVID Gene Name	Micro array SeqName	Bright mean	D2A+ mean	D2A- mean
2857949	KERATIN ASSOCIATED PROTEIN 15-1	KRTAP15-1	-0.3685	0.01375	0.10125
2857961	COMPLEMENT COMPONENT 5A RECEPTOR 1	C5AR1	-0.18975	-0.12775	0.2225
2860345	CASPASE RECRUITMENT DOMAIN FAMILY, MEMBER 11	CARD11	-0.2615	0.307	0.455
2860451	KILLER CELL IMMUNOGLOBULIN-LIKE RECEPTOR, THREE DOMAINS, LONG CYTOPLASMIC TAIL, 2	KIR3DL2	-0.8865	0.5395	1.332
2863133	HEMOCHROMATOSIS	HFE	-0.36575	0.04	0.25025
2865182	SECRETORY CARRIER MEMBRANE PROTEIN 3	SCAMP3	0.028	-0.2575	0.83675
2868641	TRANSDUCIN-LIKE ENHANCER OF SPLIT 1 (E(SP1) HOMOLOG, DROSOPHILA)	TLE1	-0.2275	0.2	0.4955
2870613	ACTIN-BINDING RHO ACTIVATING PROTEIN	ABRA	-0.419	0.1905	0.482
2872641	PLATELET-ACTIVATING FACTOR ACETYLHYDROLASE 2, 40KDA	PAFAH2	-0.58425	0.403	1.01275
2873640	DUAL SPECIFICITY PHOSPHATASE 8	DUSP8	0.22725	-0.473	0.7895
2873826	TRANSDUCIN (BETA)-LIKE 1X-LINKED	TBL1X	-0.3365	-0.21175	1.1115
2876227	E2F TRANSCRIPTION FACTOR 6	E2F6	-0.59375	-0.8465	1.29875
2876292	TENASCIN XB	TNXB	-0.23975	0.079	0.26625
2878254	STANNIOCALCIN 1	STC1	-0.39925	0.1205	0.02075
2878658	FAT TUMOR SUPPRESSOR HOMOLOG 2 (DROSOPHILA)	FAT2	-0.344	0.04475	0.17125
2881538	SWI/SNF RELATED, MATRIX ASSOCIATED, ACTIN DEPENDENT REGULATOR OF CHROMATIN, SUBFAMILY A, MEMBER 2	AY295762	-0.37725	-0.14425	1.472
2889750	VESICLE TRANSPORT THROUGH INTERACTION WITH T-SNARES HOMOLOG 1B (YEAST)	VTI1B	-0.70675	0.05525	0.64075
3024302	KERATIN 13	KRT13	-0.56125	0.38225	0.475
3024539	KALLIKREIN B, PLASMA (FLETCHER FACTOR) 1	KLKB1	-0.4675	-0.00125	0.488
3025969	BRADYKININ RECEPTOR B2	BDKRB2	-0.4405	-0.4065	0.30225
3026471	TESTIS SPECIFIC, 10 INTERACTING PROTEIN	TSGA10IP	-0.50075	-0.107	0.202
3027542	POTASSIUM VOLTAGE-GATED CHANNEL, SUBFAMILY H (EAG-RELATED), MEMBER 2	KCNH2	-0.39875	0.10775	0.22675
3027599	KERATIN 16 (FOCAL NON-EPIDERMOLYTIC PALMOPLANTAR KERATODERMA)	KRT16	-0.2805	0.09525	0.338
3028872	KYNURENINE 3-MONOOXYGENASE (KYNURENINE 3-HYDROXYLASE)	KMO	-0.65625	-0.0045	-0.1515
3029619	CHLORIDE CHANNEL, CALCIUM ACTIVATED, FAMILY MEMBER 2	CLCA2	-0.27475	-0.09125	0.19025
CLUSTER 5
micro array SeqID	Micro array SeqName	Accesion #	DAVIDID	DAVID Gene Name	Bright #1	Bright #2	Bright #3	Bright #4	D2A+ #1	D2A+ #2	D2A+ #3	D2A+ #4	D2A- #1	D2A- #2	D2A- #3	D2A- #4
640683	MYO1F	NM_012335	2860312	MYOSIN IF	-0.378	0.222	-0.186	-0.163	0.318	0.532	0.311	0.061	0.865	0.828	0.318	0.56
640874	AK128436	AK128436	2872641	PLATELET-ACTIVATING FACTOR ACETYLHYDROLASE 2, 40KDA	-0.652	-2.554	-1.721	-2.389	0.611	0.867	0.111	0.981	0.877	0.461	-0.072	2.359
641063	CCL5	NM_002985	2874180	CHEMOKINE (C-C MOTIF) LIGAND 5	-0.733	-0.975	-1.471	-0.961	0.898	0.757	0.21	0.703	0.76	0.652	0.451	0.384
641441	SLC13A3	NM_001011554	3029530	SOLUTE CARRIER FAMILY 13 (SODIUM-DEPENDENT DICARBOXYLATE TRANSPORTER), MEMBER 3	-0.451	-0.414	-0.234	-0.557	0.44	0.238	0.174	0.52	-0.07	0.036	-0.279	0.288
641459	WASH1	NM_198943	3026768	HYPOTHETICAL PROTEIN LOC58481	-0.878	-0.366	-0.3	-0.545	0.529	0.239	0.102	0.032	0.84	0.742	0.184	0.031
641461	KRT80	NM_182507	2872967	HYPOTHETICAL PROTEIN LOC144501	-0.395	-1.016	-0.453	-0.816	0.234	0.121	0.827	0.937	-0.014	0.929	0.228	-0.096
641833	BRD7P2				-0.179	-0.802	-1.278	-0.789	0.314	0.402	-0.452	0.122	1.269	0.475	0.715	1.267
641871	AKR1C1	BC040210	2876440	ALDO-KETO REDUCTASE FAMILY 1, MEMBER C1 (DIHYDRODIOL DEHYDROGENASE 1; 20-ALPHA (3-ALPHA)-HYDROXYSTEROID DEHYDROGENASE)	-0.403	-0.579	-0.634	-0.972	0.092	1.025	0.526	0.464	0.167	0.959	1.539	1.825
642496	TRMT5	NM_020810	2859045	TRM5 TRNA METHYLTRANSFERASE 5 HOMOLOG (S. CEREVISIAE)	-0.685	-0.68	-0.409	-0.364	0.134	0.454	0.424	0.47	0.129	0.573	-0.209	1.063
642888	RPS6KB1	BC036033	2863170	RIBOSOMAL PROTEIN S6 KINASE, 70KDA, POLYPEPTIDE 1	-0.43	-0.371	-0.946	-1.398	-0.51	0.361	0.085	-0.212	1.036	0.181	0.27	1.134
643030	THC2693741				-0.248	-0.92	-1.175	-1.028	0.046	0.261	1.334	0.271	0.779	0.057	1.09	0.276
643078	BE825944	BE825944	2871354	SIGNAL TRANSDUCER AND ACTIVATOR OF TRANSCRIPTION 2, 113KDA	-0.218	-0.79	-1.542	-1.308	0.244	0.495	0.027	0.453	1.352	0.514	-0.171	1.342
643569	RORA	BC035094	2895211	HYPOTHETICAL PROTEIN LOC283666	-0.043	-2.135	-0.921	-1.12	1.177	0.275	0.865	-0.05	1.065	0.717	0.992	0.013
644171	PSTPIP2	NM_024430	3025616	PROLINE-SERINE-THREONINE PHOSPHATASE INTERACTING PROTEIN 2	-1.007	0.151	-1.492	-0.173	-0.09	0.184	1.183	0.421	1.52	1.215	1.102	1.924
644377	CCDC88A	NM_018084	3028722	HYPOTHETICAL PROTEIN LOC55580	-1.227	-1.508	-0.434	-0.826	0.529	-0.072	0.055	0.63	0.564	-0.135	0.095	0.877
644429	RP13-401N8.2	AK125985	2864197	CDNA FLJ43997 FIS, CLONE TESTI4021456	-1.095	-1.049	-1.513	-0.69	0.526	1.022	0.561	0.613	-0.233	-0.499	0.33	1.031
644804	LOC642521	XM_926017	2991696	SIMILAR TO NUCLEAR DNA-BINDING PROTEIN	-0.771	-1.176	-0.558	-1.281	0.081	0.31	1.11	1.159	0.924	-0.212	-0.599	0.67
644910	THC2633747				0.047	-0.599	-0.153	-0.685	-0.443	0.244	0.118	0.829	0.991	0.502	1.215	0.865
645150	THC2698568				-2.538	-0.349	-0.708	-2.198	0.418	-0.11	0.007	0.753	0.583	0.07	1.342	0.617
645444	STAT4	NM_003151	2874941	SIGNAL TRANSDUCER AND ACTIVATOR OF TRANSCRIPTION 4	-0.053	-0.249	-0.548	-1.178	0.24	0.445	0.385	0.308	0.582	0.505	0.538	0.029
645917	SHC4	NM_203349	2883449	SHC (SRC HOMOLOGY 2 DOMAIN CONTAINING) FAMILY, MEMBER 4	-0.415	-0.727	-0.481	0.501	0.519	0.504	0.319	0.479	0.95	0.736	0.452	0.578
646119	SYNE2	NM_182910	2873322	SPECTRIN REPEAT CONTAINING, NUCLEAR ENVELOPE 2	-0.102	-0.212	-1.73	-1.095	0.601	0.788	1.081	0.23	0.534	1.694	0.534	1.706
646255	FGFBP2	NM_031950	3028991	KSP37 PROTEIN	-1.001	-0.989	-0.998	-1.064	0.519	0.117	0.661	0.67	1.168	0.758	0.758	1.002
646398	AF086054	AF086054			-2.221	-1.439	-0.326	-2.86	0.793	0.937	0.988	1.114	0.748	1.607	0.555	0.704
646460	CST7	NM_003650	3028124	CYSTATIN F (LEUKOCYSTATIN)	-0.953	-1.191	-1.827	-0.272	0.671	0.608	0.394	0.852	0.815	0.695	0.119	0.657
646611	C11orf68	NM_031450	3027634	BASOPHILIC LEUKEMIA EXPRESSED PROTEIN BLES03	-0.114	-0.473	-0.216	-0.564	0.224	0.187	0.221	0.205	1.147	0.364	0.161	0.43
646838	TXNDC1	NM_030755	2874899	THIOREDOXIN DOMAIN CONTAINING	-0.24	-0.422	-0.267	-0.272	-0.014	-0.175	-0.263	0.33	1.301	0.216	1.125	0.368
646907	GNPTAB	NM_024312	2875527	HYPOTHETICAL PROTEIN DKFZP762B226	-0.413	-0.723	-0.674	-0.49	0.322	0.509	0.68	0.977	0.741	0.719	0.783	0.045
647292	PRSS23	NM_007173	2869739	PROTEASE, SERINE, 23	-1.719	-1.063	-1.712	-1.333	-0.949	0.641	0.304	2.137	0.926	0.603	1.465	1.763
647357	A_24_P144556				-1.152	-0.506	-0.442	-1.377	-0.423	0.915	0.411	0.302	0.838	0.418	0.228	0.44
647407	FKBP11	NM_016594	3028133	FK506 BINDING PROTEIN 11, 19 KDA	-0.484	-0.278	-1.04	-0.496	0.619	0.377	1.137	1.171	0.652	0.671	1.487	0.374
647762	LYAR	NM_017816	2874440	HYPOTHETICAL PROTEIN FLJ20425	-0.888	-0.331	0.062	-0.368	0.993	1.04	-0.019	0.555	1.086	0.571	1.389	0.726
647940	GDF9	NM_005260	2862922	GROWTH DIFFERENTIATION FACTOR 9	-0.216	-1.188	-0.658	-0.618	0.862	0.384	0.943	1.115	0.458	0.299	0.52	1.102
648440	CDKN1B	NM_004064	2878296	CYCLIN-DEPENDENT KINASE INHIBITOR 1B (P27, KIP1)	-0.641	-0.154	-0.73	-0.079	0.534	0.442	-0.225	0.288	0.489	0.131	1.058	0.857
648535	PTCH1	AK124593	2868418	CDNA FLJ42602 FIS, CLONE BRACE3011271, MODERATELY SIMILAR TO PATCHED PROTEIN	-2.026	-1.466	-2.668	-2.311	1.32	0.611	0.614	0.707	1.441	0.22	0.322	0.981
648659	CD48	NM_001778	2874023	CD48 ANTIGEN (B-CELL MEMBRANE PROTEIN)	0.052	-1.277	-0.993	-1.07	0.097	0.541	0.343	1.104	0.504	1.211	0.337	-0.094
648821	CCL3	NM_002983	3027768	CHEMOKINE (C-C MOTIF) LIGAND 3	-1.012	-0.634	-0.869	-0.761	1.474	0.419	0.839	1.46	0.866	0.282	0.899	1.607
649872	KIR2DS4	NM_178228	2878896	KILLER CELL IMMUNOGLOBULIN-LIKE RECEPTOR, TWO DOMAINS, LONG CYTOPLASMIC TAIL, 3	-0.516	-0.408	-0.524	-0.534	-0.087	0.958	0.676	0.434	0.695	1.402	0.536	0.187
649896	A_24_P571824				-0.184	-0.292	-0.245	-0.5	-0.138	0.396	0.168	-0.408	0.465	0.949	0.538	0.316
650316	KIR3DL1	NM_013289	2888214	KILLER CELL IMMUNOGLOBULIN-LIKE RECEPTOR, THREE DOMAINS, LONG CYTOPLASMIC TAIL, 1	-0.857	-0.368	-0.742	-0.976	-0.244	0.89	0.429	0.825	0.858	1.906	0.189	0.33
650800	AF384996	AF384996	2873893	MUSP1	-0.06	-0.353	-0.618	-0.355	-0.689	0.562	-0.196	-0.109	0.687	1.044	1.665	0.56
650907	BF433725	BF433725	2870813	SERINE/THREONINE KINASE 4	-0.445	-0.712	-0.449	-0.878	0.913	0.547	0.609	0.21	0.771	0.41	0.747	0.111
651839	LOC100130703				-0.623	-0.114	-0.661	-1.209	0.847	0.642	0.482	0.33	1.357	0.65	0.725	0.522
652160	ATP5I	NM_007100	2862793	ATP SYNTHASE, H+ TRANSPORTING, MITOCHONDRIAL F0 COMPLEX, SUBUNIT E	-0.8	-0.537	-0.284	-0.613	0.337	0.173	-0.175	-0.212	0.701	0.427	0.318	0.439
652170	LAT2	NM_022040	2871453	LINKER FOR ACTIVATION OF T CELLS FAMILY, MEMBER 2	-1.554	-0.728	-1.285	-0.023	1.05	0.94	0.284	1.218	-0.1	0.41	0.007	1.405
652394	COPS4	NM_016129	3026877	COP9 CONSTITUTIVE PHOTOMORPHOGENIC HOMOLOG SUBUNIT 4 (ARABIDOPSIS)	-0.273	-1.598	-1.983	-0.918	0.882	-0.419	0.213	0.738	0.571	0.158	-0.094	0.373
652657	CCL3L3	NM_001001437	3025735	CHEMOKINE (C-C MOTIF) LIGAND 3-LIKE 1	-1.322	-0.96	-0.988	-0.482	1.477	0.4	0.975	1.343	0.812	0.353	0.881	1.61
653184	NP103207				-0.454	-0.473	-0.456	-0.284	0.437	0.043	0.666	1.27	0.155	0.401	0.281	0.963
653757	FEZ1	NM_005103	2868195	FASCICULATION AND ELONGATION PROTEIN ZETA 1 (ZYGIN I)	0.168	-0.527	-1.239	-1.519	1.64	0.75	0.634	1.302	-0.283	0.77	0.742	1.382
654465	RAB11FIP4	NM_032932	3027621	RAB11 FAMILY INTERACTING PROTEIN 4 (CLASS II)	-0.642	-0.478	-0.32	-0.707	0.249	0.32	0.131	0.375	0.224	0.724	0.15	-0.104
654640	KIR2DL5A	NM_020535	2876886	KILLER CELL IMMUNOGLOBULIN-LIKE RECEPTOR, TWO DOMAINS, LONG CYTOPLASMIC TAIL, 5A	-0.917	-0.378	-0.747	-1.063	-0.154	1.264	0.621	0.568	0.813	1.989	0.615	0.471
654770	C17orf66	NM_152781	3025842	CHROMOSOME 17 OPEN READING FRAME 66	-1.588	-0.665	-0.468	-1.225	0.791	-0.021	0.616	0.474	2.013	-0.245	0.418	0.952
654913	TSPYL2	NM_022117	2865178	TSPY-LIKE 2	-0.213	-0.699	-0.452	-0.601	0.314	0.494	0.529	0.388	0.77	0.57	0.626	0.742
655006	YPEL1	NM_013313	2860121	YIPPEE-LIKE 1 (DROSOPHILA)	-0.616	-0.34	-0.515	-1.005	0.225	0.594	0.835	0.347	1.226	0.606	0.943	0.064
656264	LOC284232				-1.426	-3.311	-1.508	-0.768	1.71	0.1	0.515	0.679	2.497	0.259	-0.178	1.466
656366	WNT11	NM_004626	3026437	WINGLESS-TYPE MMTV INTEGRATION SITE FAMILY, MEMBER 11	-0.213	-0.572	-0.8	-0.811	0.392	1.594	0.037	0.785	0.097	0.192	0.253	0.128
656609	TTLL3	NM_015644	2873307	TUBULIN TYROSINE LIGASE-LIKE FAMILY, MEMBER 3	-0.512	-0.497	-0.623	-0.46	-0.888	0.512	-0.451	0.46	0.741	0.506	1.128	0.821
656744	A_32_P21742				-0.583	-1.849	-0.247	-0.803	0.329	0.566	1.286	0.419	0.324	1.232	1.21	1.003
656778	PHOSPHO1	NM_178500	2946021	PHOSPHATASE, ORPHAN 1	-0.63	-0.443	-0.34	-0.39	0.626	0.236	-0.217	0.513	0.372	0.393	0.99	0.824
656803	GPR56	NM_201525	2872230	G PROTEIN-COUPLED RECEPTOR 56	-0.981	-1.042	-0.445	-0.534	0.989	0.773	1.098	0.975	-0.299	1.349	0.752	1.03
656807	GPR56	NM_201525			-1.642	-0.803	0.167	-0.7	0.561	0.128	1.383	1.124	0.421	0.367	1.097	1.544
657729	C18orf33	AK096231	3024895	CDNA FLJ38912 FIS, CLONE NT2NE2007425	-2.031	-2.124	-0.078	-1.715	0.669	-0.579	0.363	0.869	-0.012	0.051	0.995	1.228
658125	THC2368205				-0.672	-0.715	-0.31	-1.702	1.017	0.882	1.046	0.897	0.811	1.57	0.788	-0.21
658624	SPIC	NM_152323	3024217	SPI-C TRANSCRIPTION FACTOR (SPI-1/PU.1 RELATED)	-0.506	-1.52	-1.044	-1.702	0.598	0.576	0.514	0.533	0.375	1.664	0.053	0.904
658968	KCNF1	NM_002236	2862629	POTASSIUM VOLTAGE-GATED CHANNEL, SUBFAMILY F, MEMBER 1	-0.185	-0.61	-0.443	-0.009	0.474	0.208	-0.04	-0.367	0.645	0.977	1.285	0.515
659090	CCL3L3	NM_001001437			-1.041	-0.926	-0.797	-0.571	1.365	0.495	1.055	1.415	0.809	0.548	0.997	1.85
659426	PPP2R5C	NM_178588	2865253	PROTEIN PHOSPHATASE 2, REGULATORY SUBUNIT B (B56), GAMMA ISOFORM	-0.341	-0.665	-0.384	-0.644	0.292	0.669	0.24	0.395	0.389	0.738	0.486	0.882
659650	CYCS	NM_018947	2859706	CYTOCHROME C, SOMATIC	-0.371	-0.566	-0.595	-1.193	0.646	0.127	0.406	1.202	0.845	0.086	0.154	0.605
660138	THC2635386				-0.782	-3.015	-1.224	-0.769	1.264	0.473	0.605	0.345	0.975	0.229	0.776	0.336
660171	RAB8B	NM_016530	2865697	RAB8B, MEMBER RAS ONCOGENE FAMILY	0.025	-0.266	-0.784	-0.831	0.618	-0.156	0.264	0.771	0.55	0.555	0.34	0.746
660501	PAFAH2	AK129536			-0.792	-1.185	-0.351	-1.203	0.943	1.07	1.075	1.078	0.509	1.439	0.507	0.079
662202	C1orf38	BC031655	2863652	CHROMOSOME 1 OPEN READING FRAME 38	-0.437	-0.611	-1.152	0.085	-0.104	0.077	0.808	0.373	0.47	0.523	0.78	1.321
662254	FANCE	NM_021922	3029414	FANCONI ANEMIA, COMPLEMENTATION GROUP E	-0.634	-0.4	-0.26	-0.642	0.408	0.73	-0.095	0.402	-0.01	0.467	-0.115	-0.114
662666	BRD7P3	NR_002730	2874501	BROMODOMAIN CONTAINING PROTEIN 75 KDA PSEUDOGENE	-0.155	-0.637	-0.921	-0.559	0.174	0.522	-0.461	0.447	1.448	0.431	0.497	0.951
663023	LOC646262	XM_929207	2979791	HYPOTHETICAL PROTEIN LOC646262	-1.218	-0.398	-0.518	-0.32	0.532	-0.103	0.03	0.798	0.01	0.336	0.22	0.232
663996	SEPT7A	NM_001011553	2864995	SEPTIN 7	-0.23	-0.11	-0.809	-1.221	-0.522	-0.077	0.397	0.026	0.683	0.734	0.647	0.313
665801	EEPD1	AF161370	2877732	HSPC107	-1.259	-1.18	-0.951	-1.132	-0.226	1.057	0.174	-0.584	1.499	1.125	0.399	0.082
665860	SELK	NM_021237	3025248	SELENOPROTEIN K	-0.444	-0.718	-0.454	-0.369	0.847	0.474	0.248	0.5	0.43	0.492	0.235	1.118
665867	THC2623157				-0.29	-0.577	-0.199	-0.404	0.187	0.085	-0.043	-0.25	1.065	0.57	0.448	0.124
665909	SYNE2	NM_015180	2873322	SPECTRIN REPEAT CONTAINING, NUCLEAR ENVELOPE 2	-1.248	-1.027	-0.923	0.285	-0.242	1.005	1.34	0.912	1.393	0.701	0.578	1.6
665939	SYNE2	NM_182910			-0.226	-0.119	-1.369	-1.703	1.006	0.649	0.998	-0.004	0.396	1.439	0.407	1.687
666062	BC019667	BC019667	2865395	WISKOTT-ALDRICH SYNDROME-LIKE	-0.463	-0.301	-0.348	-0.422	-0.215	-0.219	-0.198	0.072	0.879	0.052	1.453	0.642
666339	HIC1	NM_006497	2874215	HYPERMETHYLATED IN CANCER 1	-0.653	-0.476	-0.204	-0.12	0.539	0.614	0.186	-0.004	1.16	0.801	0.81	0.377
667414	RIPK2	NM_003821	2875685	RECEPTOR-INTERACTING SERINE-THREONINE KINASE 2	-0.658	-0.6	-0.649	-0.311	-0.031	0.19	-0.203	0.083	1.248	0.182	0.505	-0.01
667697	SLA2	NM_032214	2869728	SRC-LIKE-ADAPTOR 2	-0.407	-0.428	-1.357	-0.487	0.098	0.584	0.809	-0.116	0.289	0.725	1.079	0.11
667952	IL2	NM_000586	2864938	INTERLEUKIN 2	-0.684	-1.129	-1.308	-0.542	0.407	0.139	0.573	-0.578	0.218	0.809	0.67	0.361
668707	CYBA	NM_000101	2876628	CYTOCHROME B-245, ALPHA POLYPEPTIDE	-0.176	-1.373	-0.192	-0.837	0.639	0.308	0.334	0.709	0.416	-0.293	-0.037	0.054
668904	SLA	NM_006748	2863400	SRC-LIKE-ADAPTOR	-0.042	-0.494	-0.631	-0.575	0.135	0.448	0.242	-0.283	1.04	0.906	0.818	0.377
670203	CD6	NM_006725	2877519	CD6 ANTIGEN	-0.361	-0.936	-0.765	-1.045	0.651	0.731	0.529	0.083	0.724	0.725	0.855	-0.395
670236	FOXF1	NM_001451	2878348	FORKHEAD BOX F1	-0.627	-0.497	-0.302	-0.577	0.246	0.205	0.106	0.822	0.121	-0.204	-0.181	0.548
670324	CD244	NM_016382	2870952	CD244 NATURAL KILLER CELL RECEPTOR 2B4	0.034	-0.401	-0.439	-0.231	-0.039	0.52	0.484	-0.119	1.029	0.64	0.388	1.319
671307	MIAT	BF445151	2895413	HYPOTHETICAL GENE SUPPORTED BY AK098833	-0.853	-0.374	-1.297	-1.056	-0.366	1.171	0.689	0.744	0.254	1.512	0.71	0.999
671510	TNFSF15	NM_005118	2867438	TUMOR NECROSIS FACTOR (LIGAND) SUPERFAMILY, MEMBER 15	-1.118	-0.951	-0.563	-0.296	0.442	0.123	-0.119	0.594	0.17	-0.408	0.408	0.543
671571	FRAS1	AK027833	3026113	KIAA1500 PROTEIN	-1.157	-0.031	-0.477	-0.769	0.664	0.411	0.052	0.454	-0.035	0.469	-0.168	-0.071
671834	ALDH1L1	NM_012190	2865784	ALDEHYDE DEHYDROGENASE 1 FAMILY, MEMBER L1	-0.124	-0.335	-0.217	-0.401	0.223	0.328	-0.078	0.408	1.257	0.337	0.433	0.888
671890	THC2730567				-1.043	-1.288	-0.937	-1.129	-0.377	0.767	1.157	0.632	1.458	0.41	1.108	1.637
673238	KIAA1632	NM_020964	2874128	KIAA1632	-0.232	-1.096	-1.976	-0.164	0.03	-0.036	0.852	0.695	0.738	0.89	1.04	1.51
673342	NPC1	NM_000271	2873498	NIEMANN-PICK DISEASE, TYPE C1	0.063	-1.245	-0.518	-0.63	0.225	0.985	0.718	0.978	0.444	1.062	0.67	0.248
673435	A_24_P943238				-0.671	-2.668	-1.746	-0.508	0.661	2.281	0.878	0.823	-0.263	0.753	-0.008	0.795
673484	BC066989	BC066989	2874834	PMS1 POSTMEIOTIC SEGREGATION INCREASED 1 (S. CEREVISIAE)	-1.189	-1.107	-1.296	-0.77	0.127	-0.191	0.275	1.153	1.379	-0.157	1.041	1.06
673978	MAL	NM_002371	2869023	MAL, T-CELL DIFFERENTIATION PROTEIN	-0.16	-1.301	-1.109	-0.58	0.599	0.854	0.375	-0.288	0.591	0.119	0.884	0.468
674327	SYNE2	NM_015180			-1.531	-2.129	-1.44	-0.02	0.37	0.835	0.294	0.13	0.533	1.507	0.793	0.712
674417	GNG2	NM_053064	2960849	GUANINE NUCLEOTIDE BINDING PROTEIN (G PROTEIN), GAMMA 2	-1.206	-1.849	-1.616	-0.381	0.335	0.512	1.22	0.867	0.319	1.106	1.088	1.621
674522	CCL4	NM_002984	2872279	CHEMOKINE (C-C MOTIF) LIGAND 4	-0.722	-0.946	-0.657	-0.992	1	0.345	0.863	1.19	0.687	0.562	0.712	1.284
675038	ZNF74	NM_003426	2859845	ZINC FINGER PROTEIN 74 (COS52)	-1.191	-0.363	-0.643	-1.146	0.672	0.329	0.084	0.263	0.202	0.766	0.139	1.2
675062	UAP1	NM_003115	2865349	UDP-N-ACTEYLGLUCOSAMINE PYROPHOSPHORYLASE 1	-0.499	-1.02	-3.048	-2.718	0.302	1.376	0.438	0.372	-0.624	0.343	1.064	0.292
675155	FCGR3B	NM_000570	2859094	FC FRAGMENT OF IGG, LOW AFFINITY IIIB, RECEPTOR (CD16B)	-1.332	-1.461	-0.453	-1.153	0.908	1.15	1.699	0.475	1.106	1.36	1.338	0.187
675945	GNPTAB	NM_024312			-0.359	-0.685	-0.471	-0.728	0.31	0.425	-0.142	0.073	0.67	0.918	0.86	0.996
675952	S1PR5	NM_030760	2875904	ENDOTHELIAL DIFFERENTIATION, SPHINGOLIPID G-PROTEIN-COUPLED RECEPTOR, 8	-0.816	-0.814	-1.742	-1.026	0.684	0.882	0.57	0.863	0.865	0.649	0.226	1.083
675995	S1PR5	NM_030760			-1.201	-1.395	-1.66	-0.28	0.691	0.76	0.481	0.997	1.39	0.81	0.736	0.465
677200	AFARP1	NR_002796	2863537	AKR7 FAMILY PSEUDOGENE	-0.453	-0.666	-0.389	-0.269	0.451	0.37	0.158	0.884	0.392	-0.045	-0.289	0.729
678267	SLITRK6	NM_032229	3030079	SLIT AND NTRK-LIKE FAMILY, MEMBER 6	-0.47	-1.348	-0.967	-0.546	0.383	1.642	0.136	0.671	0.06	0.408	0.723	0.692
678449	A_24_P101493				-1.011	-0.555	-0.601	-1.287	-0.46	0.851	0.294	0.221	0.773	0.754	0.203	0.639
678818	ZNF689	NM_138447	2864794	ZINC FINGER PROTEIN 689	0.075	-0.638	-0.421	-0.775	0.117	0.317	0.614	1.12	0.645	0.002	0.442	0.617
679073	FCGR3A	NM_000569	2875597	FC FRAGMENT OF IGG, LOW AFFINITY IIIA, RECEPTOR (CD16A)	-1.202	-1.291	-1.036	-0.552	1.175	0.516	1.365	0.761	0.609	0.716	0.335	0.799
679224	CR936609	CR936609			-0.786	-0.524	-0.554	-1.875	0.126	0.356	-0.176	0.331	0.998	0.883	0.022	0.699
679374	ABI1	NM_005470	2877282	ABL-INTERACTOR 1	-0.344	-0.681	-0.14	-0.609	0.205	0.335	0.402	0.368	0.72	0.451	1.205	0.403
679954	CCL23	NM_005064	2865132	CHEMOKINE (C-C MOTIF) LIGAND 23	-0.694	-0.967	-0.759	-0.783	1.215	0.509	1.1	1.307	0.75	0.383	0.927	1.71
680690	C1orf38	NM_004848	2863652	CHROMOSOME 1 OPEN READING FRAME 38	-0.666	-0.417	-1.543	-0.675	0.819	0.278	0.134	0.914	0.716	0.461	0.377	0.346
680714	RORA	NM_134260	2864571	RAR-RELATED ORPHAN RECEPTOR A	-1.678	-0.928	-2.093	-0.523	0.234	0.872	0.417	0.363	0.428	0.772	0.893	0.144
680874	ST3GAL4	NM_006278	3029646	ST3 BETA-GALACTOSIDE ALPHA-2,3-SIALYLTRANSFERASE 4	-0.061	-0.892	-0.629	-0.579	0.892	0.061	0.161	1.037	0.573	0.888	0.594	0.584
680890	FN1	NM_054034	2865711	FIBRONECTIN 1	-0.294	-0.388	-0.651	-0.091	0.527	0.032	0.071	0.305	0.259	-0.096	0.407	0.503
681005	SNX16	NM_022133	3027601	SORTING NEXIN 16	-0.663	-1.219	-1.416	-1.513	0.186	-0.112	0.445	-0.467	-0.043	1.693	0.22	0.291
681011	C13orf36	NM_203451	3024711	HYPOTHETICAL LOC400120	-0.606	0.196	-0.813	-0.888	0.417	0.592	0.734	0.006	0.295	0.901	0.605	0.352
681074	TMEM155	NM_152399	2873245	HYPOTHETICAL PROTEIN FLJ30834	-0.428	-0.368	-0.736	-0.264	0.306	0.051	-0.178	0.579	0.561	0.015	0.144	0.399
CLUSTER 5 ONTOGENY
Category	Term	Count	%	PValue	Genes	List Total	Pop Hits	Pop Total	Fold Enrichment	Bonferroni	Benjamini	FDR
PANTHER_BP_ALL	BP00207:Cell cycle control	6	6.06%	0.007698491733445995	2874128, 2874180, 3027768, 2865132, 2872279, 3025735,	97	374	29414	4.864766525166768	0.8173568774957587	0.28826116247129663	9.369220260123212
PANTHER_BP_ALL	BP00143:Cation transport	23	23.23%	0.028699170997339082	2876440, 3029530, 2874834, 3027768, 2878296, 2877519, 2991696, 2873322, 2865132, 2862629, 2862793, 2872641, 2865711, 3025735, 2875904, 2869739, 2874180, 2868418, 2888214, 3029646, 2872279, 2864571, 2865178,	97	4462	29414	1.5630779041343394	0.9983486958622666	0.4414331106213967	30.972679038106943
PANTHER_BP_ALL	BP00008:Tricarboxylic acid pathway	6	6.06%	0.0018834771450713969	2860121, 2878896, 2859094, 2888214, 2865395, 2865711,	97	268	29414	6.788890598553624	0.33949836925716204	0.12912070633622696	2.371246471393529
PANTHER_BP_ALL	BP00204:Cytokinesis	7	7.07%	0.03190453157396825	2946021, 2873307, 2878296, 3029646, 2865395, 2864995, 2865784,	97	727	29414	2.9197521235411728	0.9992020031241885	0.4223132596186787	33.81690784187272
PANTHER_BP_ALL	BP00107:Cytokine and chemokine mediated signaling pathway	6	6.06%	0.03545444803474443	2864938, 2878896, 2888214, 3029646, 2877519, 3028722,	97	555	29414	3.278239063806074	0.9996443659188933	0.41106564187726535	36.84059783897553
PANTHER_BP_ALL	BP00104:G-protein mediated signaling	25	25.25%	0.002363638498818648	2876628, 2877282, 2864794, 2868195, 2876886, 2872967, 2874180, 2875527, 2872279, 2864938, 2874834, 3027768, 2878296, 2872230, 2865132, 2865711, 2872641, 2960849, 2863170, 2859045, 2863652, 2875904, 3028124, 2888214, 2865178,	97	4056	29414	1.8690650480896316	0.40584555583408655	0.12203978237928326	2.967411555137689
PANTHER_BP_ALL	BP00103:Cell surface receptor mediated signal transduction	22	22.22%	1.5421605881396925E-4	2864938, 3028991, 2874834, 3027768, 2877282, 2878296, 2864794, 2874023, 2872230, 2865132, 2872641, 3030079, 2865711, 2960849, 2876886, 2863652, 2875904, 2868418, 2888214, 3029646, 2872279, 2865178,	97	2721	29414	2.4517517437873435	0.033360977301721495	0.033360977301721495	0.196130251836657
PANTHER_BP_ALL	BP00102:Signal transduction	29	29.29%	2.3298470462000085E-4	2859706, 2865253, 2859094, 2877282, 2877519, 3030079, 2863400, 2875597, 2876886, 2874180, 3029646, 2872279, 2875527, 2864938, 2878896, 3027768, 2874023, 2865132, 2872230, 3025735, 2865711, 2960849, 2859045, 3026437, 2875904, 2888214, 3028722, 2865784, 2869728,	97	4356	29414	2.018796209517859	0.04997084648698158	0.025305610197217554	0.2961705163594508
PANTHER_BP_ALL	BP00048:mRNA splicing	34	34.34%	0.03187031166838582	3029414, 2859094, 2874128, 2877282, 2877519, 3028133, 2863400, 2875597, 2872967, 2860312, 3025842, 2868418, 2873245, 2865395, 2872279, 2865697, 2979791, 2864938, 2883449, 2895413, 2871453, 2878296, 2873322, 2865711, 3025248, 3026768, 2859045, 2863170, 2863652, 3024711, 3027634, 2888214, 3028722, 2865784,	97	7484	29414	1.3776138235796502	0.9991957734329457	0.4477765206393537	33.787122304304106
PANTHER_BP_ALL	BP00274:Cell communication	10	10.10%	0.034527907685710596	2875597, 3026437, 2878896, 3024895, 2874834, 2946021, 2888214, 2873245, 2872279, 2865711,	97	1367	29414	2.2182671060867727	0.9995607220211148	0.42430073663936385	36.06392967996228
PANTHER_BP_ALL	BP00150:MHCI-mediated immunity	28	28.28%	0.01377608718158728	2865253, 2870952, 2876886, 2872967, 2860312, 2873307, 2865395, 2872279, 2863537, 3026113, 3027621, 2878896, 2874834, 2875685, 2878296, 2873322, 2865711, 2872641, 2862793, 3026768, 2870813, 2867438, 2874941, 3024711, 2888214, 3028722, 2865178, 2865784,	97	5445	29414	1.5593460376965531	0.9527266596657162	0.3533646093058642	16.186856706067754
PANTHER_BP_ALL	BP00044:mRNA transcription regulation	46	46.46%	0.013393432461490457	2865253, 2859094, 2874128, 2877282, 2864794, 2877519, 2868195, 3028133, 2863400, 2870952, 2876886, 3026877, 2875597, 2860312, 2868418, 2873307, 3029646, 2873245, 2872279, 2875527, 3026113, 3027621, 2859845, 2864938, 2878896, 2883449, 2874834, 2875685, 2873322, 2872641, 2865711, 3025735, 3026768, 2869023, 2867438, 2859045, 2863170, 2878348, 2873498, 2874215, 2877732, 2875904, 2869739, 2888214, 302…	97	10414	29414	1.3394379889086656	0.9485150302017414	0.39006988487556526	15.771960087326464
PANTHER_BP_ALL	BP00149:T-cell mediated immunity	22	22.22%	0.024592264786857478	2864938, 2878896, 2865253, 2874834, 2875685, 2862793, 2865711, 2870952, 2870813, 3026768, 2867438, 2875597, 2874941, 2872967, 3024711, 2868418, 2873307, 2888214, 3028722, 2865395, 2872279, 3026113,	97	4138	29414	1.6121837831912424	0.9958220525621012	0.4217757557167985	27.163877542738213
PANTHER_BP_ALL	BP00148:Immunity and defense	13	13.13%	0.019632356053635072	2876628, 2874440, 2871354, 2877282, 2874023, 2877519, 2870952, 2960849, 3026877, 2876886, 2873307, 2865395, 2872279,	97	1885	29414	2.091290437255599	0.9872481481190979	0.38410292728099626	22.30612250923778
PANTHER_BP_ALL	BP00040:mRNA transcription	32	32.32%	0.01767971792111819	2865253, 2877282, 2871354, 2864794, 3024217, 2863400, 2876886, 2873307, 3029646, 2872279, 2875527, 3027621, 2864938, 2859845, 2878896, 3025616, 2883449, 2874834, 2875685, 2873322, 3025735, 2865711, 3026768, 2859045, 2878348, 2863170, 2874941, 2874215, 2875904, 2888214, 3028722, 2865178,	97	6626	29414	1.4644714199918472	0.9802446633559038	0.3877052236867089	20.313124816097417
PANTHER_BP_ALL:BP00103:Cell surface receptor mediated signal transduction	22 Gene(s)
DAVIDID	DAVID Gene Name	Micro array SeqName	Bright mean	D2A+ mean	D2A- mean
2863652	CHROMOSOME 1 OPEN READING FRAME 38	C1orf38	-0.82525	0.53625	0.475
2864794	ZINC FINGER PROTEIN 689	ZNF689	-0.43975	0.542	0.4265
2864938	INTERLEUKIN 2	IL2	-0.91575	0.13525	0.5145
2865132	CHEMOKINE (C-C MOTIF) LIGAND 23	CCL23	-0.80075	1.03275	0.9425
2865178	TSPY-LIKE 2	TSPYL2	-0.49125	0.43125	0.677
2865711	FIBRONECTIN 1	FN1	-0.356	0.23375	0.26825
2868418	CDNA FLJ42602 FIS, CLONE BRACE3011271, MODERATELY SIMILAR TO PATCHED PROTEIN	PTCH1	-2.11775	0.813	0.741
2872230	G PROTEIN-COUPLED RECEPTOR 56	GPR56	-0.7505	0.95875	0.708
2872279	CHEMOKINE (C-C MOTIF) LIGAND 4	CCL4	-0.82925	0.8495	0.81125
2872641	PLATELET-ACTIVATING FACTOR ACETYLHYDROLASE 2, 40KDA	AK128436	-1.829	0.6425	0.90625
2874023	CD48 ANTIGEN (B-CELL MEMBRANE PROTEIN)	CD48	-0.822	0.52125	0.4895
2874834	PMS1 POSTMEIOTIC SEGREGATION INCREASED 1 (S. CEREVISIAE)	BC066989	-1.0905	0.341	0.83075
2875904	ENDOTHELIAL DIFFERENTIATION, SPHINGOLIPID G-PROTEIN-COUPLED RECEPTOR, 8	S1PR5	-1.0995	0.74975	0.70575
2876886	KILLER CELL IMMUNOGLOBULIN-LIKE RECEPTOR, TWO DOMAINS, LONG CYTOPLASMIC TAIL, 5A	KIR2DL5A	-0.77625	0.57475	0.972
2877282	ABL-INTERACTOR 1	ABI1	-0.4435	0.3275	0.69475
2878296	CYCLIN-DEPENDENT KINASE INHIBITOR 1B (P27, KIP1)	CDKN1B	-0.401	0.25975	0.63375
2888214	KILLER CELL IMMUNOGLOBULIN-LIKE RECEPTOR, THREE DOMAINS, LONG CYTOPLASMIC TAIL, 1	KIR3DL1	-0.73575	0.475	0.82075
2960849	GUANINE NUCLEOTIDE BINDING PROTEIN (G PROTEIN), GAMMA 2	GNG2	-1.263	0.7335	1.0335
3027768	CHEMOKINE (C-C MOTIF) LIGAND 3	CCL3	-0.819	1.048	0.9135
3028991	KSP37 PROTEIN	FGFBP2	-1.013	0.49175	0.9215
3029646	ST3 BETA-GALACTOSIDE ALPHA-2,3-SIALYLTRANSFERASE 4	ST3GAL4	-0.54025	0.53775	0.65975
3030079	SLIT AND NTRK-LIKE FAMILY, MEMBER 6	SLITRK6	-0.83275	0.708	0.47075
PANTHER_BP_ALL:BP00102:Signal transduction	29 Gene(s)
DAVIDID	DAVID Gene Name	Micro array SeqName	Bright mean	D2A+ mean	D2A- mean
2859045	TRM5 TRNA METHYLTRANSFERASE 5 HOMOLOG (S. CEREVISIAE)	TRMT5	-0.5345	0.3705	0.389
2859094	FC FRAGMENT OF IGG, LOW AFFINITY IIIB, RECEPTOR (CD16B)	FCGR3B	-1.09975	1.058	0.99775
2859706	CYTOCHROME C, SOMATIC	CYCS	-0.68125	0.59525	0.4225
2863400	SRC-LIKE-ADAPTOR	SLA	-0.4355	0.1355	0.78525
2864938	INTERLEUKIN 2	IL2	-0.91575	0.13525	0.5145
2865132	CHEMOKINE (C-C MOTIF) LIGAND 23	CCL23	-0.80075	1.03275	0.9425
2865253	PROTEIN PHOSPHATASE 2, REGULATORY SUBUNIT B (B56), GAMMA ISOFORM	PPP2R5C	-0.5085	0.399	0.62375
2865711	FIBRONECTIN 1	FN1	-0.356	0.23375	0.26825
2865784	ALDEHYDE DEHYDROGENASE 1 FAMILY, MEMBER L1	ALDH1L1	-0.26925	0.22025	0.72875
2869728	SRC-LIKE-ADAPTOR 2	SLA2	-0.66975	0.34375	0.55075
2872230	G PROTEIN-COUPLED RECEPTOR 56	GPR56	-0.7505	0.95875	0.708
2872279	CHEMOKINE (C-C MOTIF) LIGAND 4	CCL4	-0.82925	0.8495	0.81125
2874023	CD48 ANTIGEN (B-CELL MEMBRANE PROTEIN)	CD48	-0.822	0.52125	0.4895
2874180	CHEMOKINE (C-C MOTIF) LIGAND 5	CCL5	-1.035	0.642	0.56175
2875527	HYPOTHETICAL PROTEIN DKFZP762B226	GNPTAB	-0.575	0.622	0.572
2875597	FC FRAGMENT OF IGG, LOW AFFINITY IIIA, RECEPTOR (CD16A)	FCGR3A	-1.02025	0.95425	0.61475
2875904	ENDOTHELIAL DIFFERENTIATION, SPHINGOLIPID G-PROTEIN-COUPLED RECEPTOR, 8	S1PR5	-1.0995	0.74975	0.70575
2876886	KILLER CELL IMMUNOGLOBULIN-LIKE RECEPTOR, TWO DOMAINS, LONG CYTOPLASMIC TAIL, 5A	KIR2DL5A	-0.77625	0.57475	0.972
2877282	ABL-INTERACTOR 1	ABI1	-0.4435	0.3275	0.69475
2877519	CD6 ANTIGEN	CD6	-0.77675	0.4985	0.47725
2878896	KILLER CELL IMMUNOGLOBULIN-LIKE RECEPTOR, TWO DOMAINS, LONG CYTOPLASMIC TAIL, 3	KIR2DS4	-0.4955	0.49525	0.705
2888214	KILLER CELL IMMUNOGLOBULIN-LIKE RECEPTOR, THREE DOMAINS, LONG CYTOPLASMIC TAIL, 1	KIR3DL1	-0.73575	0.475	0.82075
2960849	GUANINE NUCLEOTIDE BINDING PROTEIN (G PROTEIN), GAMMA 2	GNG2	-1.263	0.7335	1.0335
3025735	CHEMOKINE (C-C MOTIF) LIGAND 3-LIKE 1	CCL3L3	-0.938	1.04875	0.914
3026437	WINGLESS-TYPE MMTV INTEGRATION SITE FAMILY, MEMBER 11	WNT11	-0.599	0.702	0.1675
3027768	CHEMOKINE (C-C MOTIF) LIGAND 3	CCL3	-0.819	1.048	0.9135
3028722	HYPOTHETICAL PROTEIN LOC55580	CCDC88A	-0.99875	0.2855	0.35025
3029646	ST3 BETA-GALACTOSIDE ALPHA-2,3-SIALYLTRANSFERASE 4	ST3GAL4	-0.54025	0.53775	0.65975
3030079	SLIT AND NTRK-LIKE FAMILY, MEMBER 6	SLITRK6	-0.83275	0.708	0.47075
PANTHER_BP_ALL:BP00044:mRNA transcription regulation	46 Gene(s)
DAVIDID	DAVID Gene Name	Micro array SeqName	Bright mean	D2A+ mean	D2A- mean
2859045	TRM5 TRNA METHYLTRANSFERASE 5 HOMOLOG (S. CEREVISIAE)	TRMT5	-0.5345	0.3705	0.389
2859094	FC FRAGMENT OF IGG, LOW AFFINITY IIIB, RECEPTOR (CD16B)	FCGR3B	-1.09975	1.058	0.99775
2859845	ZINC FINGER PROTEIN 74 (COS52)	ZNF74	-0.83575	0.337	0.57675
2860312	MYOSIN IF	MYO1F	-0.12625	0.3055	0.64275
2863170	RIBOSOMAL PROTEIN S6 KINASE, 70KDA, POLYPEPTIDE 1	RPS6KB1	-0.78625	-0.069	0.65525
2863400	SRC-LIKE-ADAPTOR	SLA	-0.4355	0.1355	0.78525
2864794	ZINC FINGER PROTEIN 689	ZNF689	-0.43975	0.542	0.4265
2864938	INTERLEUKIN 2	IL2	-0.91575	0.13525	0.5145
2865178	TSPY-LIKE 2	TSPYL2	-0.49125	0.43125	0.677
2865253	PROTEIN PHOSPHATASE 2, REGULATORY SUBUNIT B (B56), GAMMA ISOFORM	PPP2R5C	-0.5085	0.399	0.62375
2865711	FIBRONECTIN 1	FN1	-0.356	0.23375	0.26825
2867438	TUMOR NECROSIS FACTOR (LIGAND) SUPERFAMILY, MEMBER 15	TNFSF15	-0.732	0.26	0.17825
2868195	FASCICULATION AND ELONGATION PROTEIN ZETA 1 (ZYGIN I)	FEZ1	-0.77925	1.0815	0.65275
2868418	CDNA FLJ42602 FIS, CLONE BRACE3011271, MODERATELY SIMILAR TO PATCHED PROTEIN	PTCH1	-2.11775	0.813	0.741
2869023	MAL, T-CELL DIFFERENTIATION PROTEIN	MAL	-0.7875	0.385	0.5155
2869739	PROTEASE, SERINE, 23	PRSS23	-1.45675	0.53325	1.18925
2870952	CD244 NATURAL KILLER CELL RECEPTOR 2B4	CD244	-0.25925	0.2115	0.844
2872279	CHEMOKINE (C-C MOTIF) LIGAND 4	CCL4	-0.82925	0.8495	0.81125
2872641	PLATELET-ACTIVATING FACTOR ACETYLHYDROLASE 2, 40KDA	AK128436	-1.829	0.6425	0.90625
2873245	HYPOTHETICAL PROTEIN FLJ30834	TMEM155	-0.449	0.1895	0.27975
2873307	TUBULIN TYROSINE LIGASE-LIKE FAMILY, MEMBER 3	TTLL3	-0.523	-0.09175	0.799
2873322	SPECTRIN REPEAT CONTAINING, NUCLEAR ENVELOPE 2	SYNE2	-0.78475	0.675	1.117
2873498	NIEMANN-PICK DISEASE, TYPE C1	NPC1	-0.5825	0.7265	0.606
2874128	KIAA1632	KIAA1632	-0.867	0.38525	1.0445
2874215	HYPERMETHYLATED IN CANCER 1	HIC1	-0.36325	0.33375	0.787
2874834	PMS1 POSTMEIOTIC SEGREGATION INCREASED 1 (S. CEREVISIAE)	BC066989	-1.0905	0.341	0.83075
2875527	HYPOTHETICAL PROTEIN DKFZP762B226	GNPTAB	-0.575	0.622	0.572
2875597	FC FRAGMENT OF IGG, LOW AFFINITY IIIA, RECEPTOR (CD16A)	FCGR3A	-1.02025	0.95425	0.61475
2875685	RECEPTOR-INTERACTING SERINE-THREONINE KINASE 2	RIPK2	-0.5545	0.00975	0.48125
2875904	ENDOTHELIAL DIFFERENTIATION, SPHINGOLIPID G-PROTEIN-COUPLED RECEPTOR, 8	S1PR5	-1.0995	0.74975	0.70575
2876886	KILLER CELL IMMUNOGLOBULIN-LIKE RECEPTOR, TWO DOMAINS, LONG CYTOPLASMIC TAIL, 5A	KIR2DL5A	-0.77625	0.57475	0.972
2877282	ABL-INTERACTOR 1	ABI1	-0.4435	0.3275	0.69475
2877519	CD6 ANTIGEN	CD6	-0.77675	0.4985	0.47725
2877732	HSPC107	EEPD1	-1.1305	0.10525	0.77625
2878348	FORKHEAD BOX F1	FOXF1	-0.50075	0.34475	0.071
2878896	KILLER CELL IMMUNOGLOBULIN-LIKE RECEPTOR, TWO DOMAINS, LONG CYTOPLASMIC TAIL, 3	KIR2DS4	-0.4955	0.49525	0.705
2883449	SHC (SRC HOMOLOGY 2 DOMAIN CONTAINING) FAMILY, MEMBER 4	SHC4	-0.2805	0.45525	0.679
2888214	KILLER CELL IMMUNOGLOBULIN-LIKE RECEPTOR, THREE DOMAINS, LONG CYTOPLASMIC TAIL, 1	KIR3DL1	-0.73575	0.475	0.82075
3025735	CHEMOKINE (C-C MOTIF) LIGAND 3-LIKE 1	CCL3L3	-0.938	1.04875	0.914
3026113	KIAA1500 PROTEIN	FRAS1	-0.6085	0.39525	0.04875
3026768	HYPOTHETICAL PROTEIN LOC58481	WASH1	-0.52225	0.2255	0.44925
3026877	COP9 CONSTITUTIVE PHOTOMORPHOGENIC HOMOLOG SUBUNIT 4 (ARABIDOPSIS)	COPS4	-1.193	0.3535	0.252
3027621	RAB11 FAMILY INTERACTING PROTEIN 4 (CLASS II)	RAB11FIP4	-0.53675	0.26875	0.2485
3028133	FK506 BINDING PROTEIN 11, 19 KDA	FKBP11	-0.5745	0.826	0.796
3028722	HYPOTHETICAL PROTEIN LOC55580	CCDC88A	-0.99875	0.2855	0.35025
3029646	ST3 BETA-GALACTOSIDE ALPHA-2,3-SIALYLTRANSFERASE 4	ST3GAL4	-0.54025	0.53775	0.65975
PANTHER_BP_ALL:BP00150:MHCI-mediated immunity	28 Gene(s)
DAVIDID	DAVID Gene Name	Micro array SeqName	Bright mean	D2A+ mean	D2A- mean
2860312	MYOSIN IF	MYO1F	-0.12625	0.3055	0.64275
2862793	ATP SYNTHASE, H+ TRANSPORTING, MITOCHONDRIAL F0 COMPLEX, SUBUNIT E	ATP5I	-0.5585	0.03075	0.47125
2863537	AKR7 FAMILY PSEUDOGENE	AFARP1	-0.44425	0.46575	0.19675
2865178	TSPY-LIKE 2	TSPYL2	-0.49125	0.43125	0.677
2865253	PROTEIN PHOSPHATASE 2, REGULATORY SUBUNIT B (B56), GAMMA ISOFORM	PPP2R5C	-0.5085	0.399	0.62375
2865395	WISKOTT-ALDRICH SYNDROME-LIKE	BC019667	-0.3835	-0.14	0.7565
2865711	FIBRONECTIN 1	FN1	-0.356	0.23375	0.26825
2865784	ALDEHYDE DEHYDROGENASE 1 FAMILY, MEMBER L1	ALDH1L1	-0.26925	0.22025	0.72875
2867438	TUMOR NECROSIS FACTOR (LIGAND) SUPERFAMILY, MEMBER 15	TNFSF15	-0.732	0.26	0.17825
2870813	SERINE/THREONINE KINASE 4	BF433725	-0.621	0.56975	0.50975
2870952	CD244 NATURAL KILLER CELL RECEPTOR 2B4	CD244	-0.25925	0.2115	0.844
2872279	CHEMOKINE (C-C MOTIF) LIGAND 4	CCL4	-0.82925	0.8495	0.81125
2872641	PLATELET-ACTIVATING FACTOR ACETYLHYDROLASE 2, 40KDA	AK128436	-1.829	0.6425	0.90625
2872967	HYPOTHETICAL PROTEIN LOC144501	KRT80	-0.67	0.52975	0.26175
2873307	TUBULIN TYROSINE LIGASE-LIKE FAMILY, MEMBER 3	TTLL3	-0.523	-0.09175	0.799
2873322	SPECTRIN REPEAT CONTAINING, NUCLEAR ENVELOPE 2	SYNE2	-0.78475	0.675	1.117
2874834	PMS1 POSTMEIOTIC SEGREGATION INCREASED 1 (S. CEREVISIAE)	BC066989	-1.0905	0.341	0.83075
2874941	SIGNAL TRANSDUCER AND ACTIVATOR OF TRANSCRIPTION 4	STAT4	-0.507	0.3445	0.4135
2875685	RECEPTOR-INTERACTING SERINE-THREONINE KINASE 2	RIPK2	-0.5545	0.00975	0.48125
2876886	KILLER CELL IMMUNOGLOBULIN-LIKE RECEPTOR, TWO DOMAINS, LONG CYTOPLASMIC TAIL, 5A	KIR2DL5A	-0.77625	0.57475	0.972
2878296	CYCLIN-DEPENDENT KINASE INHIBITOR 1B (P27, KIP1)	CDKN1B	-0.401	0.25975	0.63375
2878896	KILLER CELL IMMUNOGLOBULIN-LIKE RECEPTOR, TWO DOMAINS, LONG CYTOPLASMIC TAIL, 3	KIR2DS4	-0.4955	0.49525	0.705
2888214	KILLER CELL IMMUNOGLOBULIN-LIKE RECEPTOR, THREE DOMAINS, LONG CYTOPLASMIC TAIL, 1	KIR3DL1	-0.73575	0.475	0.82075
3024711	HYPOTHETICAL LOC400120	C13orf36	-0.52775	0.43725	0.53825
3026113	KIAA1500 PROTEIN	FRAS1	-0.6085	0.39525	0.04875
3026768	HYPOTHETICAL PROTEIN LOC58481	WASH1	-0.52225	0.2255	0.44925
3027621	RAB11 FAMILY INTERACTING PROTEIN 4 (CLASS II)	RAB11FIP4	-0.53675	0.26875	0.2485
3028722	HYPOTHETICAL PROTEIN LOC55580	CCDC88A	-0.99875	0.2855	0.35025
PANTHER_BP_ALL:BP00040:mRNA transcription	32 Gene(s)
DAVIDID	DAVID Gene Name	Micro array SeqName	Bright mean	D2A+ mean	D2A- mean
2859045	TRM5 TRNA METHYLTRANSFERASE 5 HOMOLOG (S. CEREVISIAE)	TRMT5	-0.5345	0.3705	0.389
2859845	ZINC FINGER PROTEIN 74 (COS52)	ZNF74	-0.83575	0.337	0.57675
2863170	RIBOSOMAL PROTEIN S6 KINASE, 70KDA, POLYPEPTIDE 1	RPS6KB1	-0.78625	-0.069	0.65525
2863400	SRC-LIKE-ADAPTOR	SLA	-0.4355	0.1355	0.78525
2864794	ZINC FINGER PROTEIN 689	ZNF689	-0.43975	0.542	0.4265
2864938	INTERLEUKIN 2	IL2	-0.91575	0.13525	0.5145
2865178	TSPY-LIKE 2	TSPYL2	-0.49125	0.43125	0.677
2865253	PROTEIN PHOSPHATASE 2, REGULATORY SUBUNIT B (B56), GAMMA ISOFORM	PPP2R5C	-0.5085	0.399	0.62375
2865711	FIBRONECTIN 1	FN1	-0.356	0.23375	0.26825
2871354	SIGNAL TRANSDUCER AND ACTIVATOR OF TRANSCRIPTION 2, 113KDA	BE825944	-0.9645	0.30475	0.75925
2872279	CHEMOKINE (C-C MOTIF) LIGAND 4	CCL4	-0.82925	0.8495	0.81125
2873307	TUBULIN TYROSINE LIGASE-LIKE FAMILY, MEMBER 3	TTLL3	-0.523	-0.09175	0.799
2873322	SPECTRIN REPEAT CONTAINING, NUCLEAR ENVELOPE 2	SYNE2	-0.78475	0.675	1.117
2874215	HYPERMETHYLATED IN CANCER 1	HIC1	-0.36325	0.33375	0.787
2874834	PMS1 POSTMEIOTIC SEGREGATION INCREASED 1 (S. CEREVISIAE)	BC066989	-1.0905	0.341	0.83075
2874941	SIGNAL TRANSDUCER AND ACTIVATOR OF TRANSCRIPTION 4	STAT4	-0.507	0.3445	0.4135
2875527	HYPOTHETICAL PROTEIN DKFZP762B226	GNPTAB	-0.575	0.622	0.572
2875685	RECEPTOR-INTERACTING SERINE-THREONINE KINASE 2	RIPK2	-0.5545	0.00975	0.48125
2875904	ENDOTHELIAL DIFFERENTIATION, SPHINGOLIPID G-PROTEIN-COUPLED RECEPTOR, 8	S1PR5	-1.0995	0.74975	0.70575
2876886	KILLER CELL IMMUNOGLOBULIN-LIKE RECEPTOR, TWO DOMAINS, LONG CYTOPLASMIC TAIL, 5A	KIR2DL5A	-0.77625	0.57475	0.972
2877282	ABL-INTERACTOR 1	ABI1	-0.4435	0.3275	0.69475
2878348	FORKHEAD BOX F1	FOXF1	-0.50075	0.34475	0.071
2878896	KILLER CELL IMMUNOGLOBULIN-LIKE RECEPTOR, TWO DOMAINS, LONG CYTOPLASMIC TAIL, 3	KIR2DS4	-0.4955	0.49525	0.705
2883449	SHC (SRC HOMOLOGY 2 DOMAIN CONTAINING) FAMILY, MEMBER 4	SHC4	-0.2805	0.45525	0.679
2888214	KILLER CELL IMMUNOGLOBULIN-LIKE RECEPTOR, THREE DOMAINS, LONG CYTOPLASMIC TAIL, 1	KIR3DL1	-0.73575	0.475	0.82075
3024217	SPI-C TRANSCRIPTION FACTOR (SPI-1/PU.1 RELATED)	SPIC	-1.193	0.55525	0.749
3025616	PROLINE-SERINE-THREONINE PHOSPHATASE INTERACTING PROTEIN 2	PSTPIP2	-0.63025	0.4245	1.44025
3025735	CHEMOKINE (C-C MOTIF) LIGAND 3-LIKE 1	CCL3L3	-0.938	1.04875	0.914
3026768	HYPOTHETICAL PROTEIN LOC58481	WASH1	-0.52225	0.2255	0.44925
3027621	RAB11 FAMILY INTERACTING PROTEIN 4 (CLASS II)	RAB11FIP4	-0.53675	0.26875	0.2485
3028722	HYPOTHETICAL PROTEIN LOC55580	CCDC88A	-0.99875	0.2855	0.35025
3029646	ST3 BETA-GALACTOSIDE ALPHA-2,3-SIALYLTRANSFERASE 4	ST3GAL4	-0.54025	0.53775	0.65975
CLUSTER 6
micro array SeqID	Micro array SeqName	Accesion #	DAVIDID	DAVID Gene Name	Bright #1	Bright #2	Bright #3	Bright #4	D2A+ #1	D2A+ #2	D2A+ #3	D2A+ #4	D2A- #1	D2A- #2	D2A- #3	D2A- #4
640937	ACTC1	NM_005159	2923158	ACTIN, ALPHA, CARDIAC MUSCLE	0.207	-0.276	0.233	0.169	-0.316	-0.298	-0.53	-0.043	0.108	0.366	0.225	0.318
641560	A_24_P25063				0.299	0.298	0.244	0.027	-0.261	-0.547	-0.126	-0.327	0.494	-0.157	0.12	0.379
641598	A_24_P383802				0.293	0.528	0.728	0.882	-1.185	-1.13	-0.826	-0.664	-0.46	-0.881	0.056	-0.536
641978	DKFZp434F142	AL136837	2862422	HYPOTHETICAL PROTEIN DKFZP434F142	0.108	0.339	0.548	0.119	-0.551	-0.211	-0.175	-0.777	0.195	-0.011	0.33	0.461
642135	RUNX2	NM_004348	2865938	RUNT-RELATED TRANSCRIPTION FACTOR 2	1.33	1.06	1.746	0.734	1.061	-2.119	-1.494	-1.97	-1.643	-1.237	-1.4	-1.214
642613	THC2548381				0.558	0.954	0.682	0.519	-0.017	-5.261	-5.506	-4.688	-0.106	-0.374	-0.611	-1.714
642926	BNIP3L	NM_004331	2867114	BCL2/ADENOVIRUS E1B 19KDA INTERACTING PROTEIN 3-LIKE	0.966	0.458	0.479	0.687	-0.462	-0.217	-1.004	-1.32	0.491	0.545	1.073	-0.134
644303	RPL39	NM_001000	3027257	RIBOSOMAL PROTEIN L39	0.438	0.545	0.347	-0.261	-0.414	-0.706	-0.508	-0.78	0.447	-0.172	0.132	0.701
645262	A_32_P205522				0.834	1.835	0.389	0.3	-0.27	-1.396	-1.698	-0.576	0.864	0.692	0.689	0.471
645270	CHST7	NM_019886	2877919	CARBOHYDRATE (N-ACETYLGLUCOSAMINE 6-O) SULFOTRANSFERASE 7	1.195	0.64	0.493	0.149	-0.53	-1.165	-0.872	-0.699	-0.444	0.008	0.8	-0.303
647599	PKN2	NM_006256	3026673	PROTEIN KINASE N2	0.535	0.221	0.235	0.117	-0.904	-0.445	-0.482	-0.357	-0.011	0.75	0.052	-0.103
648163	RUFY3	NM_014961	2860227	RUN AND FYVE DOMAIN CONTAINING 3	1.207	0.71	0.375	0.565	-0.721	-4.648	-3.604	-0.967	1.081	-0.135	-0.174	0.845
648230	BU956542	BU956542	3023757	SIMILAR TO RIBOSOMAL PROTEIN L13	0.42	0.236	0.229	0.258	-0.852	-0.384	-1.44	-0.735	-0.597	0.278	-0.497	-0.516
648351	LOC204010	BC107865	2864193	SIMILAR TO 40S RIBOSOMAL PROTEIN SA (P40) (34/67 KDA LAMININ RECEPTOR) (COLON CARCINOMA LAMININ-BINDING PROTEIN) (NEM/1CHD4) (MULTIDRUG RESISTANCE-ASSOCIATED PROTEIN MGR1-AG)	0.211	1.229	0.169	0.847	-0.752	-0.639	-0.623	-0.881	-0.728	0.077	-0.065	-0.283
648533	RABL2A	NM_013412	2865028	RAB, MEMBER OF RAS ONCOGENE FAMILY-LIKE 2A	0.016	-0.227	0.44	-0.337	0.069	-0.428	-1.646	-2.127	1.068	0.54	0.779	0.916
648737	GAS5	NR_002578	2968563	GROWTH ARREST-SPECIFIC 5	0.424	0.42	-0.047	0.684	-0.261	-1.371	-2.007	-1.223	0.383	-0.343	-0.018	0.902
650185	PHF17	AK127326	2865351	PHD FINGER PROTEIN 17	0.78	-0.245	0.354	1.023	-0.629	-1.119	-1.333	-2.346	0.418	0.401	-0.008	-0.182
650306	ABHD2	NM_007011	2876898	ABHYDROLASE DOMAIN CONTAINING 2	0.286	0.559	0.327	0.521	-0.876	-0.368	-0.214	-0.981	-0.69	0.045	-0.321	-0.102
650317	A_24_P238426				0.555	0.177	0.248	0.231	-0.597	-0.434	-1.57	-0.694	-0.5	0.023	-0.543	-0.544
650485	METT10D	NM_024086	2870656	METHYLTRANSFERASE 10 DOMAIN CONTAINING	-0.551	0.683	0.488	-0.844	-1.443	-1.532	-0.73	-1.724	0.159	0.392	0.291	1.959
650896	LOC286528	XM_210501	2875056	SIMILAR TO SSU72 RNA POLYMERASE II CTD PHOSPHATASE HOMOLOG	0.15	1.43	0.925	0.909	-3.16	-0.469	-2.312	-1.15	0.443	0.582	-0.456	0.909
651668	PLK2	NM_006622	2871503	POLO-LIKE KINASE 2 (DROSOPHILA)	0.357	0.617	1.109	1.811	-0.82	-0.825	-1.002	-2.247	-0.328	-1.754	-0.336	-1.457
652007	A_24_P654649				0.455	0.583	0.324	0.705	-1.012	-0.367	-0.734	-0.568	0.343	-0.122	-1.073	-0.175
652422	TMEM168	NM_022484	2864800	HYPOTHETICAL PROTEIN FLJ13576	-1.203	0.438	0.392	0.938	-1.386	-2.541	-2.665	-3.821	1.573	1.812	0.074	0.667
653224	STARD10	NM_006645	2863681	START DOMAIN CONTAINING 10	0.404	0.799	0.599	1.565	-1.175	-0.652	-1.112	-0.766	-1.041	-0.5	-1.494	0.405
654027	ENST00000287590	M74509			0.641	0.167	-0.019	0.552	-0.099	-0.707	-0.971	-0.593	0.19	0.459	-0.063	-0.298
654109	ITGA5	NM_002205	3026907	INTEGRIN, ALPHA 5 (FIBRONECTIN RECEPTOR, ALPHA POLYPEPTIDE)	0.105	0.144	0.553	0.99	-0.255	-0.789	-0.573	-0.683	-0.124	-0.617	-0.001	0.362
654259	DNM1P31				0.56	0.529	0.2	0.709	-1	-0.293	-0.783	-0.452	0.418	-0.266	-0.966	-0.1
654862	ITGAX	NM_000887	3028294	INTEGRIN, ALPHA X (COMPLEMENT COMPONENT 3 RECEPTOR 4 SUBUNIT)	0.444	0.899	0.505	0.421	-0.858	-1.261	-1.029	0.324	-0.36	-0.604	-0.834	-0.252
657245	A_24_P315326				0.424	0.232	0.126	0.245	-0.274	-0.372	-0.283	-1.067	-0.132	-0.115	-0.047	-0.394
657320	RP9	NM_203288	3027046	RETINITIS PIGMENTOSA 9 (AUTOSOMAL DOMINANT)	-0.049	0.249	0.594	0.349	-0.546	-0.548	-1.122	-0.725	0.758	0.783	0.037	1.556
657815	TEC	NM_003215	2860124	TEC PROTEIN TYROSINE KINASE	0.971	-0.257	0.733	0.454	-1.844	-1.63	-1.304	-2.989	-1.752	-0.748	0.086	-1.413
658992	RPL10A	NM_007104	3028042	RIBOSOMAL PROTEIN L10A	0.454	0.101	0.245	0.414	-0.791	-0.129	-0.388	-0.846	-0.178	-0.511	-0.658	-0.126
659376	A_24_P221375				0.427	0.097	0.168	0.106	-0.152	-0.324	-0.343	-0.935	-0.382	-0.305	-0.397	-0.401
659646	ENST00000312847				0.213	-0.28	0.156	0.066	-0.499	-0.131	-0.204	-0.32	0.151	0.375	0.136	0.427
659889	ITM2C	NM_030926	3026849	INTEGRAL MEMBRANE PROTEIN 2C	1.305	0.729	0.391	1.673	0.806	-1.812	-1.097	-2.616	-1.759	-1.777	-2.168	-1.326
661339	LOC728126	AL039916	3028172	ANTIGEN P97 (MELANOMA ASSOCIATED) IDENTIFIED BY MONOCLONAL ANTIBODIES 133.2 AND 96.5	0.22	0.867	0.465	0.832	-0.675	-0.805	-0.281	-0.767	-0.708	-0.292	-0.318	0.214
661372	A_24_P826690				0.703	1.028	1.709	1.291	-0.03	-1.967	-2.572	-2.748	-2.171	-3.892	-3.744	-0.41
662074	FCHO1	NM_015122	2864445	FCH DOMAIN ONLY 1	0.225	0.619	1.005	0.616	-1.272	-0.409	-1.009	-0.333	-0.112	-0.519	-0.847	0.146
662430	ITGAX	NM_000887			0.566	0.811	0.524	0.577	-0.59	-1.618	-0.966	0.236	-0.711	-0.074	-0.414	-0.74
662431	ABHD2	NM_007011			0.125	1.051	0.778	0.448	-1.207	-0.236	-0.162	-0.773	-1.03	-0.801	-0.403	-0.27
662610	ACSL6	NM_001009185	2871645	ACYL-COA SYNTHETASE LONG-CHAIN FAMILY MEMBER 6	0.695	2.308	0.143	2.424	-1.336	-2.532	-1.007	-3.625	-0.914	-2.718	-1.41	-0.217
664519	CBFA2T2	NM_005093	2942770	CORE-BINDING FACTOR, RUNT DOMAIN, ALPHA SUBUNIT 2; TRANSLOCATED TO, 2	0.955	0.102	-0.23	-0.078	-1.148	-0.224	-1.624	-1.455	1.396	-0.175	0.577	0.907
664900	COX6A1	NM_004373	2858435	CYTOCHROME C OXIDASE SUBUNIT VIA POLYPEPTIDE 1	-0.17	1.194	-0.078	0.316	-0.511	-0.393	-0.987	-1.96	0.343	0.893	1.911	1.916
665826	ABCG1	NM_207630	2859536	ATP-BINDING CASSETTE, SUB-FAMILY G (WHITE), MEMBER 1	0.659	1.073	0.545	0.607	-1.127	-0.256	-0.168	-0.124	-0.603	-0.681	-0.175	-0.767
665881	PTTG1IP	NM_004339	3029985	PITUITARY TUMOR-TRANSFORMING 1 INTERACTING PROTEIN	0.588	0.669	0.562	1.087	-1.061	-0.333	-0.521	-0.687	-0.651	-0.218	-1.424	0.22
666670	THC2565422	AA307830	2968563	GROWTH ARREST-SPECIFIC 5	0.928	0.369	-0.253	0.672	-0.713	-0.882	-1.598	-2.12	0.33	-0.167	-0.371	1.287
666808	hCG_1641703	XM_060535	2875439	SIMILAR TO RIBOSOMAL PROTEIN L18A	0.135	-0.322	-0.162	0.541	-0.503	-0.911	-1.694	-0.736	1.035	0.75	-0.048	0.76
667028	CREB3	NM_006368	2863572	CAMP RESPONSIVE ELEMENT BINDING PROTEIN 3	0.823	0.873	0.338	1.466	-1.873	0.167	-1.051	-1.312	0.799	-0.285	0.171	0.887
667181	AI216457	AI216457			0.384	0.42	0.37	-0.004	-0.214	-0.577	-0.676	-0.222	0.277	-0.357	0.229	0.084
667195	S81916	S81916	2860940	PHOSPHOGLYCERATE KINASE	0.44	0.866	0.892	0.79	-2.022	-0.445	-0.503	-1.099	-0.279	-0.817	-0.564	-0.529
667565	UBE3A	NM_130839	2876665	UBIQUITIN PROTEIN LIGASE E3A (HUMAN PAPILLOMA VIRUS E6-ASSOCIATED PROTEIN, ANGELMAN SYNDROME)	0.301	0.579	0.539	-0.067	-0.935	-0.613	-1.558	-1.695	1.03	0.025	0.395	-0.911
667633	AW378392	N91552	3027257	RIBOSOMAL PROTEIN L39	0.277	0.52	0.416	-0.185	-0.676	-0.319	-0.397	-0.436	0.077	0.068	0.251	0.449
667879	SFRS7	NM_001031684	2873329	SPLICING FACTOR, ARGININE/SERINE-RICH 7, 35KDA	0.591	0.438	0.401	0.531	-0.321	-0.274	-0.835	-0.633	-0.149	-0.165	0.193	0.429
667895	RAPGEF6	NM_016340	2866485	RAP GUANINE NUCLEOTIDE EXCHANGE FACTOR (GEF) 6	1.02	0.478	0.742	-0.463	-1.055	-1.762	-3.188	-2.304	-1.474	0.475	0.574	-0.713
668011	A_24_P791553				0.206	0.461	1.148	0.41	-1.211	-0.982	-1.253	-1.493	-0.795	-0.944	-1.183	0.479
668817	AHNAK	NM_001620	2865234	AHNAK NUCLEOPROTEIN (DESMOYOKIN)	0.73	1.173	0.868	0.686	-1.376	-0.212	0.138	-0.39	-0.244	-0.711	-0.256	-0.413
669028	MGAT5	NM_002410	3024649	MANNOSYL (ALPHA-1,6-)-GLYCOPROTEIN BETA-1,6-N-ACETYL-GLUCOSAMINYLTRANSFERASE	1.544	0.023	1.877	0.71	-0.635	-0.989	-0.816	-0.85	-0.793	0.338	-0.615	0.314
669984	COL9A2	NM_001852	3027075	COLLAGEN, TYPE IX, ALPHA 2	-0.045	0.61	0.78	1.141	-0.521	-0.194	-0.474	-0.264	-0.663	-0.669	-0.476	-0.267
670386	THC2608980				0.353	0.35	0.38	0.17	-0.77	-0.722	-0.635	-0.733	0.743	-0.53	-0.397	-0.47
671070	LOC100127972	AK092807	3024902	CDNA FLJ35488 FIS, CLONE SMINT2008545	1.291	0.25	1.739	0.042	-1.584	-0.83	-1.258	-0.647	0.534	-0.228	-0.303	-0.148
671213	LYRM1	NM_020424	2870415	HYPOTHETICAL PROTEIN A-211C6.1	0.167	0.401	1.454	1.602	-1.157	-1.586	-1.473	-2.992	1.195	0.638	-1.071	-1.021
671296	A_24_P238427				0.331	0.096	0.271	0.234	-0.561	-0.307	-1.154	-0.703	-0.479	0.082	-0.546	-0.53
671709	ENST00000401649				0.626	0.615	0.482	0.522	-1.232	-0.211	-0.708	-0.671	-0.986	0.004	-1.177	0.032
672136	AXIN2	NM_004655	2859595	AXIN 2 (CONDUCTIN, AXIL)	-0.216	1.35	0.356	0.701	-0.481	-1.075	-0.532	-0.61	-0.097	-0.411	-0.328	-0.28
672147	CTSZ	NM_001336	2879998	CATHEPSIN Z	1.446	-0.099	0.636	0.587	-0.888	-1.237	-1.084	-0.694	0.727	0.401	1.078	0.539
672323	hCG_1984468	NM_001005472	2871445	SIMILAR TO LAMININ RECEPTOR 1	0.181	1.163	0.29	0.982	-0.175	-0.589	-0.51	-0.643	-0.571	-0.35	-0.086	-0.151
672845	FXYD5	NM_144779	2877030	FXYD DOMAIN CONTAINING ION TRANSPORT REGULATOR 5	0.491	0.31	0.352	0.735	-0.749	-0.181	-0.54	-0.34	-0.509	-0.7	0.12	-0.207
673297	BC063570	AK000748	3027032	TBC1 DOMAIN FAMILY, MEMBER 8 (WITH GRAM DOMAIN)	0.306	0.146	-0.022	0.252	-0.229	-0.3	-0.299	-0.93	-0.276	-0.479	-0.457	-0.304
674401	hCG_1984468	NM_001005472			0.034	0.824	0.29	1.027	-0.563	-0.625	-0.211	-0.729	-0.868	-0.265	-0.202	-0.023
674711	PTTG1IP	NM_004339			0.772	0.567	0.636	-0.069	-0.502	-1.069	-1.001	-0.98	-0.425	-0.147	-0.854	0.407
675501	IRAK3	AK023663			1.324	0.64	0.648	1.498	0.209	-4.989	-2.696	-3.191	-2.186	-1.555	-2.327	-3.959
675638	CYB5R1	NM_016243	3029935	CYTOCHROME B5 REDUCTASE 1	0.132	-0.881	1.814	0.925	-1.31	-1.798	-1.817	-1.85	-0.202	-1.08	-1.373	-1.492
676408	HSPA13	NM_006948	2870714	STRESS 70 PROTEIN CHAPERONE, MICROSOME-ASSOCIATED, 60KDA	0.421	-0.201	0.923	0.38	-0.263	-2.381	-3.876	-4.182	0.567	0.392	-0.858	1.608
676740	COMMD3	NM_012071	2878507	COMM DOMAIN CONTAINING 3	-0.105	0.992	0.363	0.841	-0.647	-0.822	-0.961	-0.242	-0.908	-0.657	-0.458	-0.063
676776	ELAVL1	NM_001419	2869659	ELAV (EMBRYONIC LETHAL, ABNORMAL VISION, DROSOPHILA)-LIKE 1 (HU ANTIGEN R)	0.965	0.98	0.292	0.463	-1.74	-1.276	-2.222	-3.286	-0.514	-1.591	0.175	-0.539
677242	TMEM181	AB037844	2860932	G PROTEIN-COUPLED RECEPTOR 178	0.458	-0.464	0.284	-0.634	-0.116	-0.536	-0.742	-0.464	0.815	0.437	0.493	1.245
677294	PDE9A	NM_002606	3029473	PHOSPHODIESTERASE 9A	-0.547	1.367	1.054	1.266	-0.783	-0.494	-0.521	-0.572	-0.541	-0.346	-0.571	-0.514
678602	PIK3CD	NM_005026	2862962	PHOSPHOINOSITIDE-3-KINASE, CATALYTIC, DELTA POLYPEPTIDE	0.463	1.043	0.145	1.02	-0.588	-0.419	-0.751	-0.694	-0.703	-0.302	-0.549	-0.12
678730	DPH5	NM_015958	2872200	DPH5 HOMOLOG (S. CEREVISIAE)	0.146	0.892	1.703	0.568	-0.78	-2.246	-2.613	-2.006	-1.217	0.517	1.588	-0.9
679665	TXNL4B	NM_017853	2877033	THIOREDOXIN-LIKE 4B	1.174	1.821	0.825	1.103	-0.703	-1.54	-1.093	-0.38	-0.569	1.408	0.649	-0.187
679990	ERLIN1	NM_006459	2870659	SPFH DOMAIN FAMILY, MEMBER 1	0.622	0.55	0.877	-0.343	-0.416	-0.588	-0.608	-0.798	-0.58	-0.609	-0.095	-0.1
680543	RPL13	NM_033251	2890491	RIBOSOMAL PROTEIN L13	0.463	0.24	0.306	0.211	-0.788	-0.37	-1.418	-0.671	-0.468	0.149	-0.479	-0.553
680548	RPL13	NM_033251			0.474	0.165	0.224	0.241	-0.523	-0.342	-1.557	-0.57	-0.506	-0.051	-0.489	-0.572
681143	SSR4	NM_006280	2866906	SIGNAL SEQUENCE RECEPTOR, DELTA (TRANSLOCON-ASSOCIATED PROTEIN DELTA)	0.168	0.064	0.745	0.179	-0.142	-0.452	-1.004	-0.116	0.212	0.575	0.525	0.499
CLUSTER 6 ONTOGENY
Category	Term	Count	%	PValue	Genes	List Total	Pop Hits	Pop Total	Fold Enrichment	Bonferroni	Benjamini	FDR
PANTHER_BP_ALL	BP00071:Proteolysis	19	31.67%	0.01259102669421093	2869659, 2865938, 2859536, 2865028, 2876898, 3026673, 3029935, 2942770, 2866485, 2876665, 2862962, 3026849, 2870659, 2879998, 3028294, 2870656, 2863681, 2867114, 2859595,	59	5357	29414	1.7682107681063584	0.9384319606629052	0.9384319606629052	14.895792808642183
PANTHER_BP_ALL	BP00060:Protein metabolism and modification	13	21.67%	0.023351241868655517	3027257, 2860124, 3026673, 2870714, 2890491, 3028042, 2876665, 2879998, 2864445, 2871503, 3023757, 3024649, 2875439,	59	3257	29414	1.989883588411921	0.9944735215915773	0.8231997699124598	25.97539885803315
PANTHER_BP_ALL	BP00276:General vesicle transport	7	11.67%	0.017779107188178586	2877033, 2865028, 2876898, 3027032, 3029935, 2866485, 2866906,	59	1060	29414	3.292260952990086	0.980679564617708	0.8610020310137879	20.415695493937736
